# Supplementary material for: Molybdenum-catalyzed hydrogenation of carbon dioxide, bicarbonate, and inorganic carbonates to formates
Source: Royal Society of Chemistry journal article supplement (doi:10.1039/d4dt00916a), 2024-01-01
Supplement: d4dt00916a1.pdf [file d4dt00916a1.pdf]

## Supporting Information

Molybdenum Catalyzed Hydrogenation of Carbon dioxide,  
Bicarbonate, and Inorganic Carbonates to Formate

Tushar Singh,<sup>a</sup> and Subrata Chakraborty\*<sup>a</sup>

<sup>a</sup>Department of Chemistry, Indian Institute of Technology Jodhpur, Karwar, Jodhpur, 342037,  
Rajasthan

\*Corresponding author: Email: [subrata@iitj.ac.in](mailto:subrata@iitj.ac.in)

### Table of Contents

|                                                                                        |         |
|----------------------------------------------------------------------------------------|---------|
| 1. <sup>1</sup> H NMR Spectra of catalytic runs for CO <sub>2</sub> hydrogenation.     | S2-S13  |
| 2. <sup>1</sup> H NMR Spectra of catalytic runs for sodium bicarbonate hydrogenation.  | S13-S16 |
| 3. <sup>1</sup> H NMR Spectra of catalytic runs for inorganic carbonate hydrogenation. | S16-S18 |
| 4. Homogeneity test                                                                    | S19     |
| 5. Mechanistic experiments                                                             | S19-S23 |
| 6. Characterization data of Molybdenum complexes (C-1 to C-8)                          | S24-S39 |
| 7. Crystal data                                                                        | S40-S43 |
| 8. References                                                                          | S43     |

## 1. $^1\text{H}$ NMR spectra of catalytic runs for $\text{CO}_2$ hydrogenation:

**Figure S1.** Conditions: C-1, NaOH,  $p_{\text{H}_2}/p_{\text{CO}_2}$  (bar) = 30/10, 130 °C, 24 h (Table 1, entry 1).

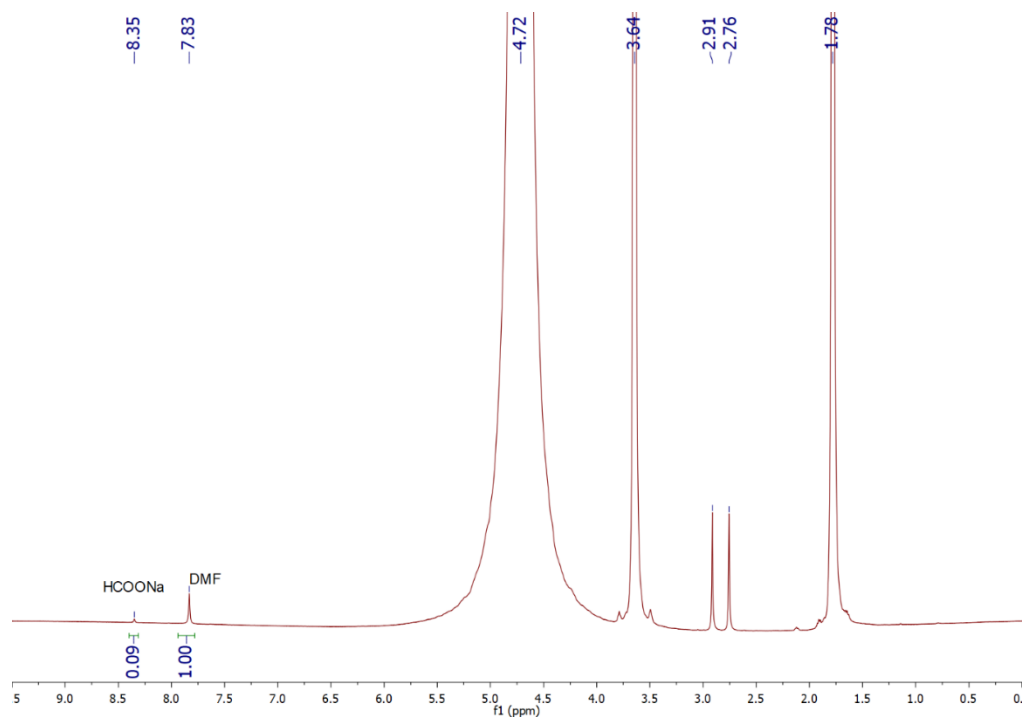

**Figure S2.** Conditions: C-2, NaOH,  $p_{\text{H}_2}/p_{\text{CO}_2}$  (bar) = 30/10, 130 °C, 24 h (Table 1, entry 2).

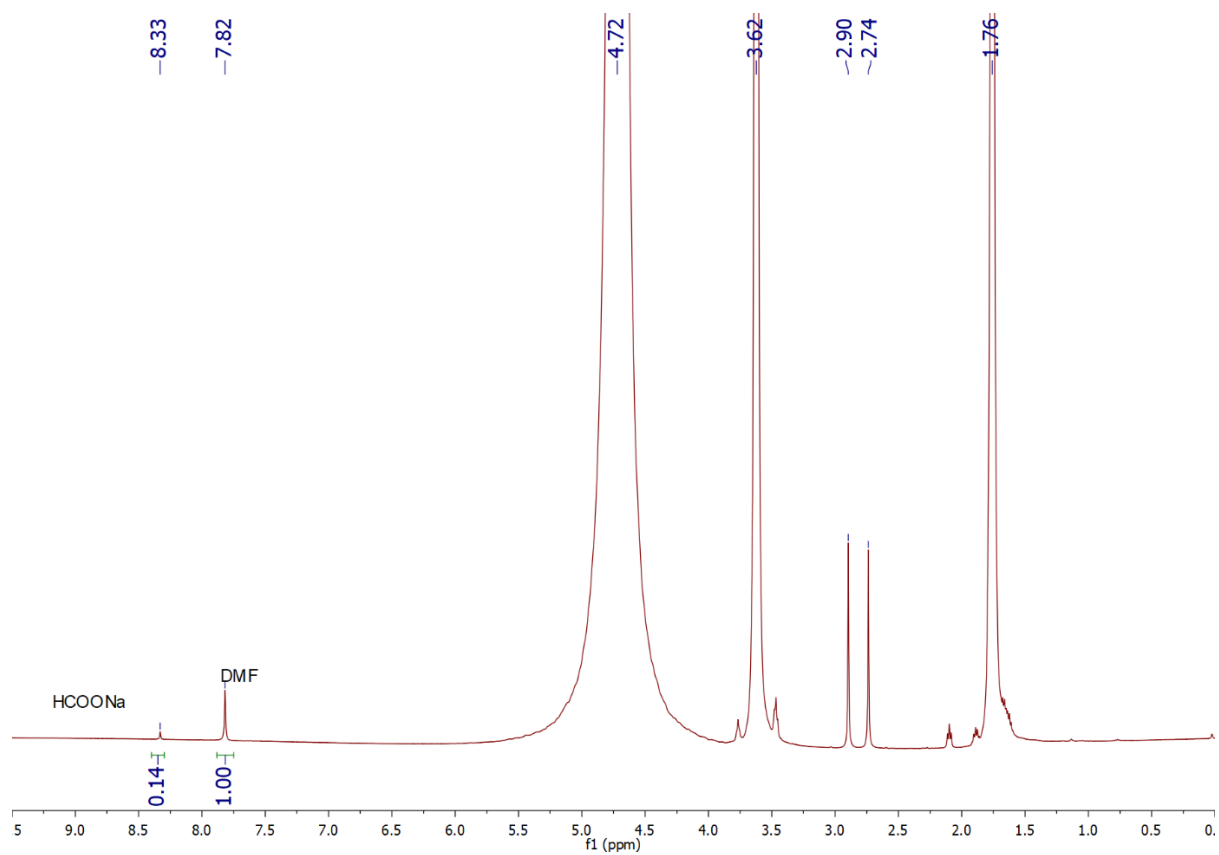

**Figure S3.** Conditions: **C-3**, NaOH,  $p_{H_2}/p_{CO_2}$  (bar) = 30/10, 130 °C, 24 h (Table 1, entry 3).

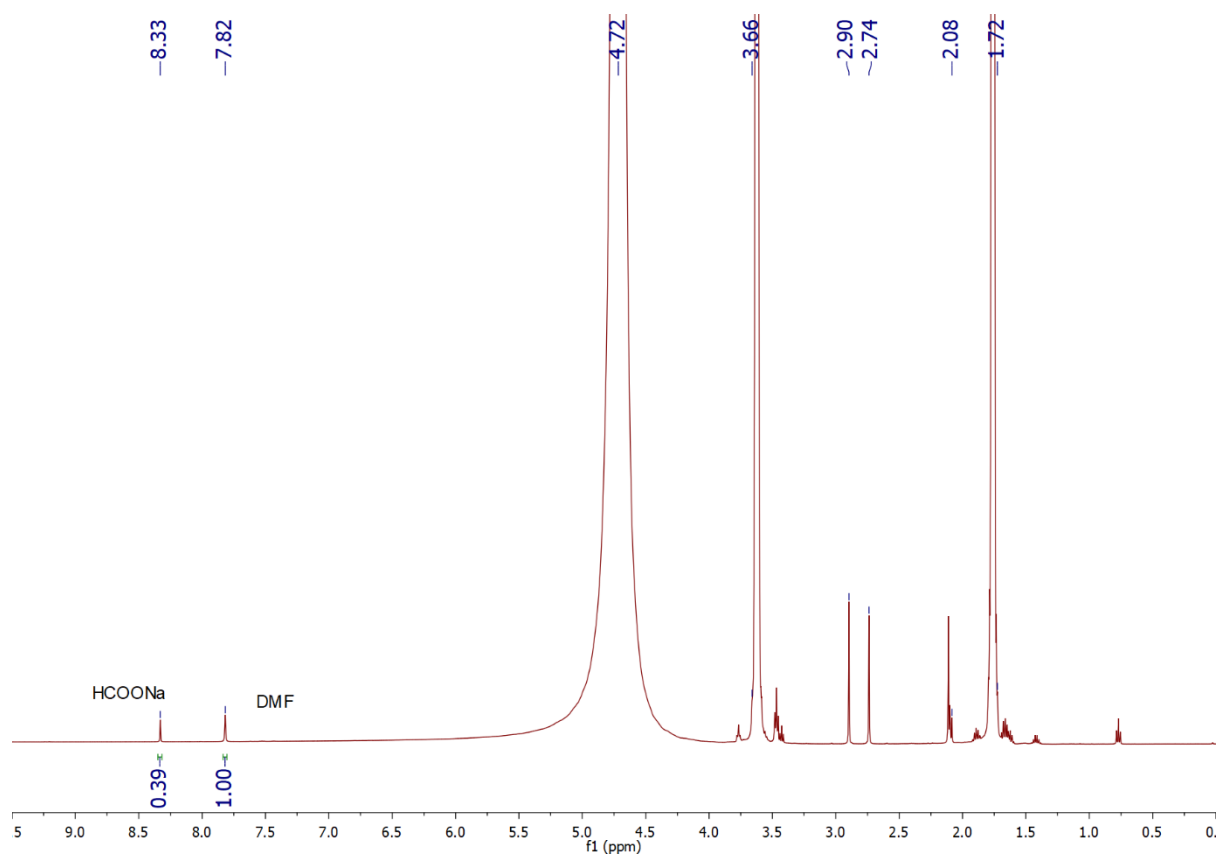

**Figure S4.** Conditions: **C-4**, NaOH,  $p_{H_2}/p_{CO_2}$  (bar) = 30/10, 130 °C, 24 h (Table 1, entry 4).

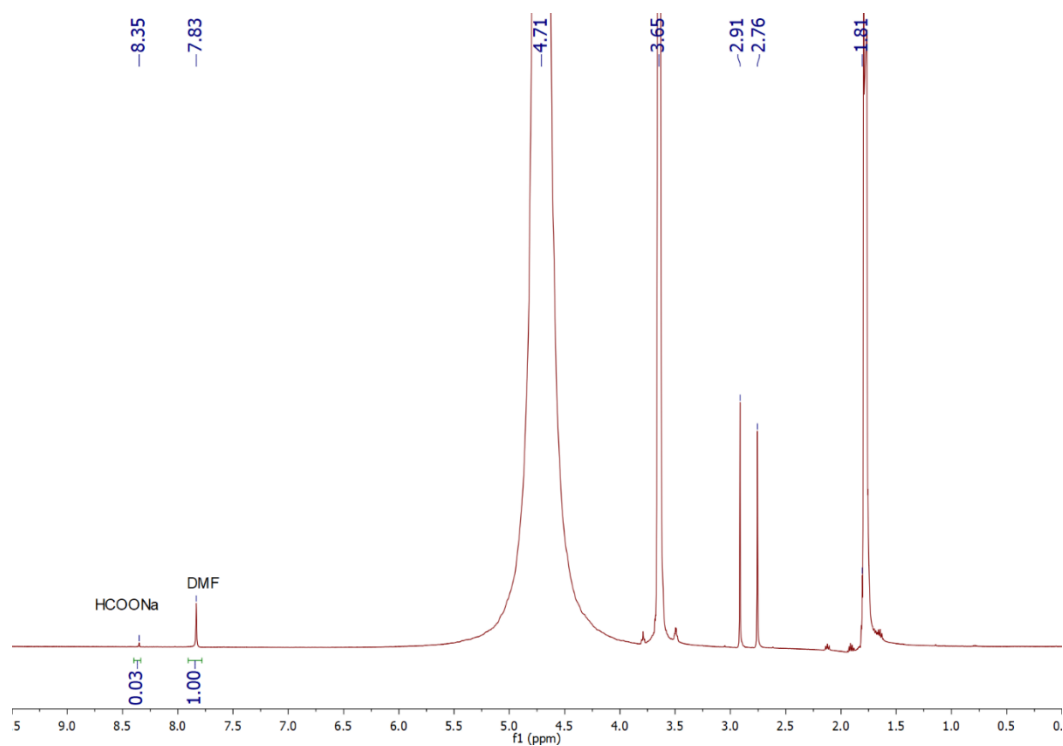

**Figure S5.** Conditions: **C-5**, NaOH, pH<sub>2</sub>/pCO<sub>2</sub> (bar) = 30/10, 130 °C, 24 h (Table 1, entry 5).

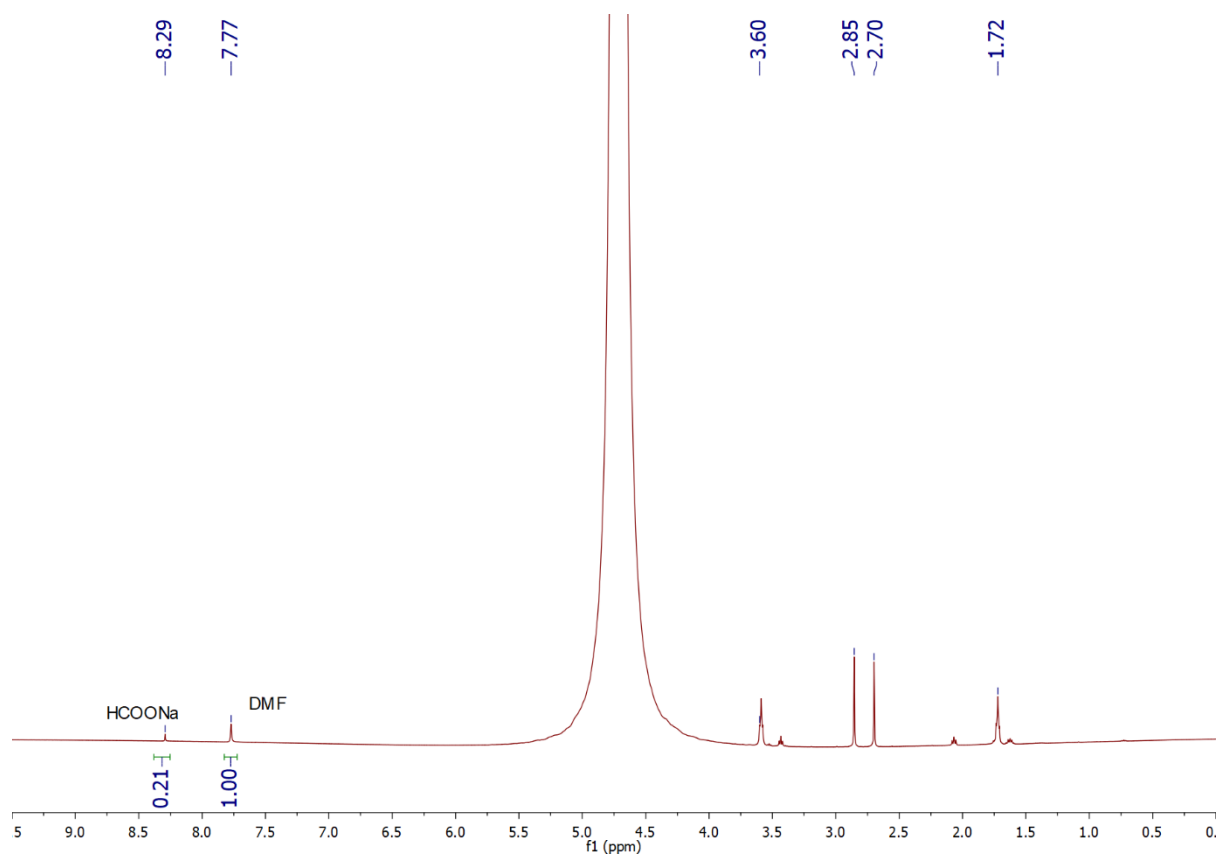

**Figure S6.** Conditions: **C-6**, NaOH, pH<sub>2</sub>/pCO<sub>2</sub> (bar) = 30/10, 130 °C, 24 h (Table 1, entry 6).

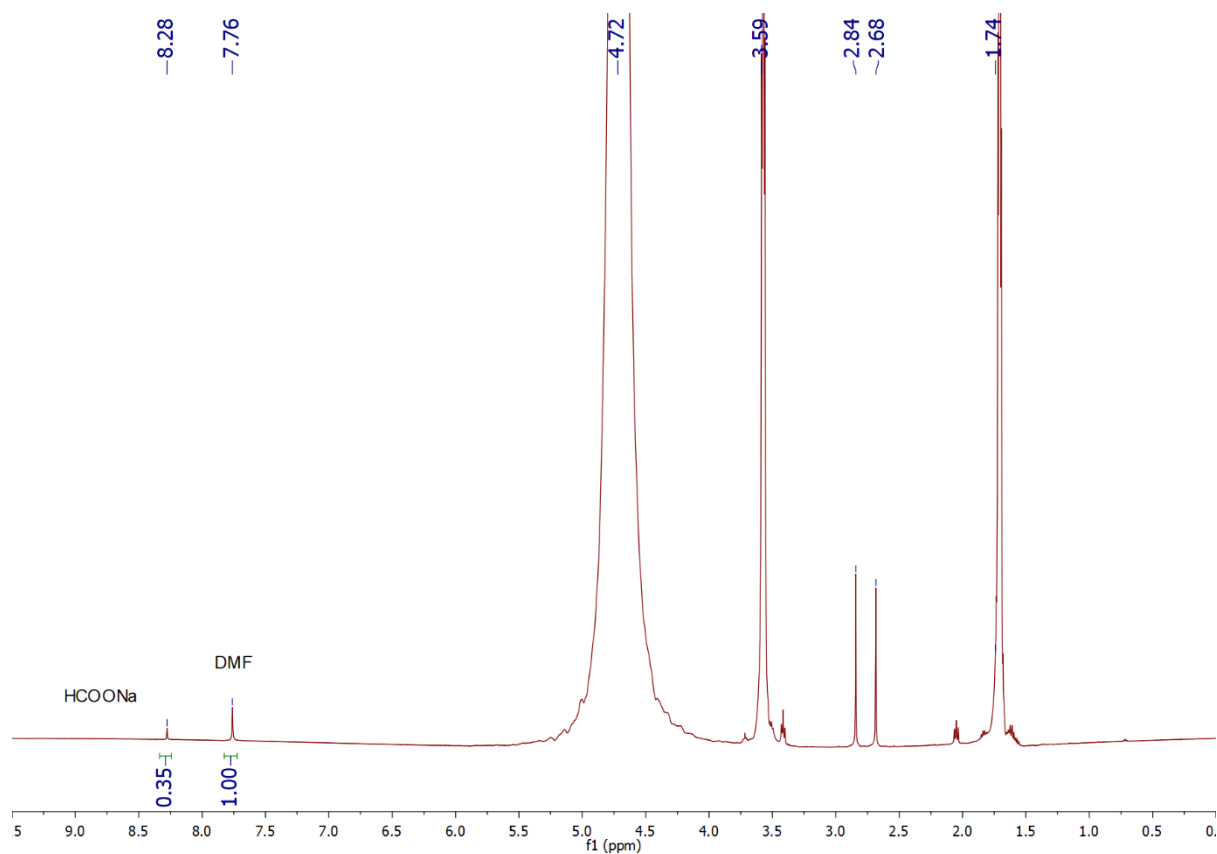

**Figure S7.** Conditions: NaOH,  $p\text{H}_2/p\text{CO}_2$  (bar) = 30/10, 130 °C, 24 h (Table 1, entry 7).

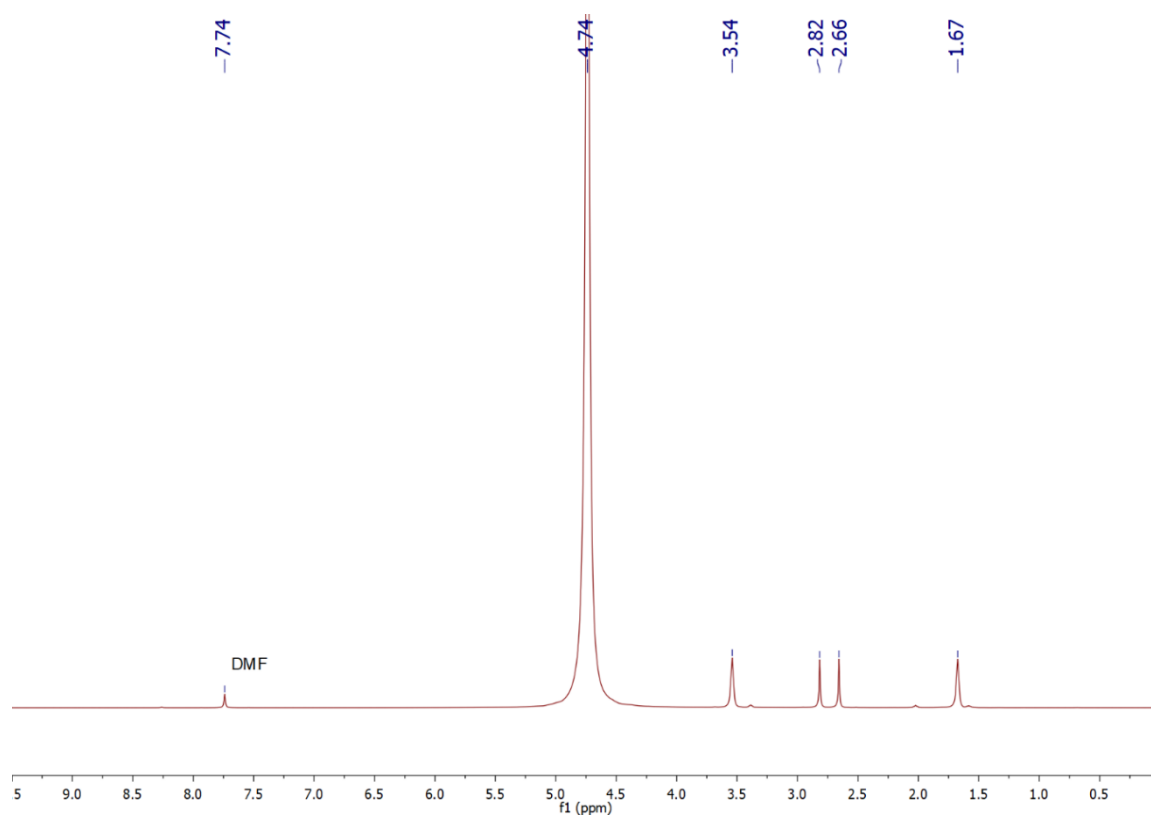

**Figure S8.** Conditions: C-7, NaOH,  $p\text{H}_2/p\text{CO}_2$  (bar) = 30/10, 130 °C, 24 h (Table 1, entry 8).

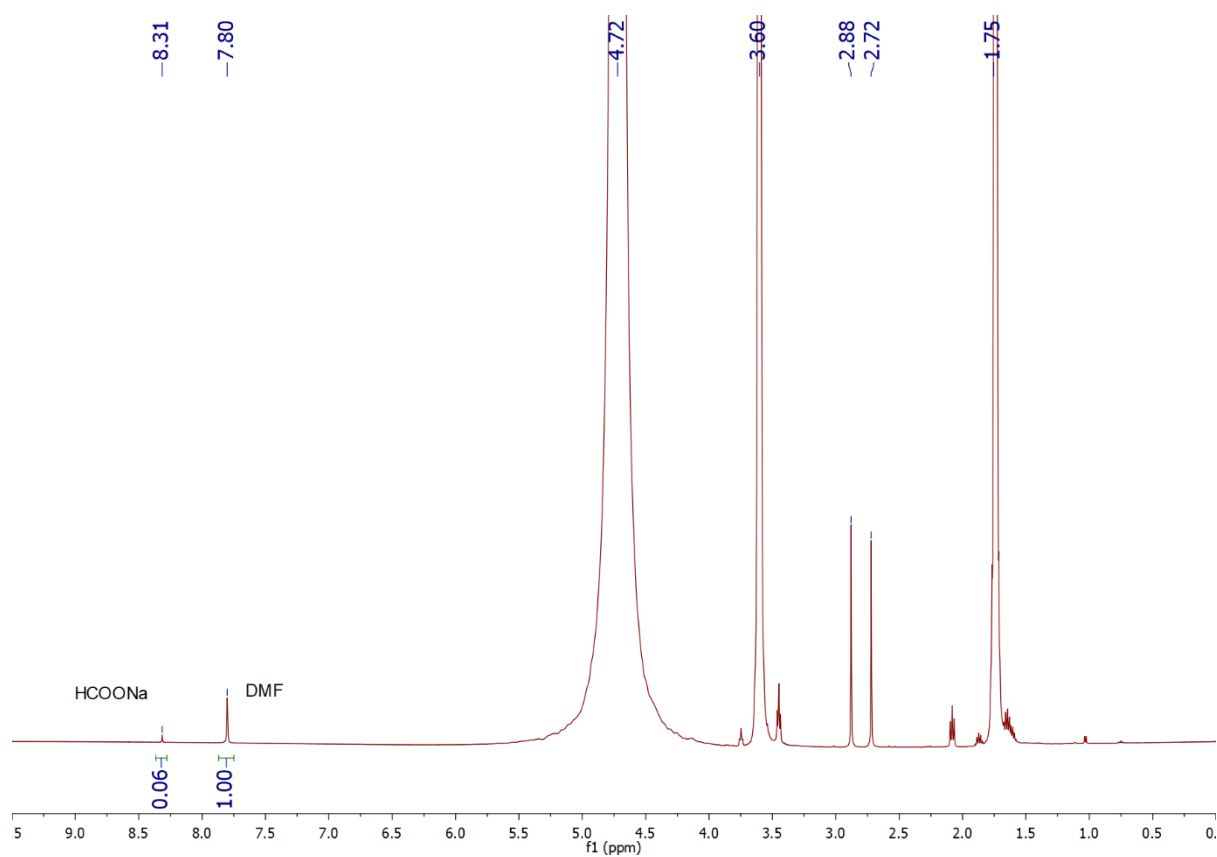

**Figure S9.** Conditions: **C-8**, NaOH, pH<sub>2</sub>/pCO<sub>2</sub> (bar) = 30/10, 130 °C, 24 h (Table 1, entry 9).

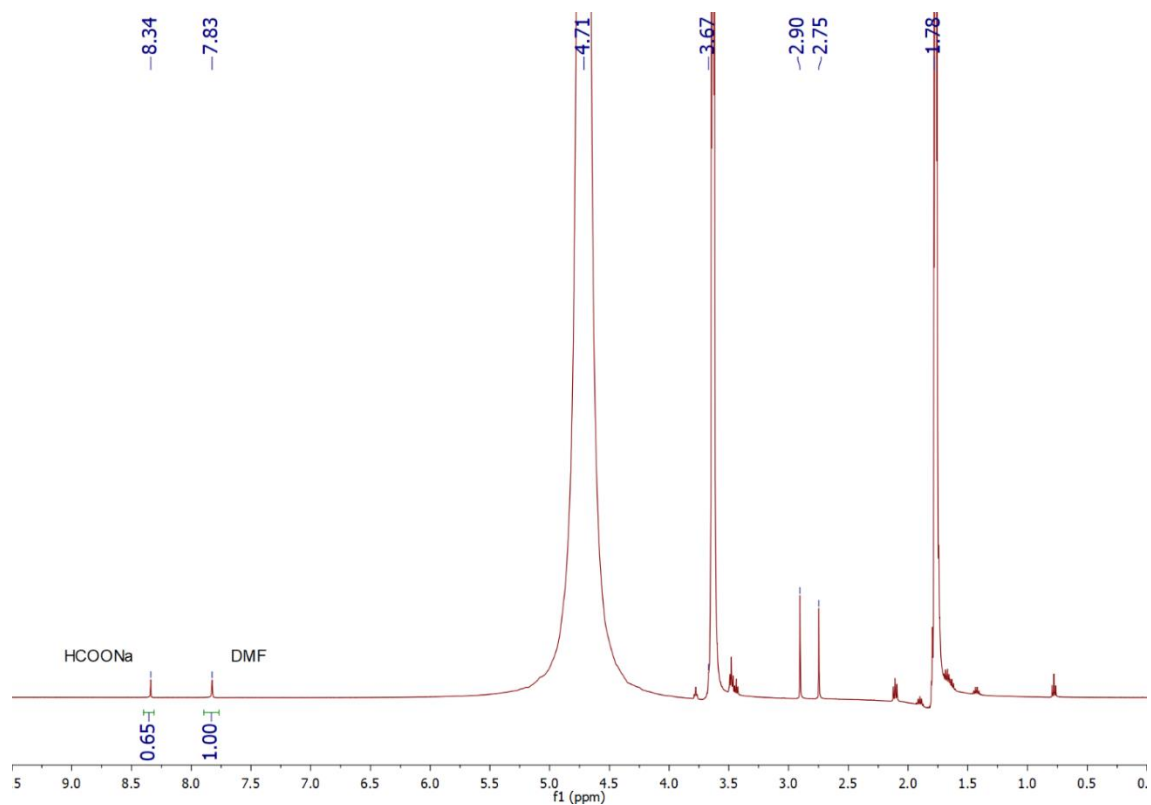

**Figure S10.** Conditions: **C-3**, DBU, NaOH (0.1 mmol), pH<sub>2</sub>/pCO<sub>2</sub> (bar) = 30/10, 130 °C, 24 h (Table 1, entry 10).

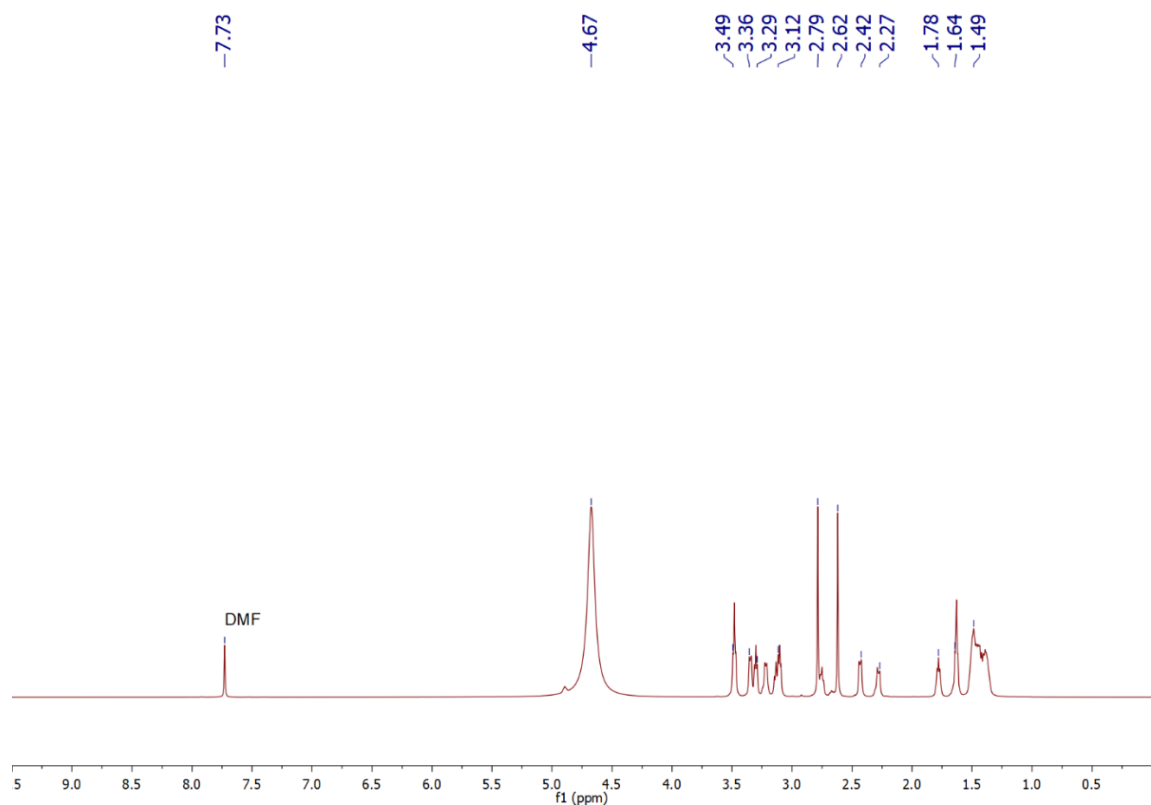

**Figure S11.** Conditions: **C-3**, Et<sub>3</sub>N, NaOH (0.1 mmol), pH<sub>2</sub>/pCO<sub>2</sub> (bar) = 30/10, 130 °C, 24 h (Table 1, entry 11).

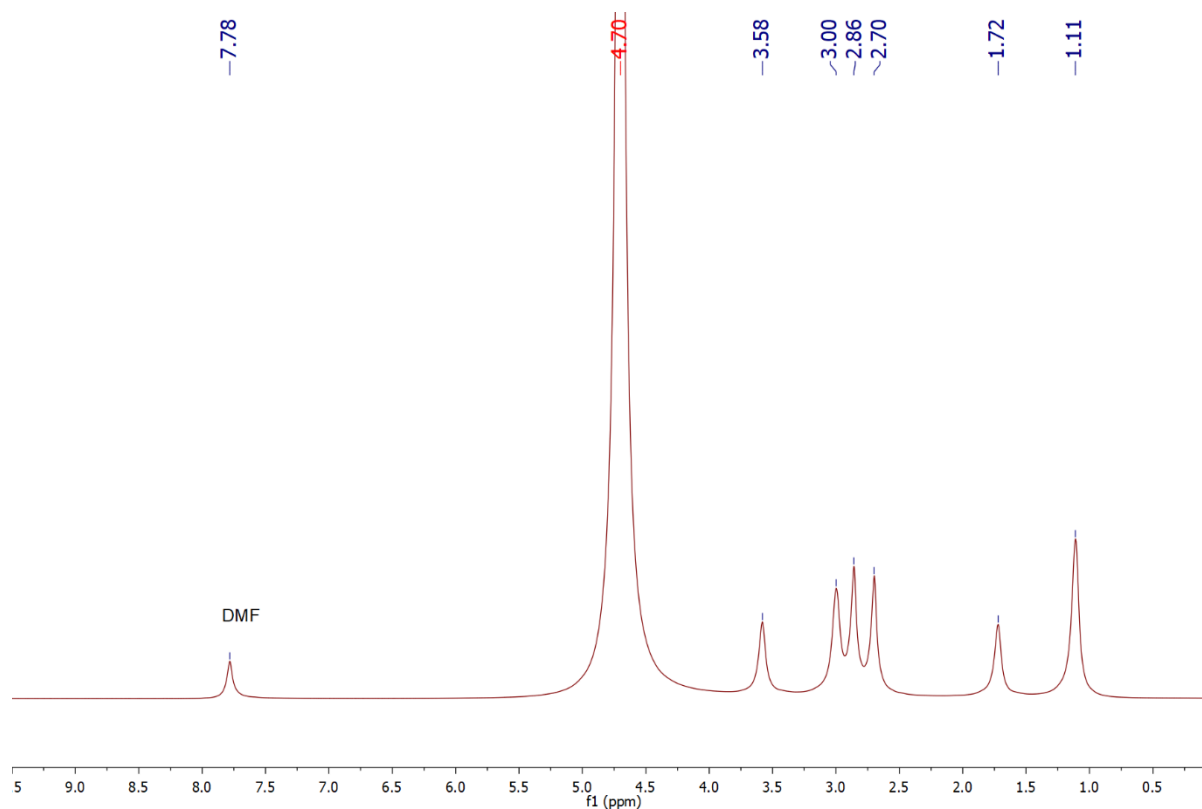

**Figure S12.** Conditions: **C-3**, K<sub>3</sub>PO<sub>4</sub>, NaOH (0.1 mmol), pH<sub>2</sub>/pCO<sub>2</sub> (bar) = 30/10, 130 °C, 24 h (Table 1, entry 12).

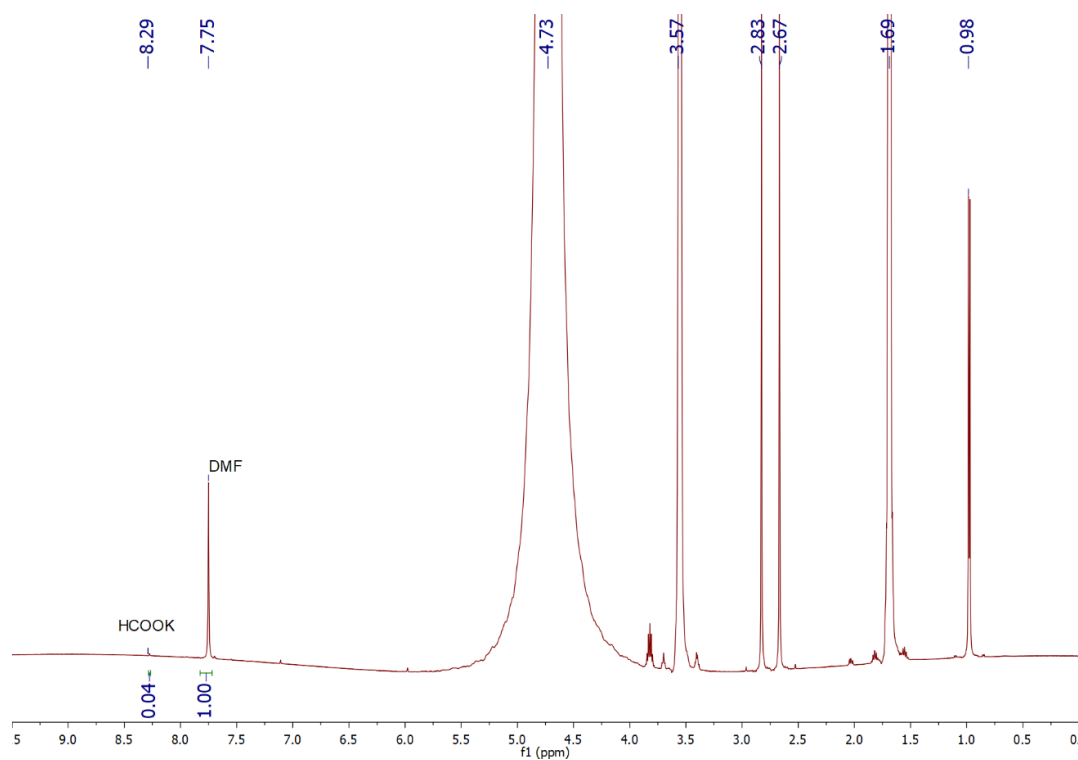

**Figure S13.** Conditions: **C-3**, KOH,  $p\text{H}_2/p\text{CO}_2$  (bar) = 30/10, 130 °C, 24 h (Table 1, entry 13).

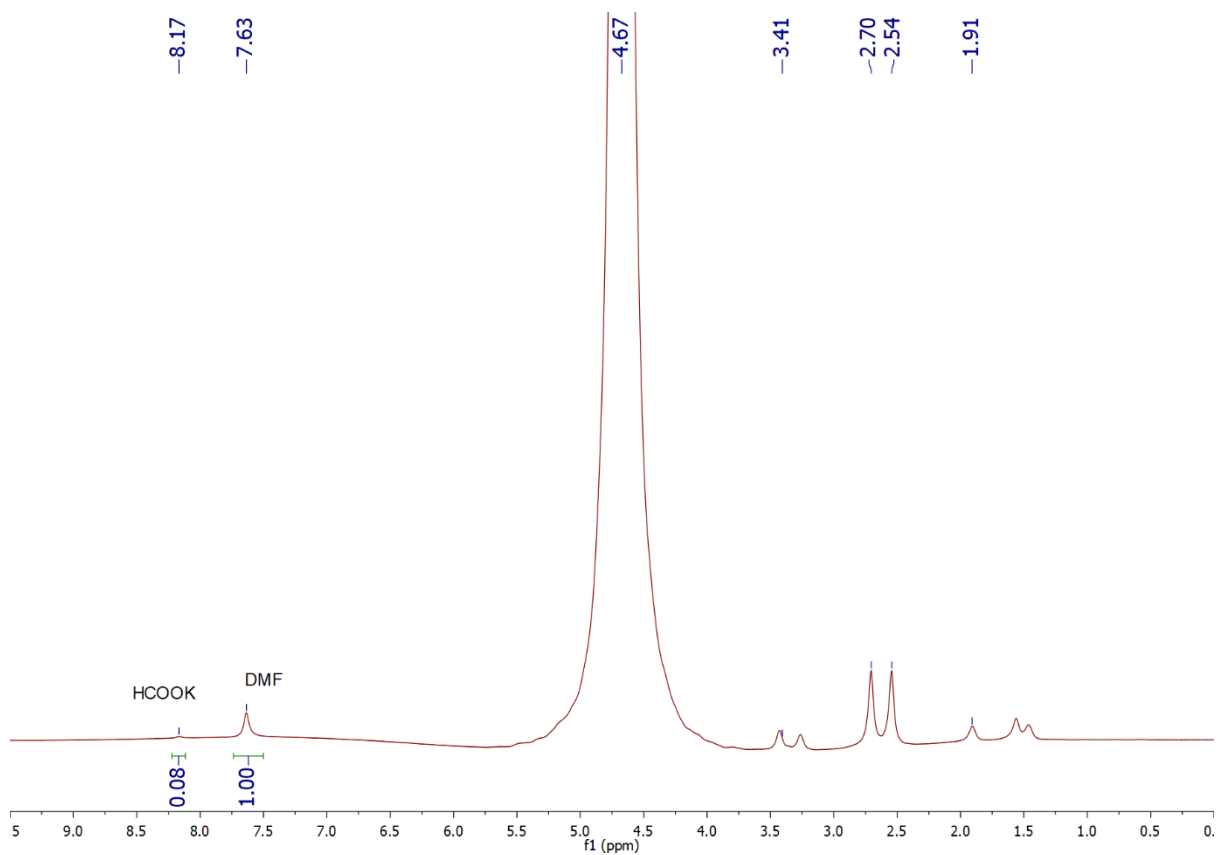

**Figure S14.** Conditions: **C-3**, LiOH,  $p\text{H}_2/p\text{CO}_2$  (bar) = 30/10, 130 °C, 24 h (Table 1, entry 14).

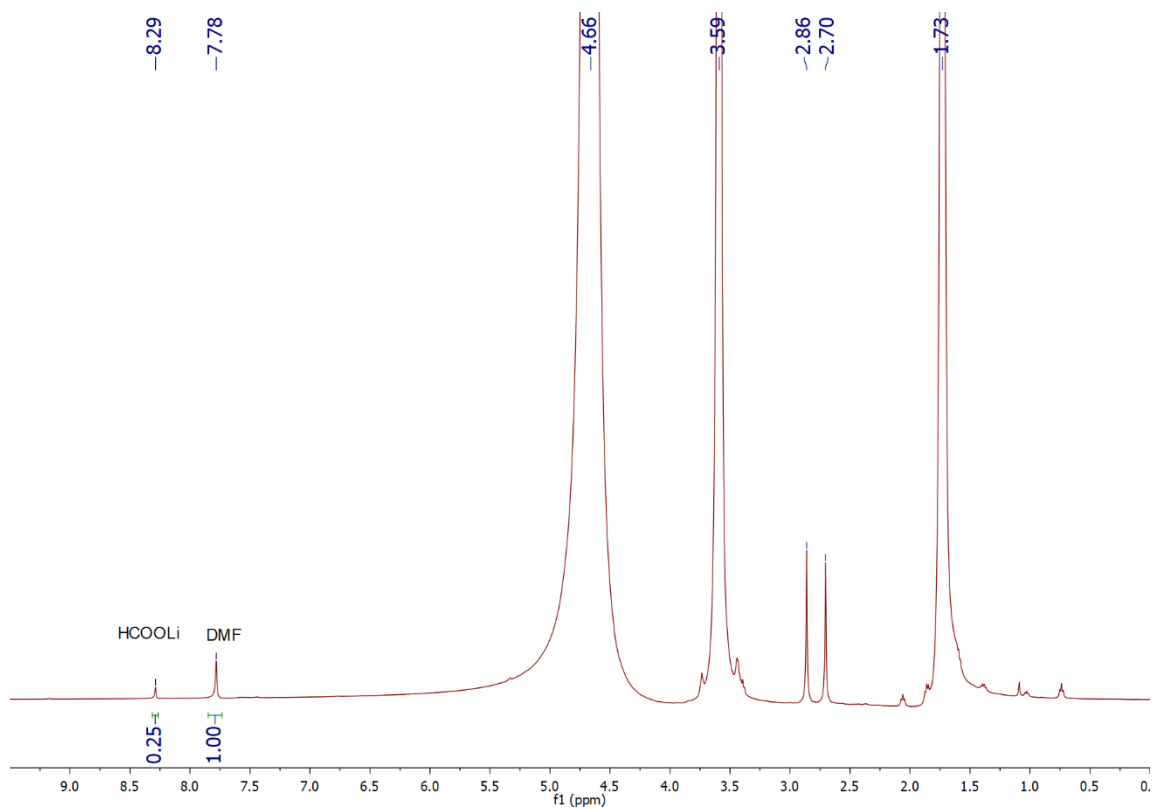



**Figure S15.** Conditions: **C-3**,  $\text{Ca}(\text{OH})_2$ ,  $\text{pH}_2/\text{pCO}_2$  (bar) = 30/10, 130 °C, 24 h (Table 1, entry 15).

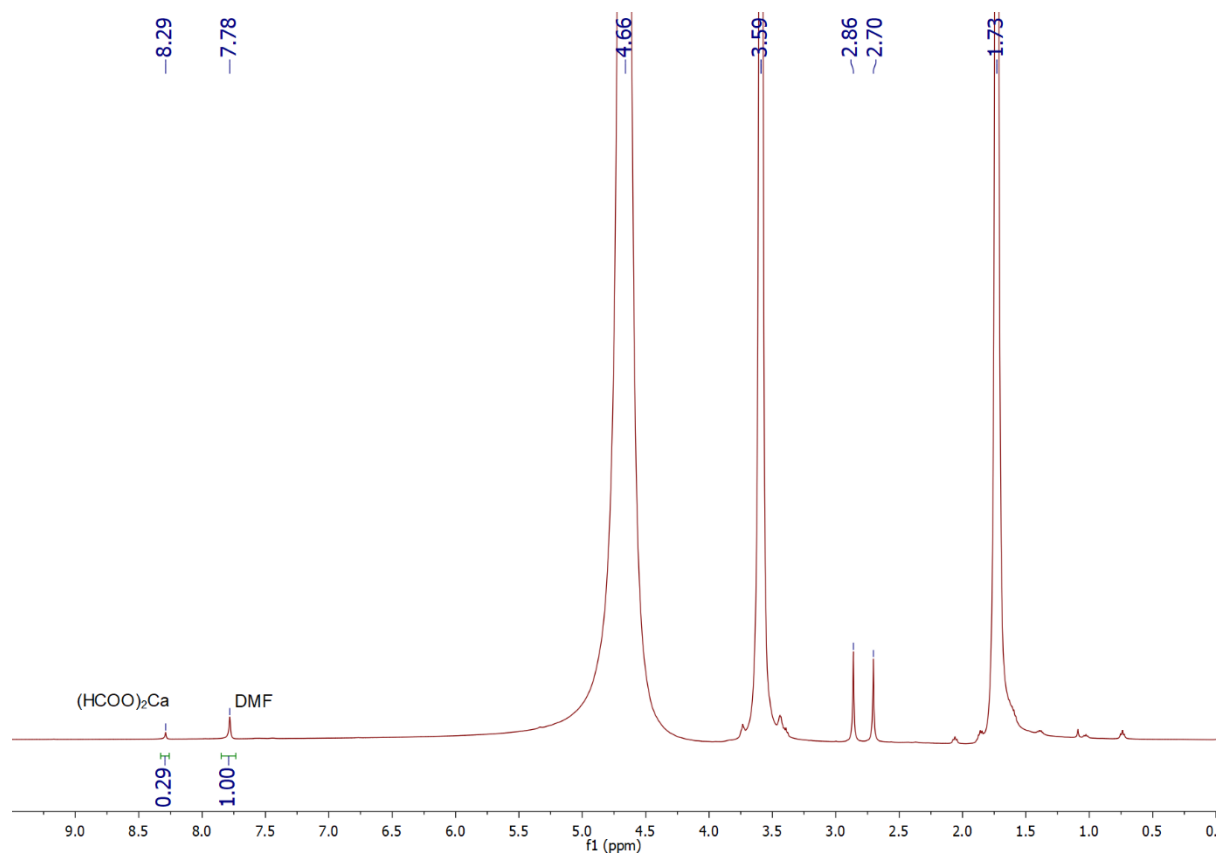

**Figure S16.** Conditions: **C-3**, NaOH,  $\text{pH}_2/\text{pCO}_2$  (bar) = 30/10, 130 °C, 12 h (Table 1, entry 16).

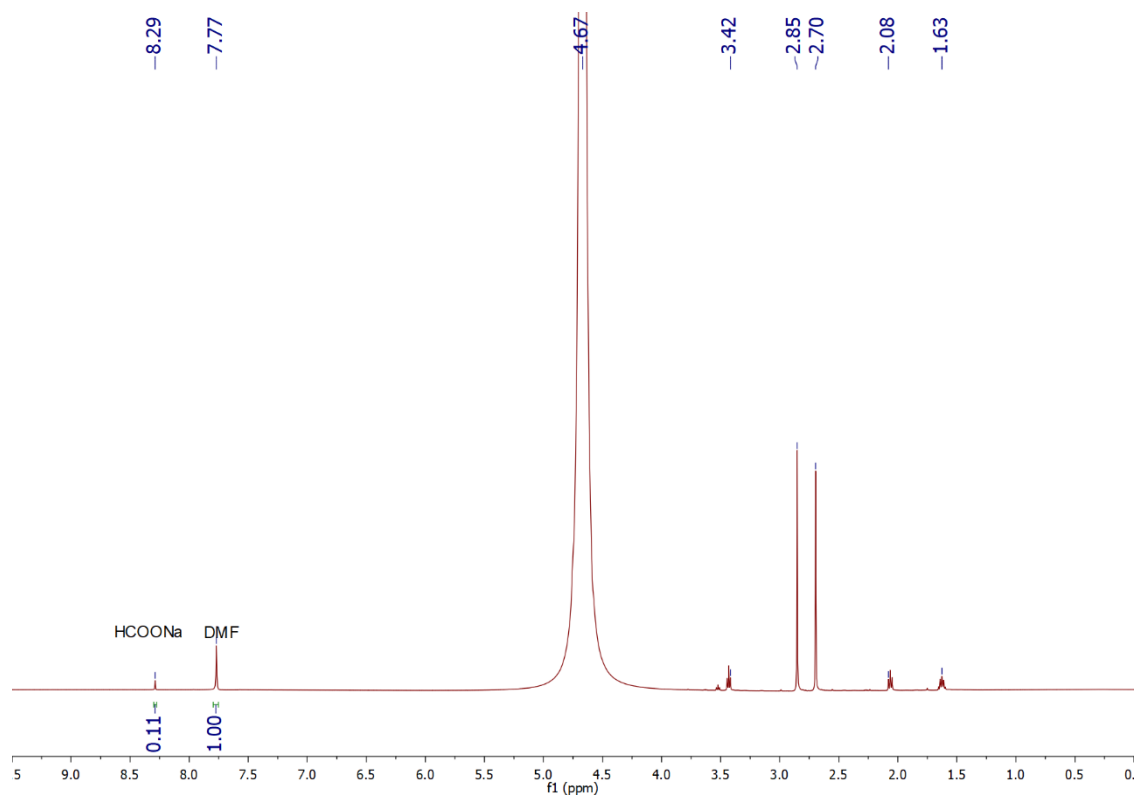

**Figure S17.** Conditions: **C-3**, NaOH,  $p_{H_2}/p_{CO_2}$  (bar) = 30/10, 130 °C, 48 h (Table 1, entry 17).

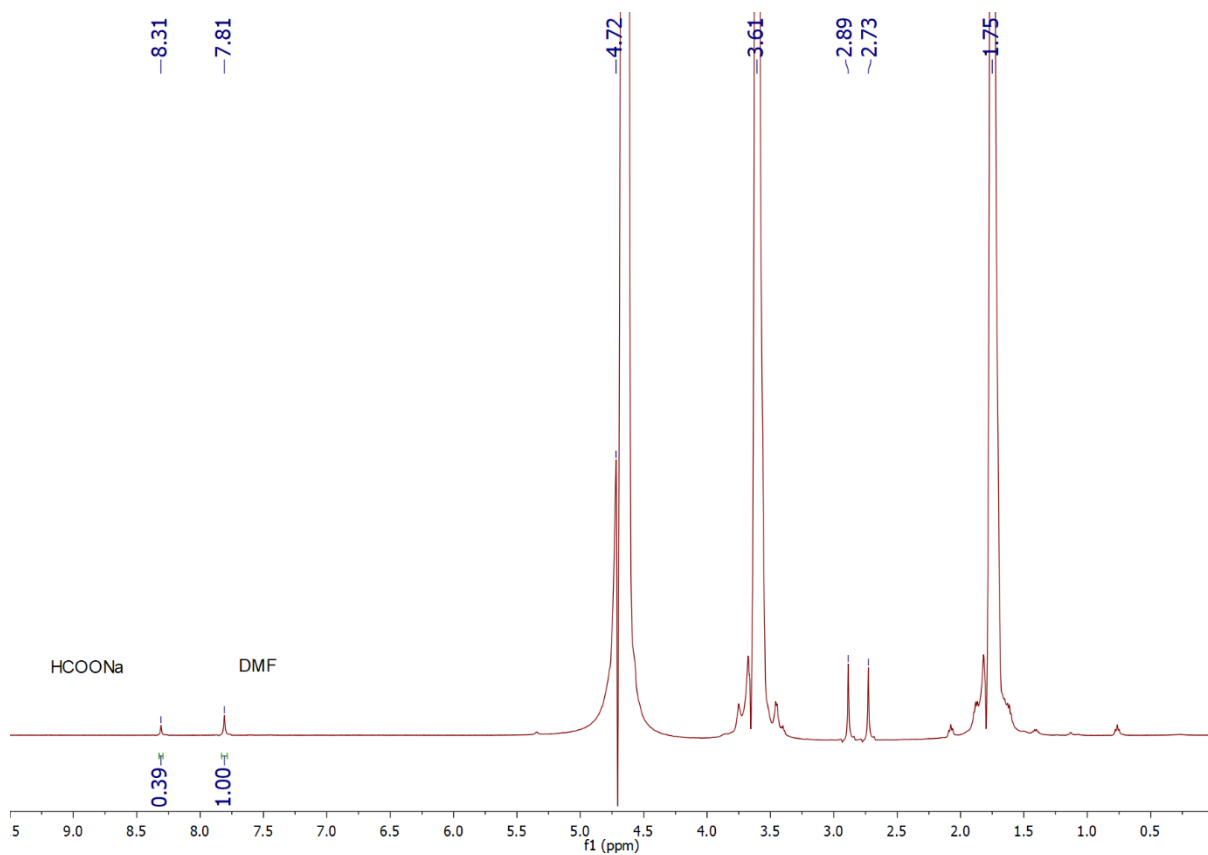

**Figure S18.** Conditions: **C-3**, NaOH, 0.1 mmol TMNO,  $p_{H_2}/p_{CO_2}$  (bar) = 30/10, 130 °C, 24 h (Table 1, entry 18).

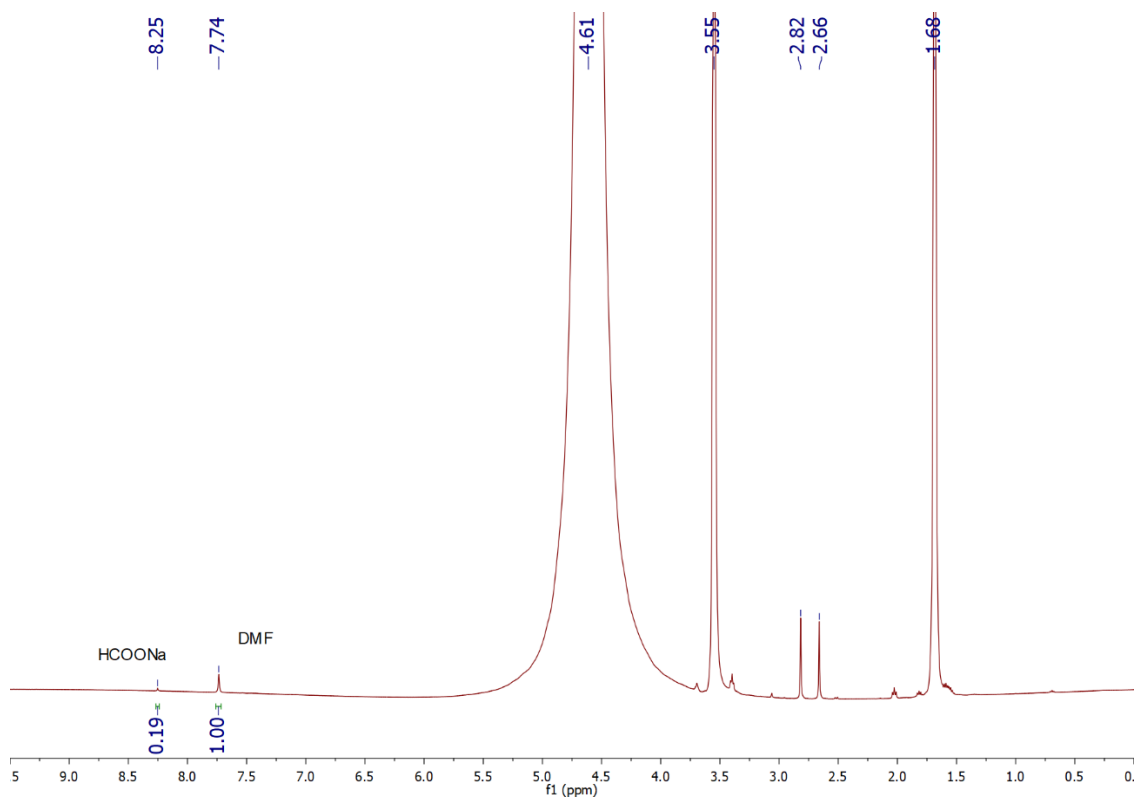

**Figure S19.** Conditions: C-3, NaOH, p<sub>H2</sub>/p<sub>CO2</sub> (bar) = 30/10, 130 °C, 24 h (Table 1, entry 19).

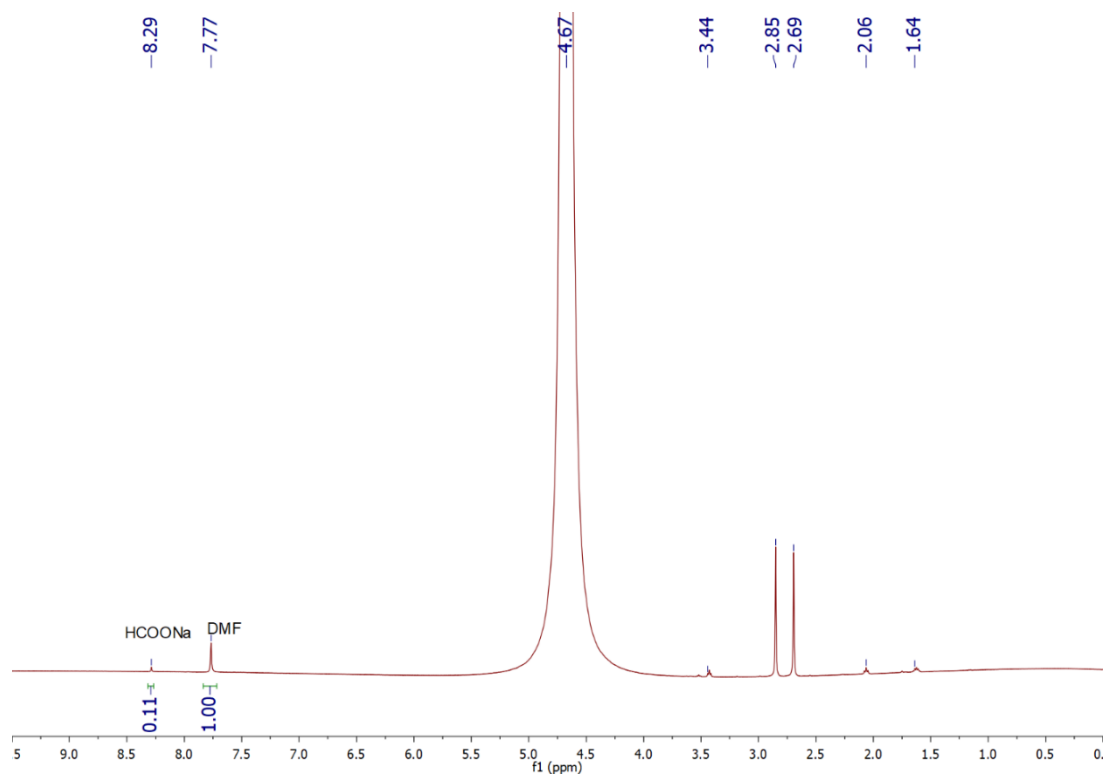

**Figure S20.** Conditions: C-3, NaOH, p<sub>H2</sub>/p<sub>CO2</sub> (bar) = 30/10, 130 °C, 24 h only water (Table 1, entry 20).

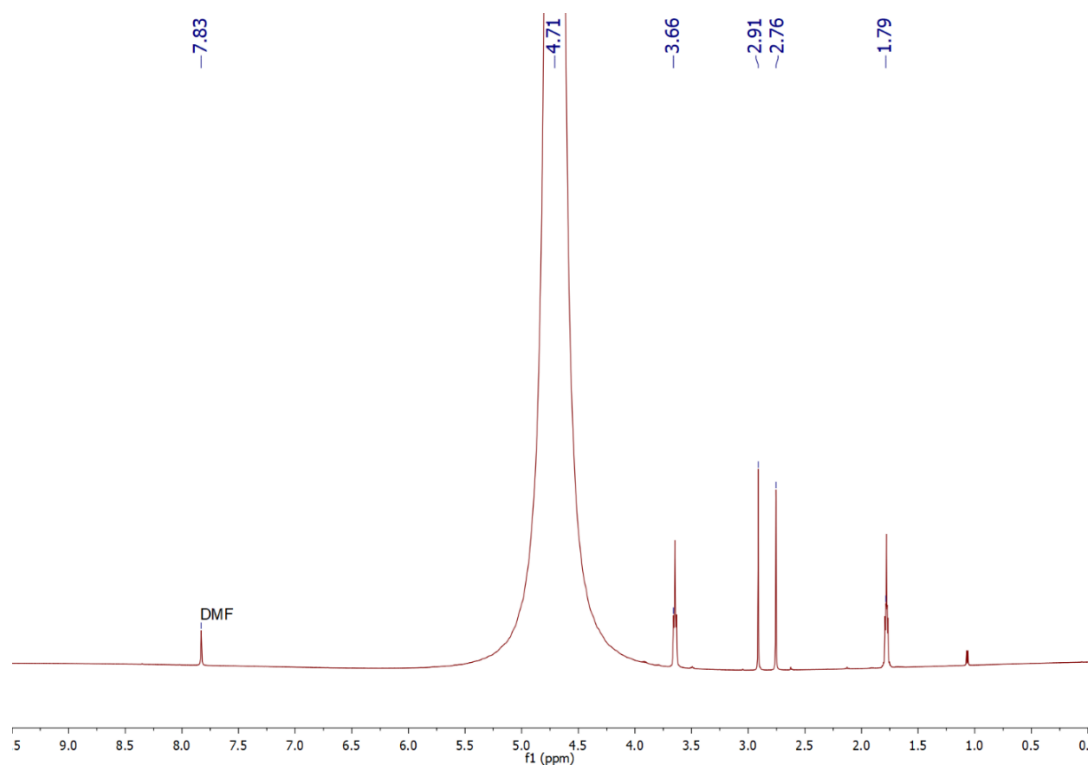

**Figure S21.** Conditions: **C-3**, NaOH, pH<sub>2</sub>/pCO<sub>2</sub> (bar) = 30/10, 130 °C, 24 h only THF (Table 1, entry 21).

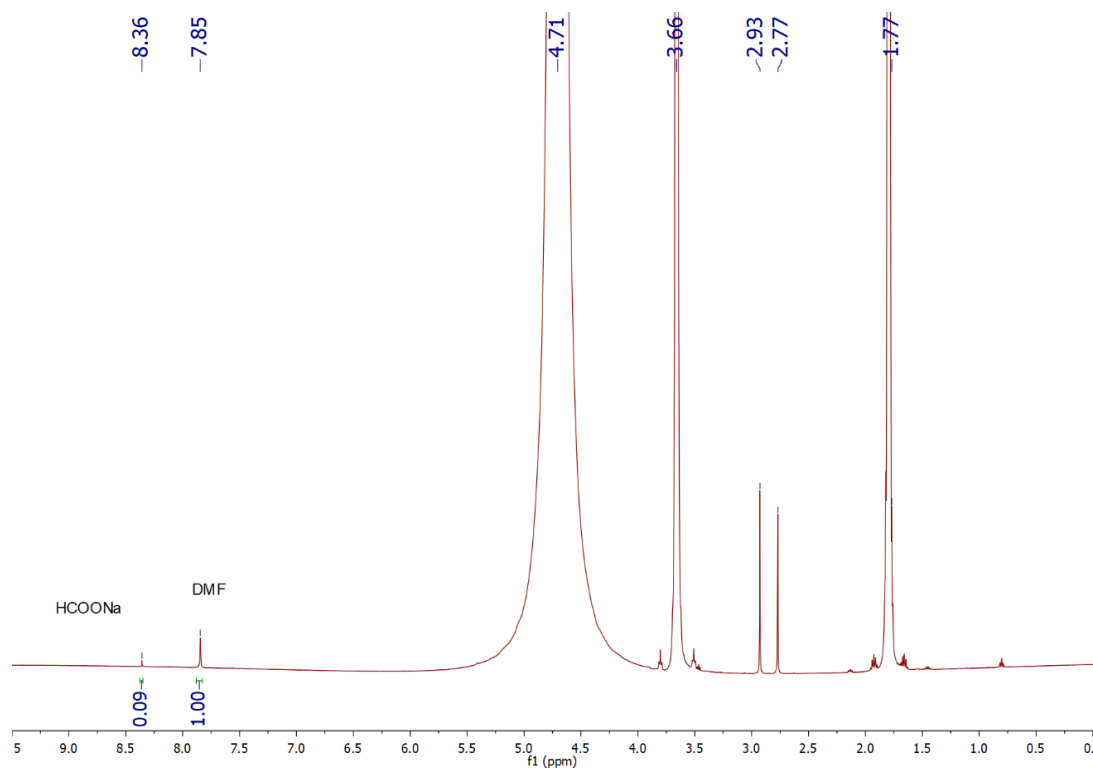

**Figure S22.** Conditions: **C-3**, NaOH, pH<sub>2</sub>/pCO<sub>2</sub> (bar) = 10/10, 130 °C, 24 h, (Table 1, entry 22).

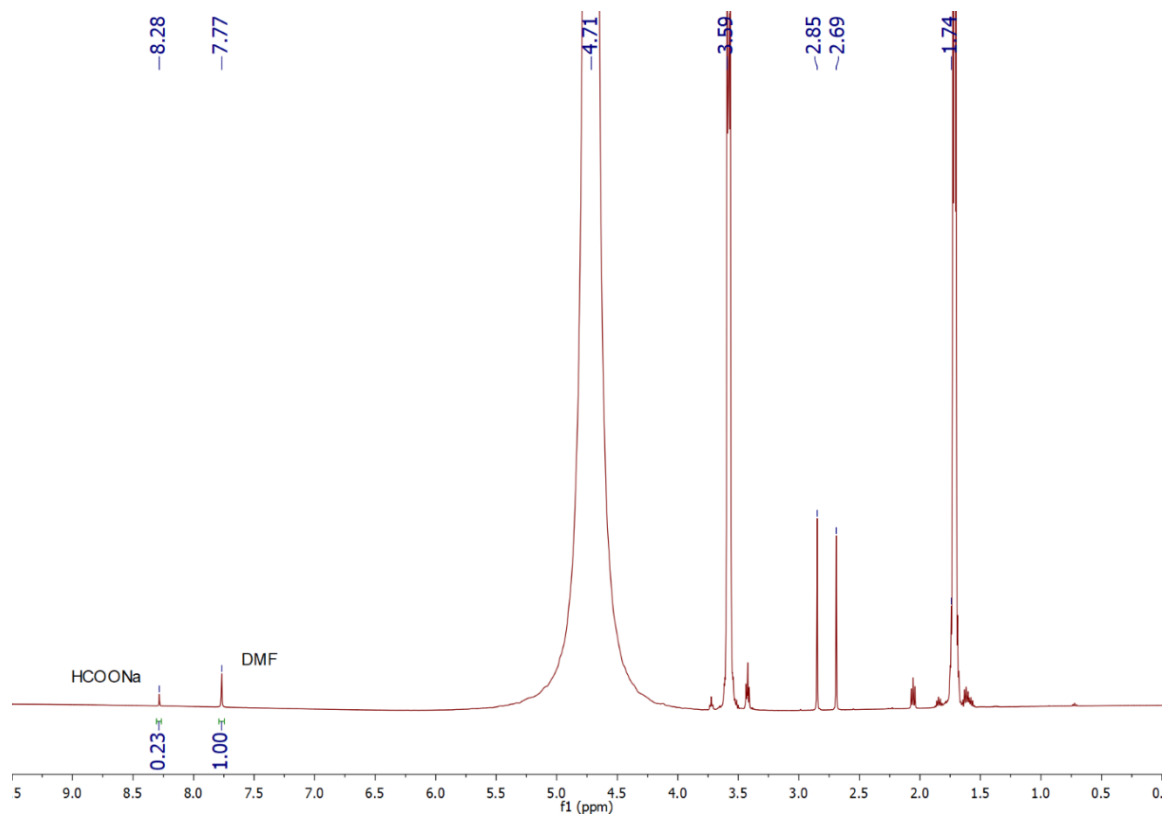

**Figure S23.** Conditions: C-3, NaOH,  $p_{H_2}/p_{CO_2}$  (bar) = 5/15, 130 °C, 24 h, (Table 1, entry 23).

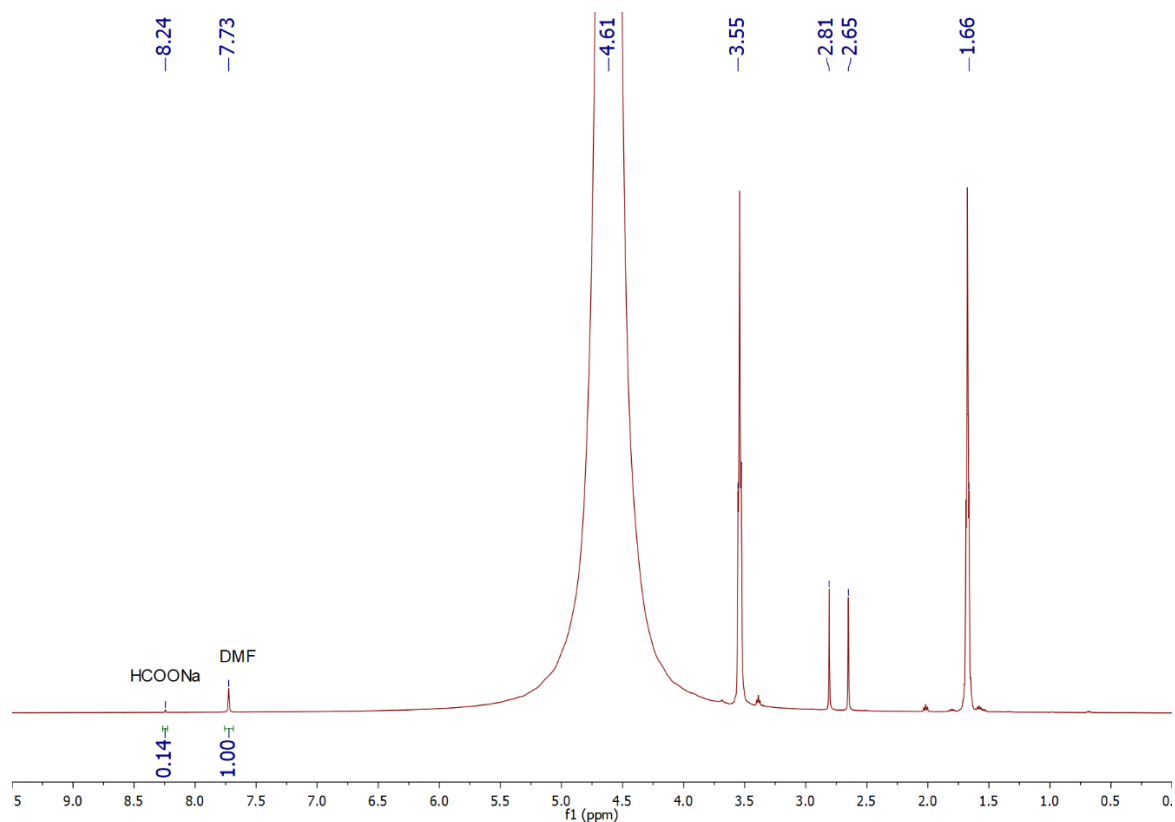

## 2. $^1H$ NMR spectra of catalytic runs for sodium bicarbonate hydrogenation:

**Figure S24.** Conditions: C-3,  $NaHCO_3$  (0.5 mmol), NaOH (0.05 mmol),  $p_{H_2}$  (bar) = 40, 80 °C, 24 h (Table 2, entry 1).

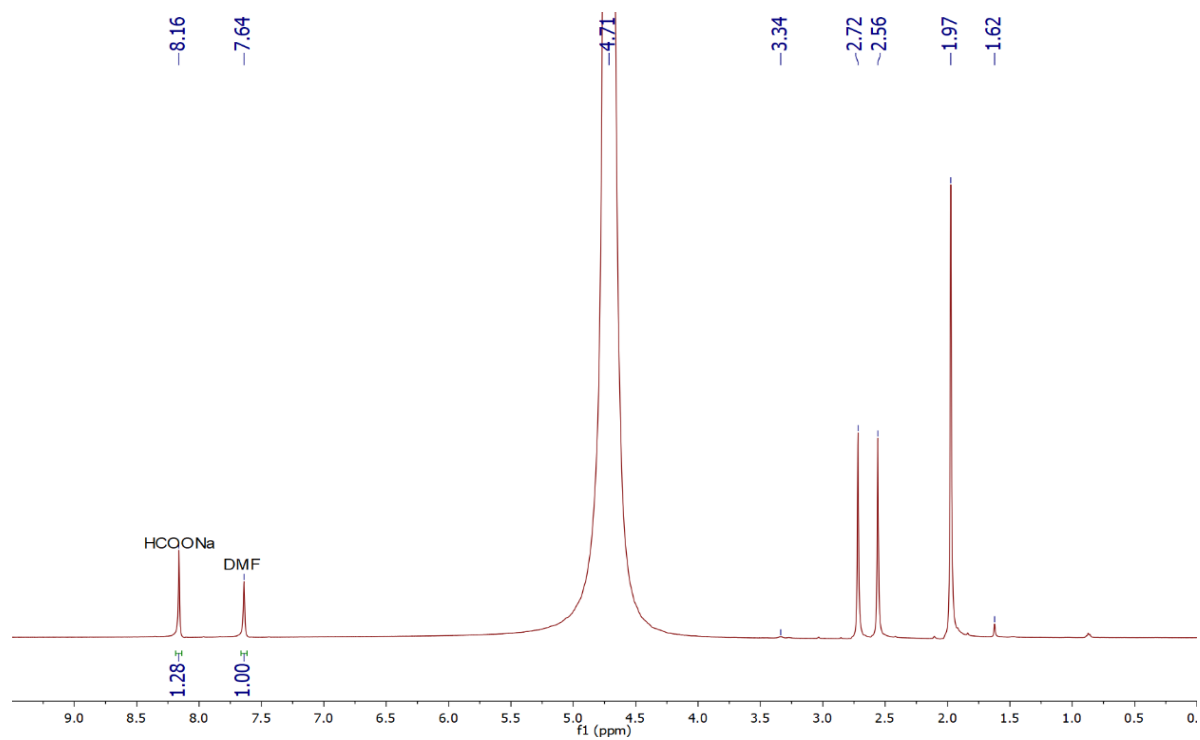

**Figure S25.** Conditions: **C-3**, NaHCO<sub>3</sub> (0.5 mmol), NaOH (0.05 mmol), pH<sub>2</sub> (bar) = 20, 80 °C, 24 h (Table 2, entry 2).

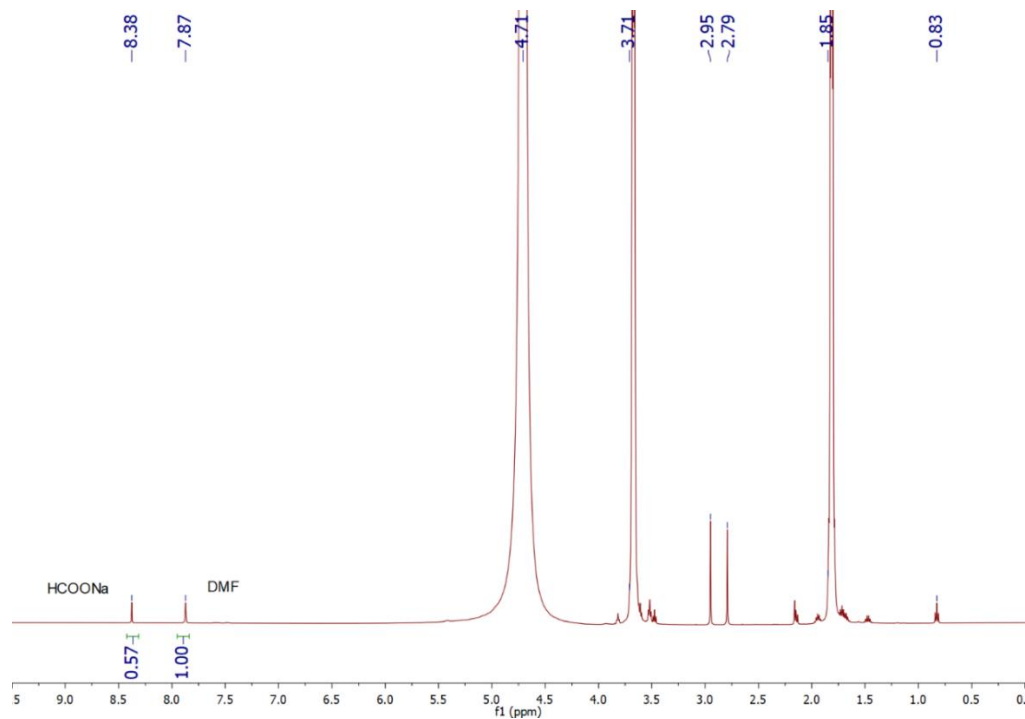

**Figure S26.** Conditions: **C-3**, NaHCO<sub>3</sub> (0.5 mmol), <sup>t</sup>BuOK (0.05 mmol), pH<sub>2</sub> (bar) = 40, 80 °C, 24 h (Table 2, entry 3).

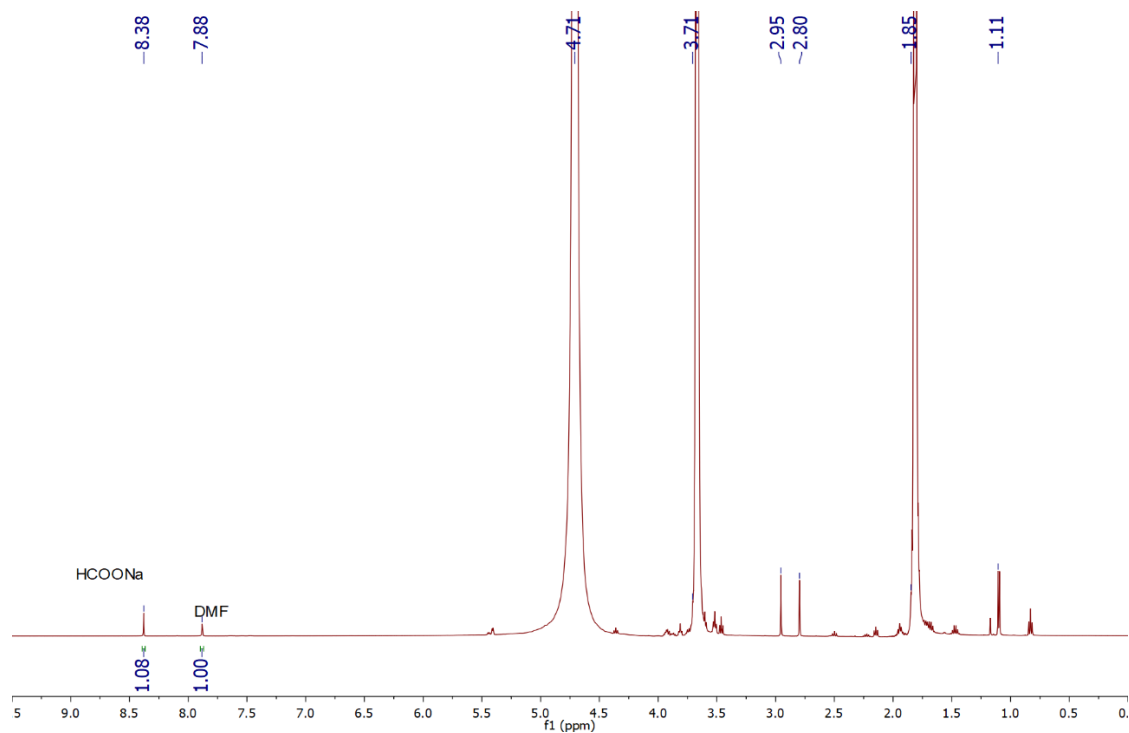

**Figure S27.** Conditions: **C-3**, NaHCO<sub>3</sub> (0.5 mmol), NaOH (0.05 mmol), p<sub>H2</sub> (bar) = 40, 130 °C, 24 h (Table 2, entry 4).

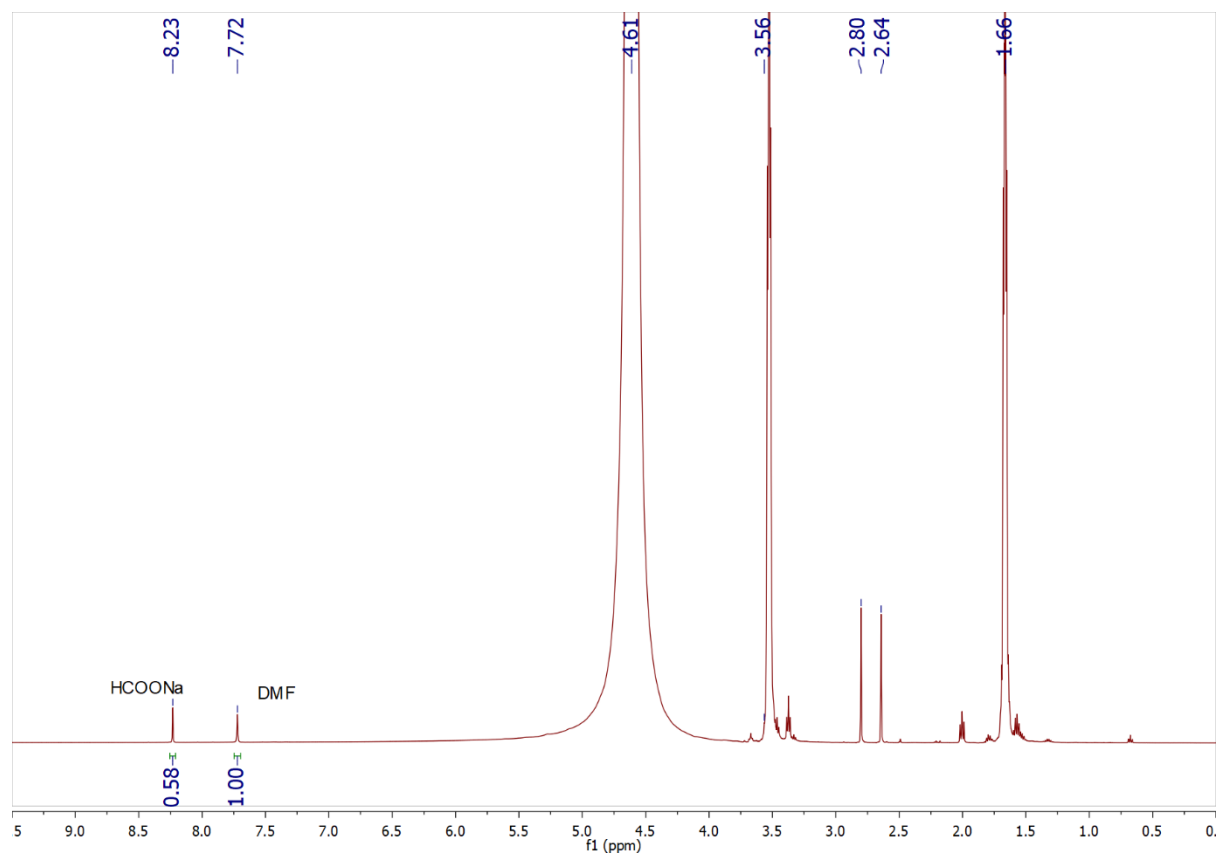

**Figure S28.** Conditions: NaHCO<sub>3</sub> (0.5 mmol), p<sub>H2</sub> (bar) = 40, 80 °C, 24 h (Table 2, entry 5).

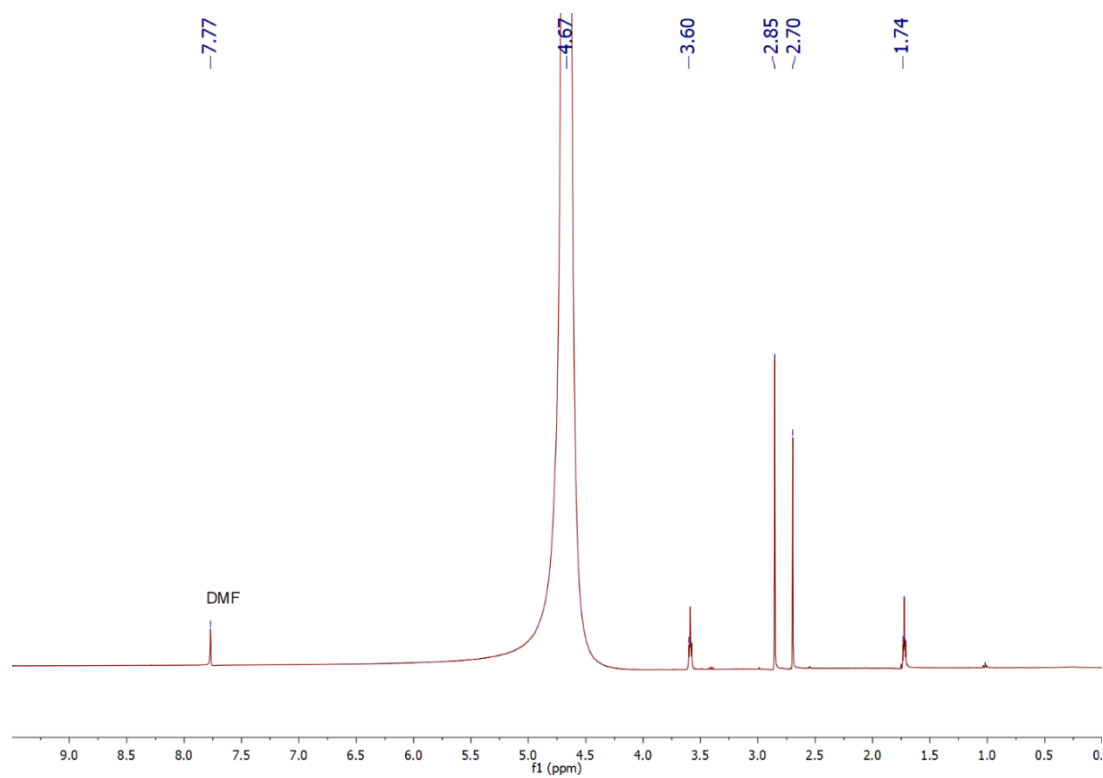

**Figure S29.** Conditions: **C-3**, NaHCO<sub>3</sub> (0.5 mmol), p<sub>H2</sub> (bar) = 20, 80 °C, 24 h (Table 2, entry 6).

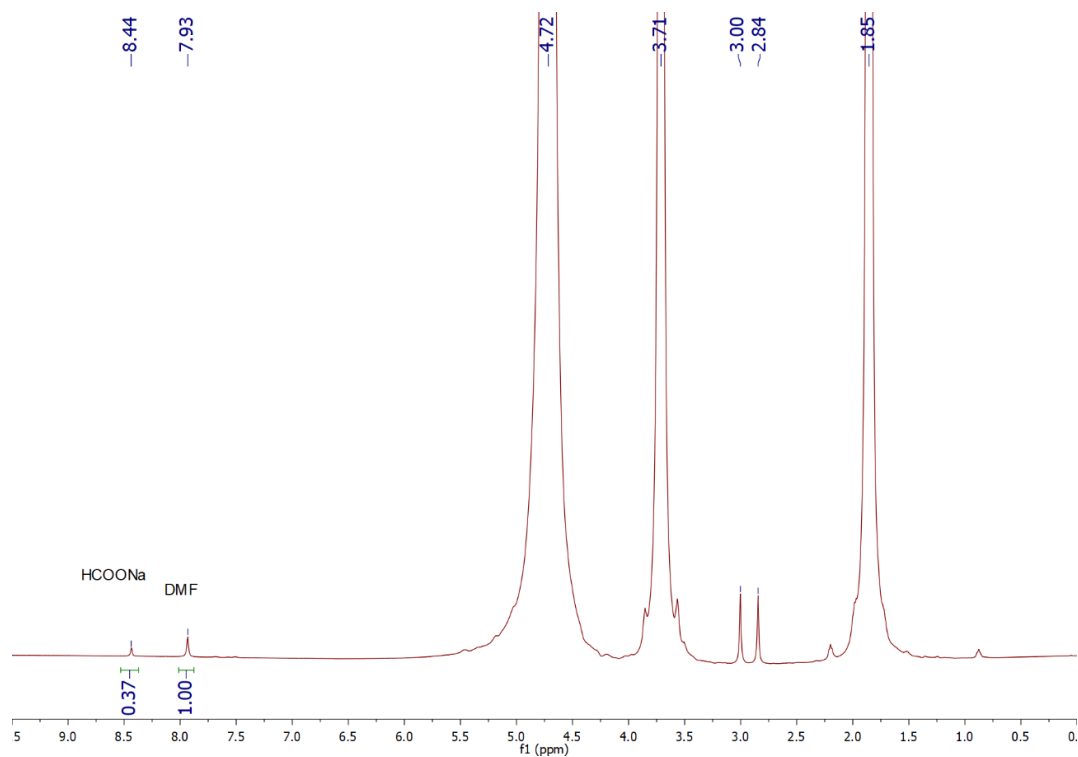

### 3. <sup>1</sup>H NMR spectra of catalytic runs for inorganic carbonate hydrogenation:

**Figure S30.** Conditions: **C-3**, Li<sub>2</sub>CO<sub>3</sub> (0.5 mmol), NaOH (0.05 mmol), p<sub>H2</sub> (bar) = 40, 80 °C, 24 h (Table 3, entry 1).

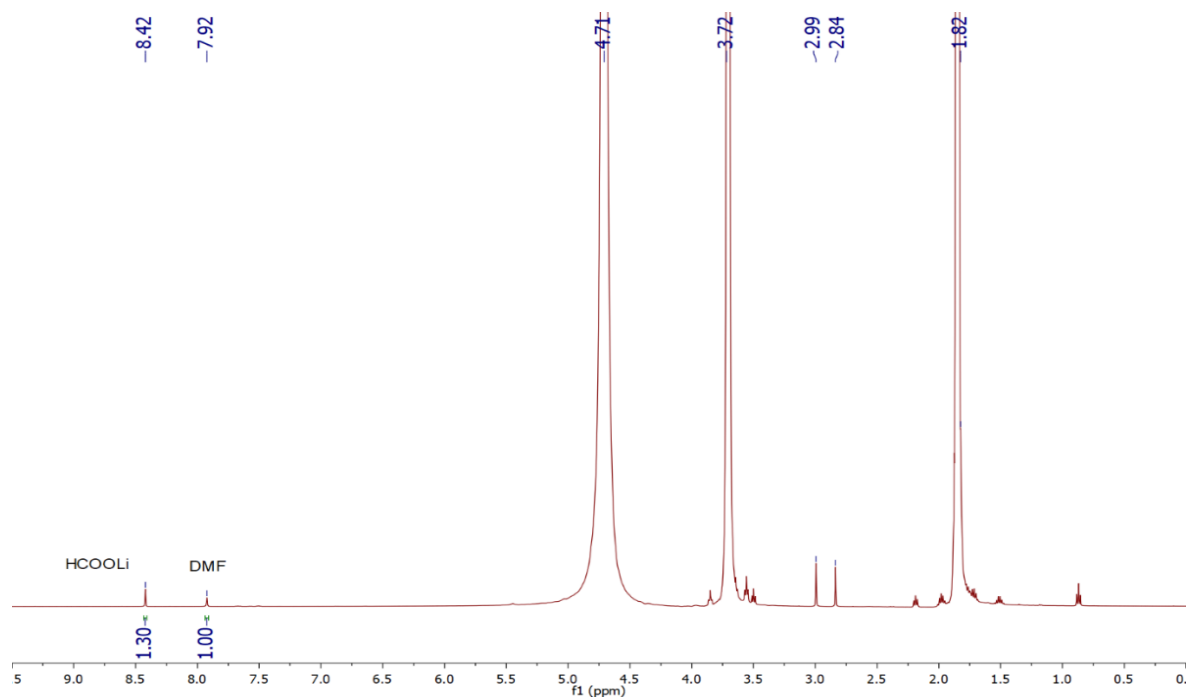



**Figure S31.** Conditions: **C-3**, Na<sub>2</sub>CO<sub>3</sub> (0.5 mmol), NaOH (0.05 mmol), p<sub>H2</sub> (bar) = 40, 80 °C, 24 h (Table 3, entry 2).

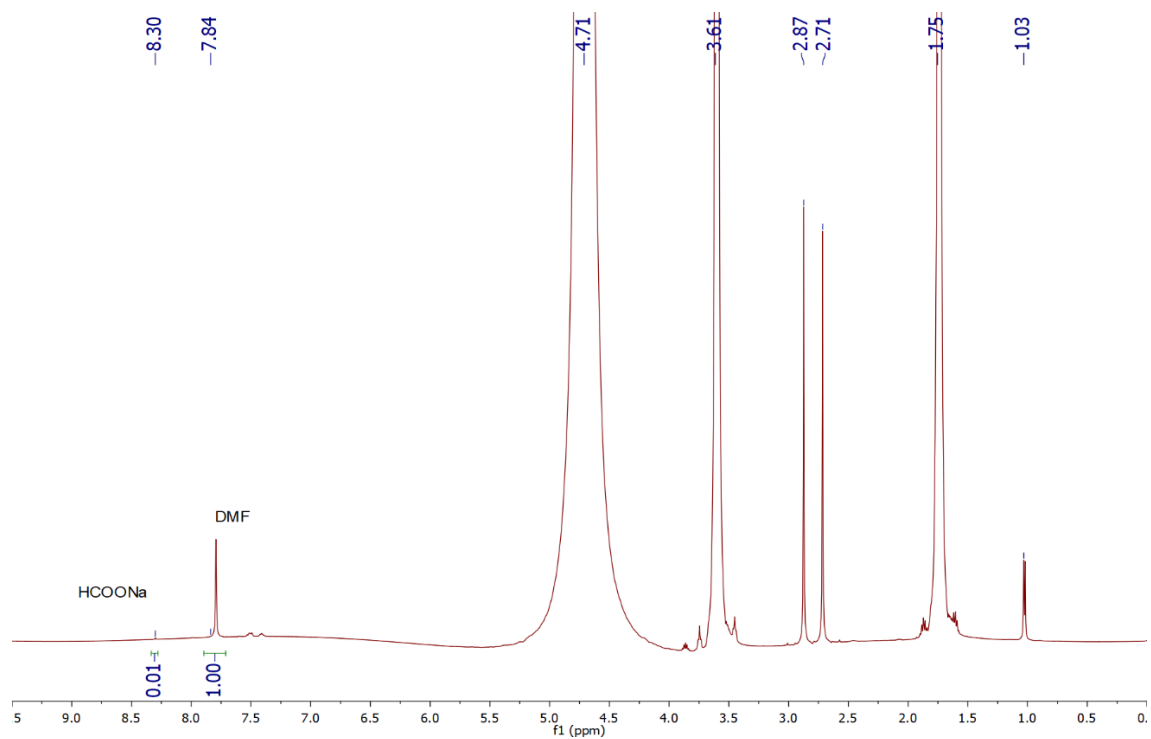

**Figure S32.** Conditions: **C-3**, K<sub>2</sub>CO<sub>3</sub> (0.5 mmol), NaOH (0.05 mmol), p<sub>H2</sub> (bar) = 40, 80 °C, 24 h (Table 3, entry 3).

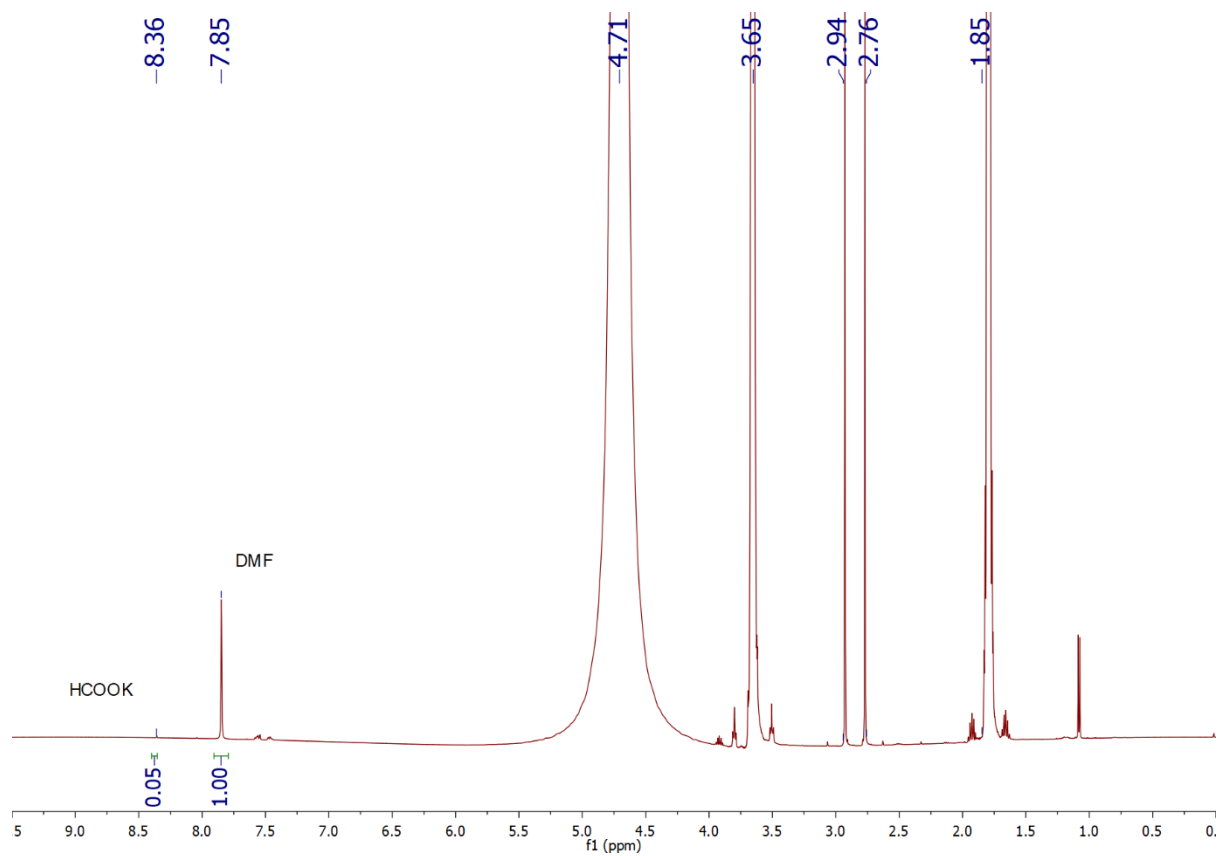

**Figure S33.** Conditions: **C-3**,  $\text{CS}_2\text{CO}_3$  (0.5 mmol), NaOH (0.05 mmol),  $\text{pH}_2$  (bar) = 40, 80 °C, 24 h (Table 3, entry 4).

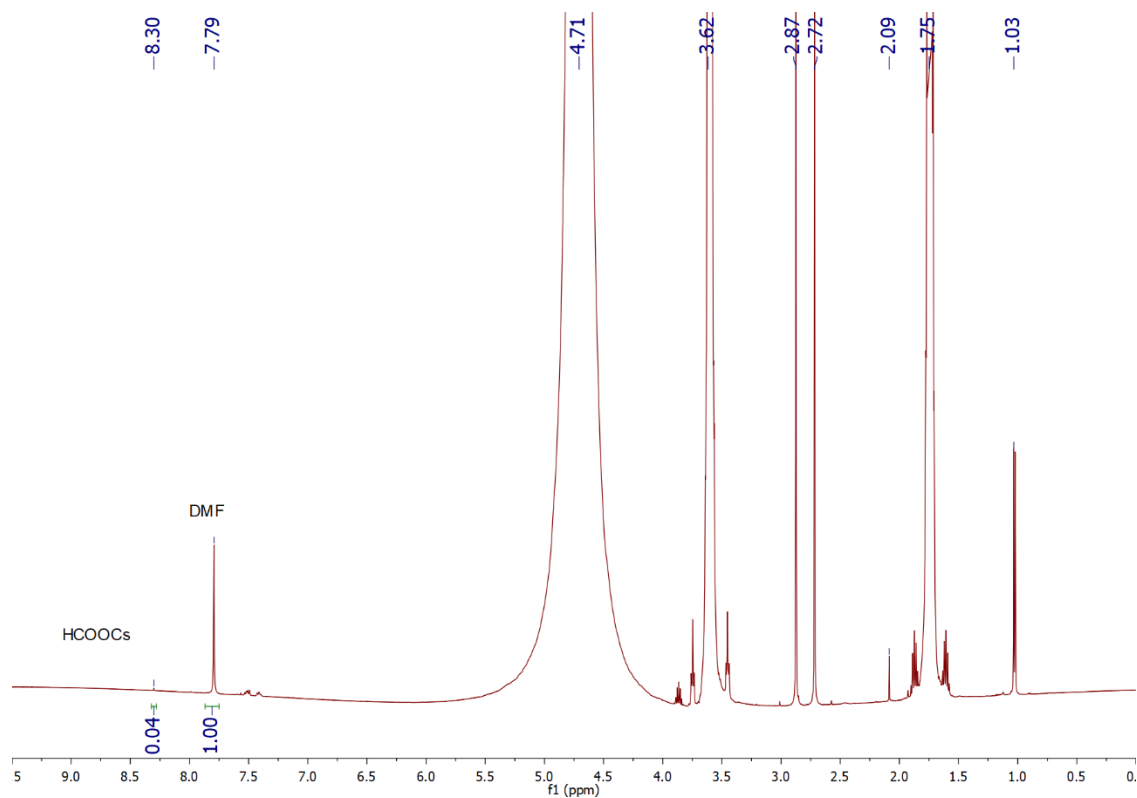

**Figure S34.** Conditions: **C-3**,  $\text{Li}_2\text{CO}_3$  (0.5 mmol),  $\text{pH}_2$  (bar) = 40, 80 °C, 24 h (Table 3, entry 5).

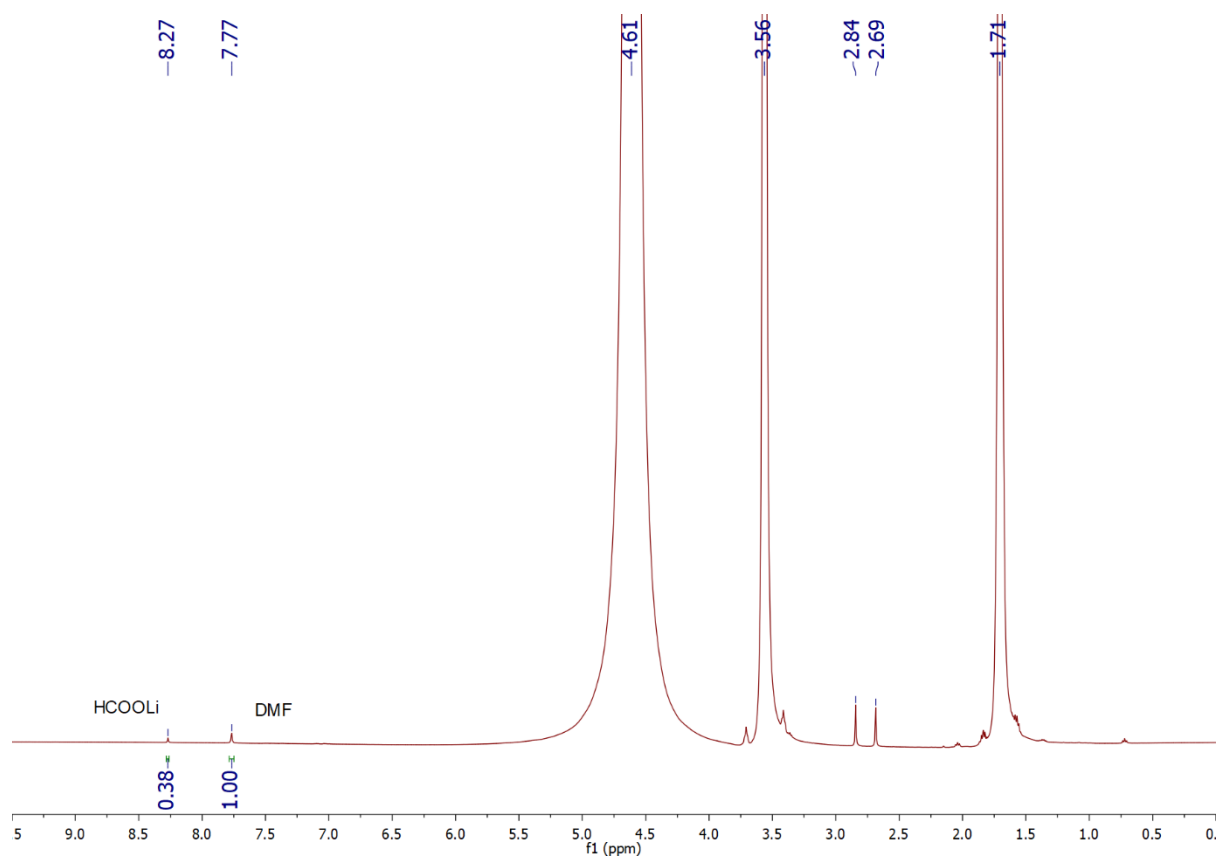

**4. Homogeneity Test:** A drop of mercury was added to the reaction mixture and benchmark reaction was performed under optimized conditions of CO<sub>2</sub> hydrogenation. The TON remained almost unaffected (TON= 900), which confirmed the homogeneous nature of reaction.

**Figure S35.** Conditions: **C-3**, NaOH, p<sub>H<sub>2</sub></sub>/p<sub>CO<sub>2</sub></sub> (bar) = 30/10, 130 °C, 24 h, mercury one drop.

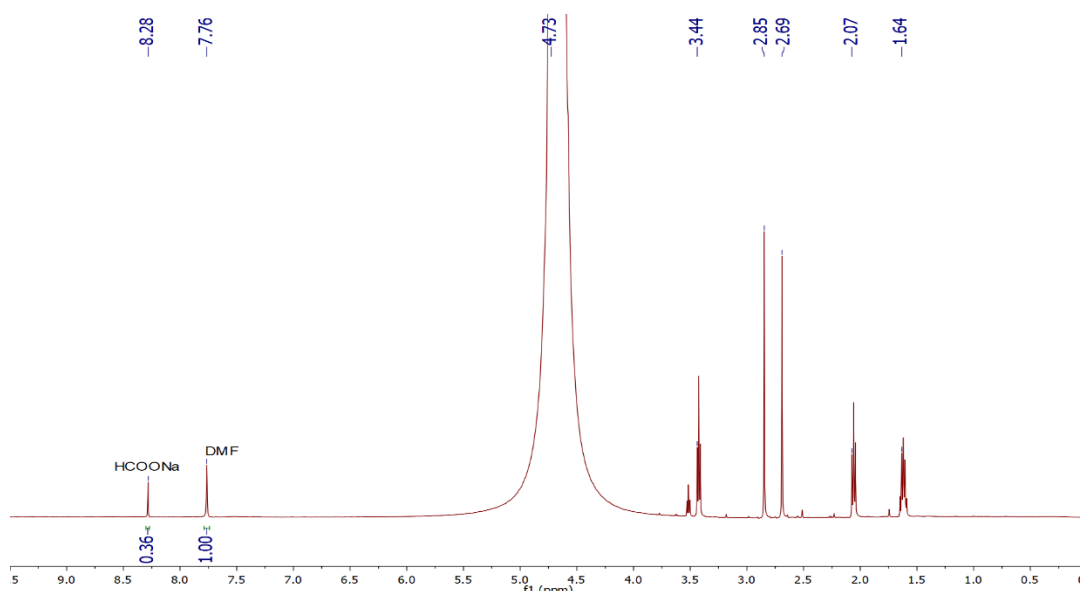

### 5. Mechanistic experiments:

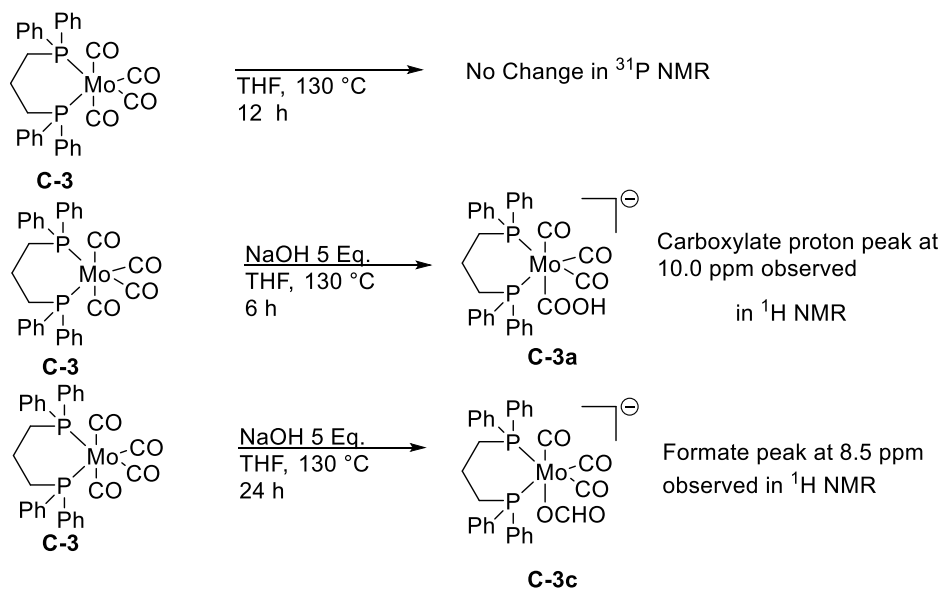

**Figure S36.** Scheme for mechanistic experiments.

**Figure S37.**  $^{31}\text{P}\{^1\text{H}\}$  NMR of **C-3**.

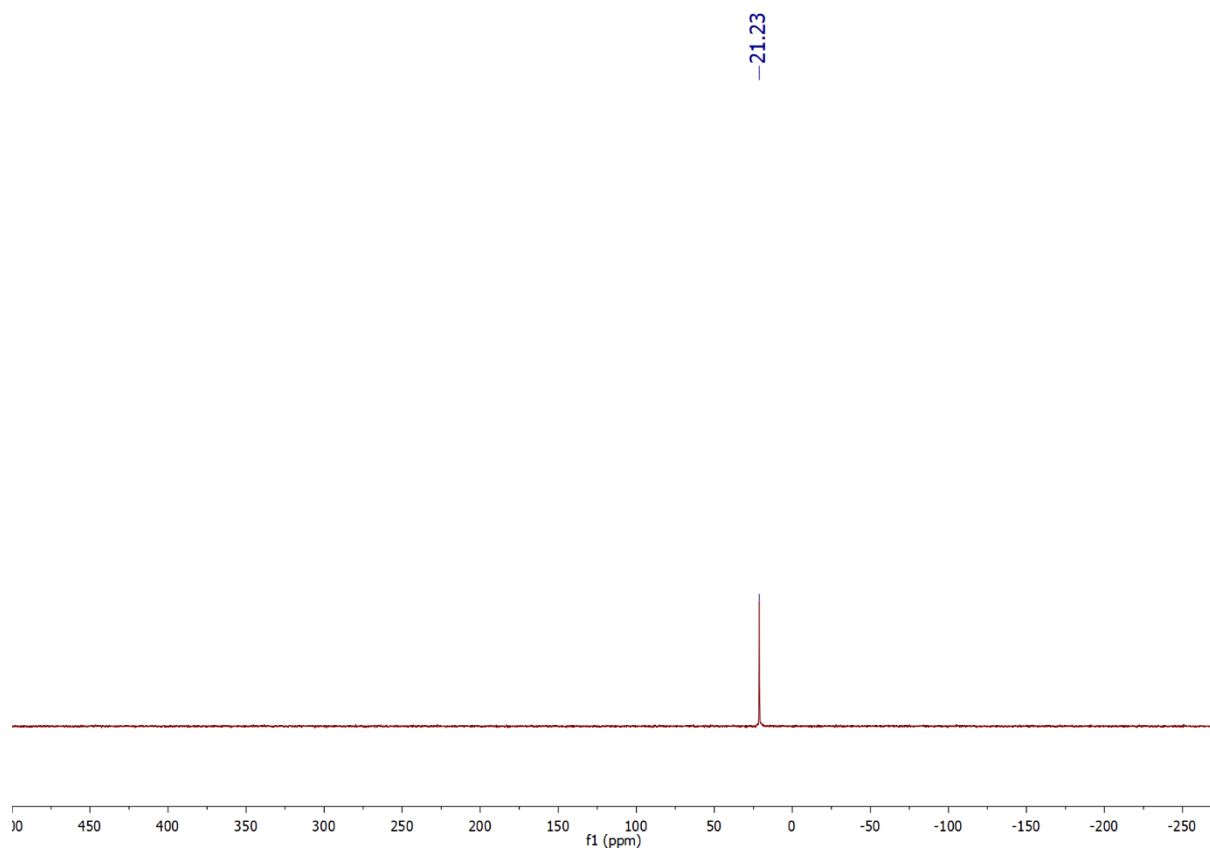

**Figure S38.**  $^1\text{H}$  NMR for **C-3a** after 6-hour reaction time.

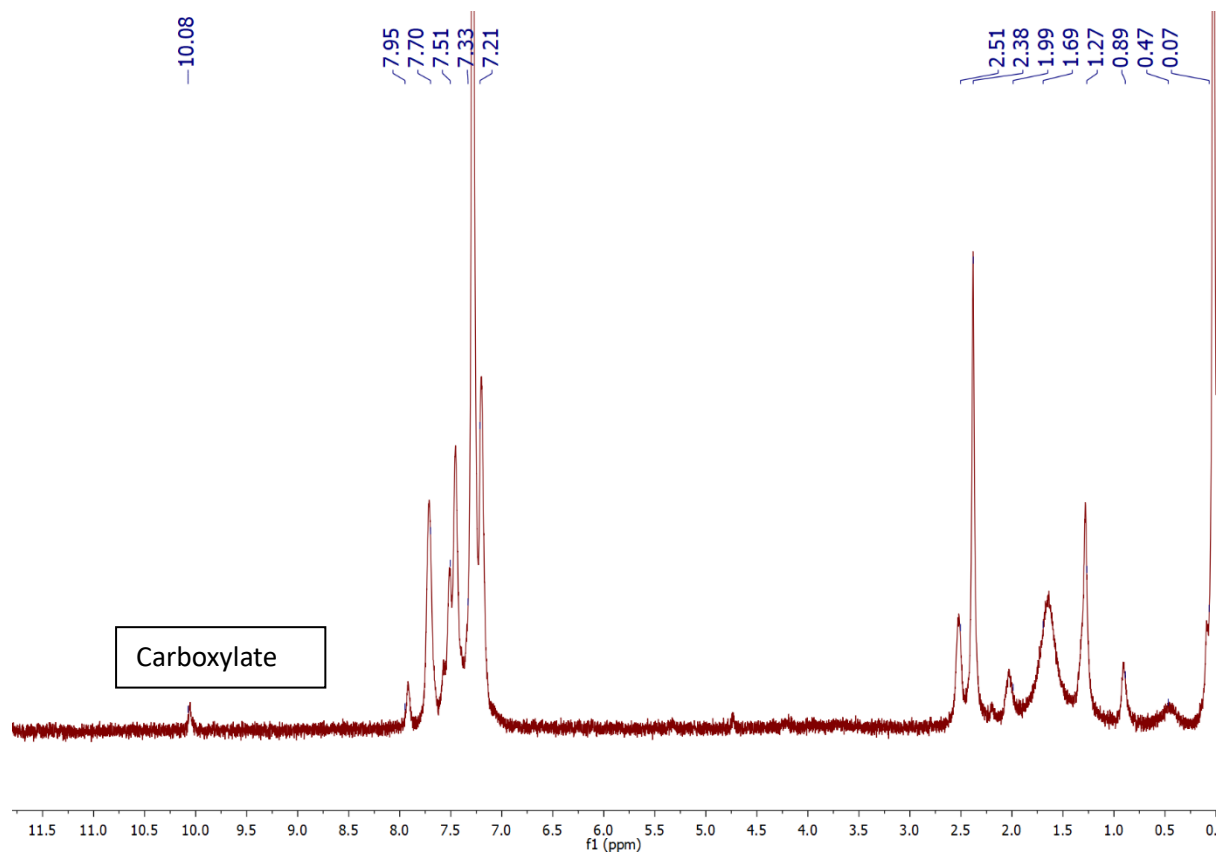

**Figure S39.**  $^{31}\text{P}\{^1\text{H}\}$  NMR taken (in  $\text{CDCl}_3$ ) after 6-hour reaction time.

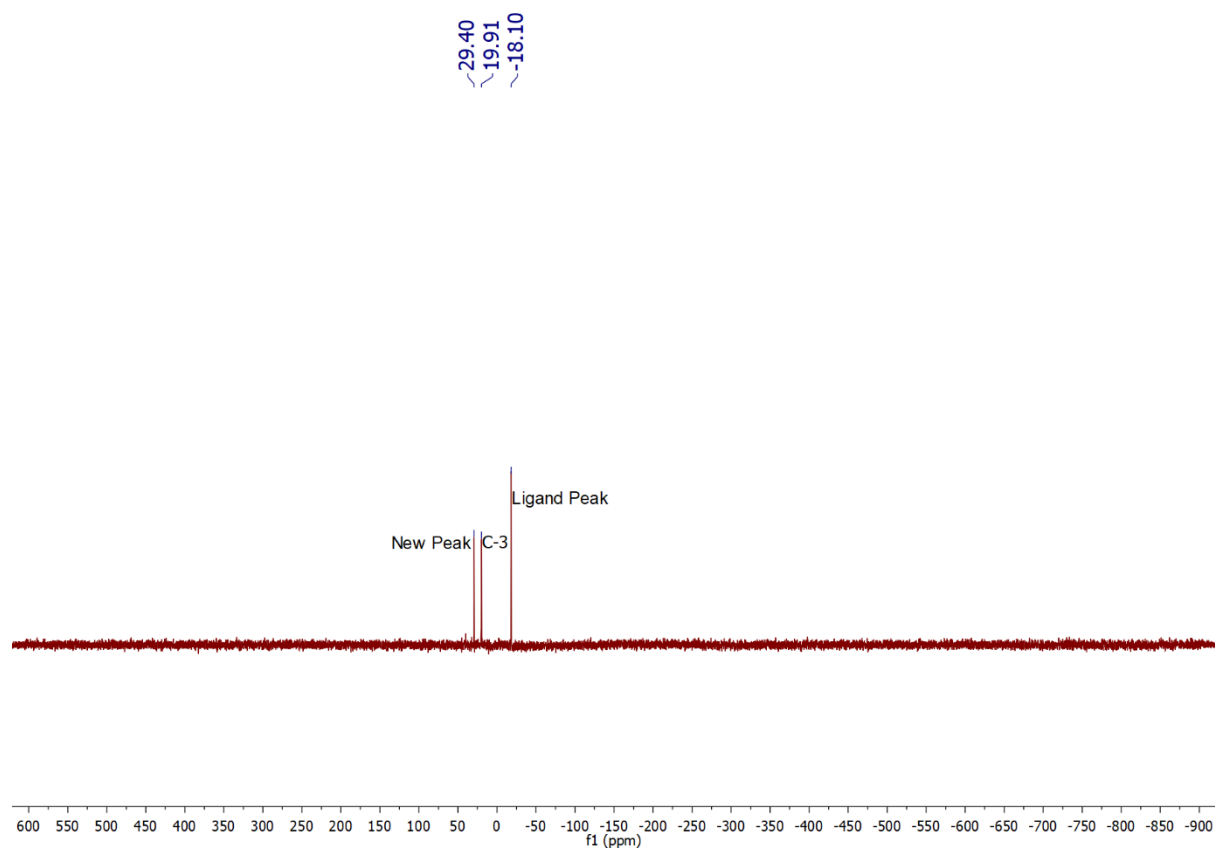

**Figure S40.**  $^1\text{H}$  NMR (taken in  $\text{DMSO}-d_6$ ) after 24 h reaction time.

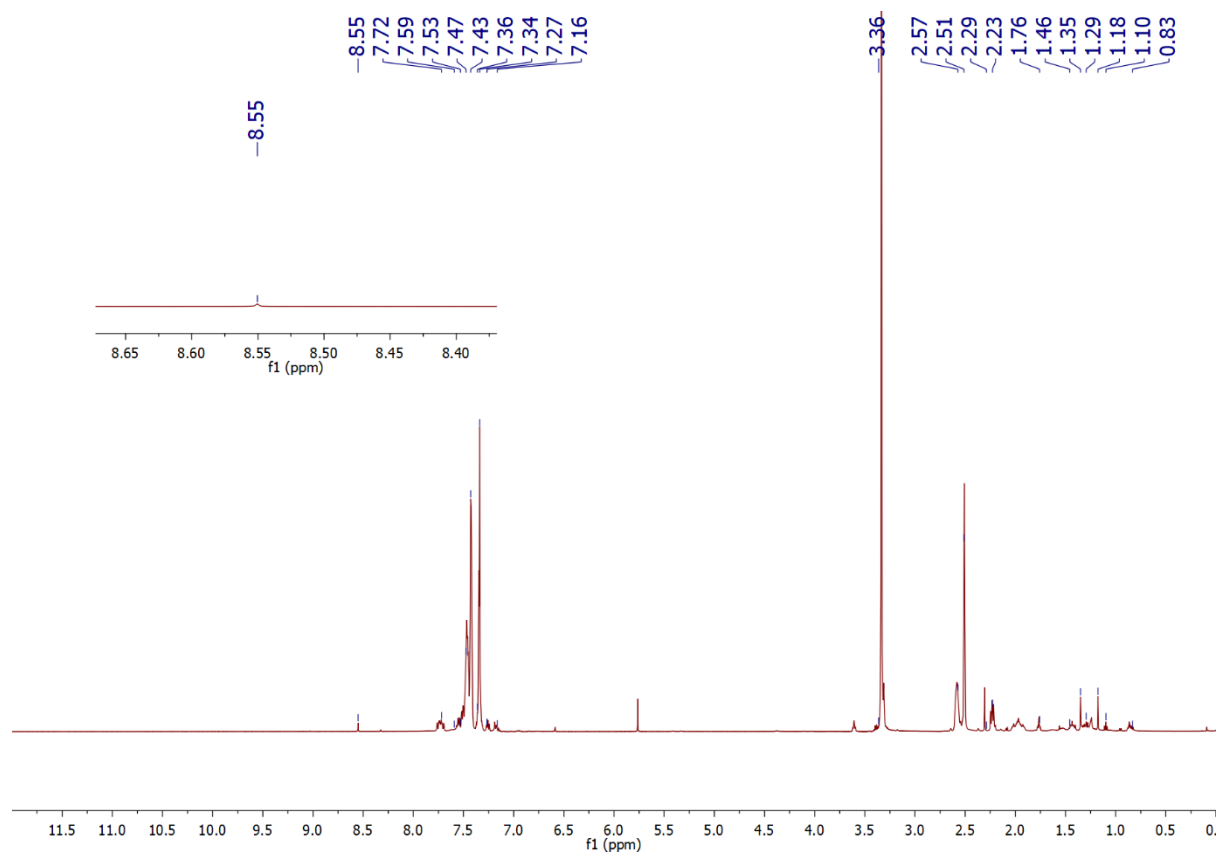

**Figure S41.**  $^{31}\text{P}\{^1\text{H}\}$  NMR taken (taken in DMSO d-6) after 24-hour reaction time.

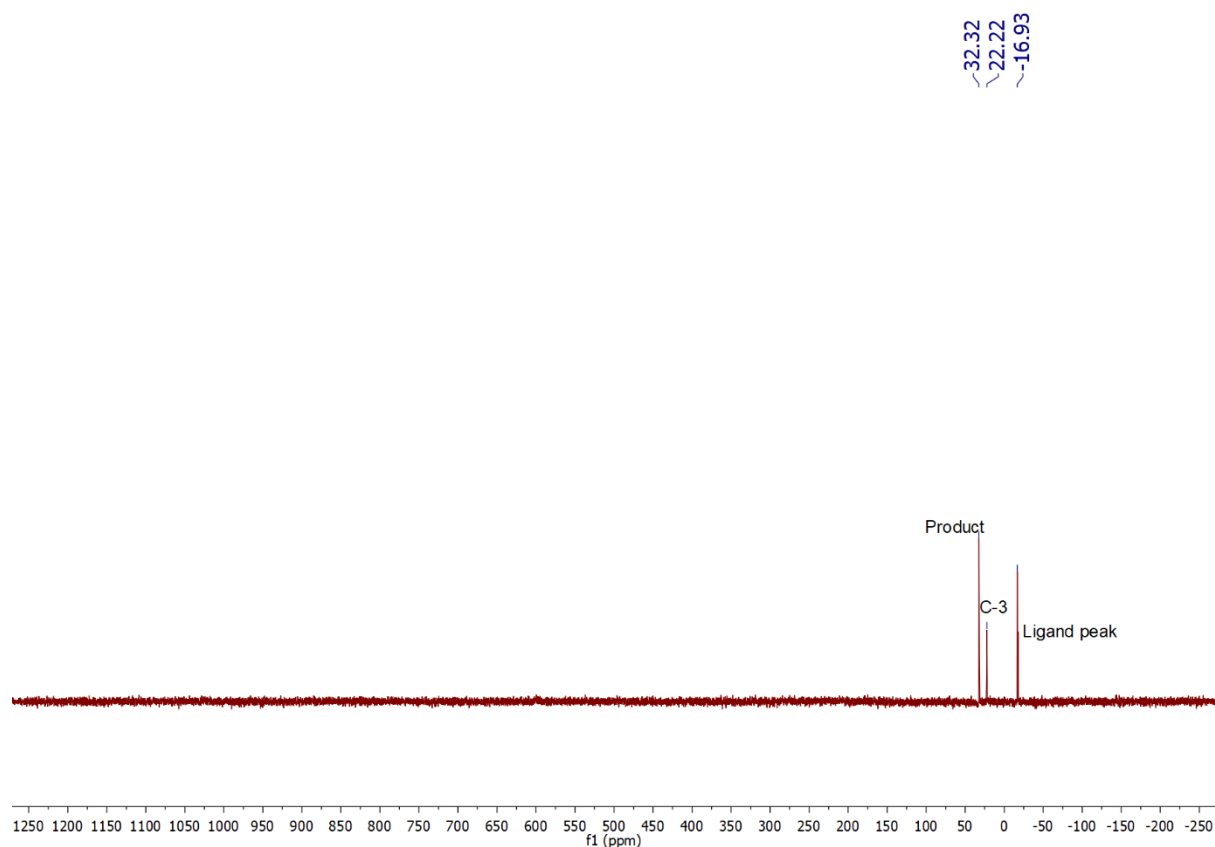

**Figure S42.** Experimental IR Data for carboxylate intermediate complex **C-3a**.

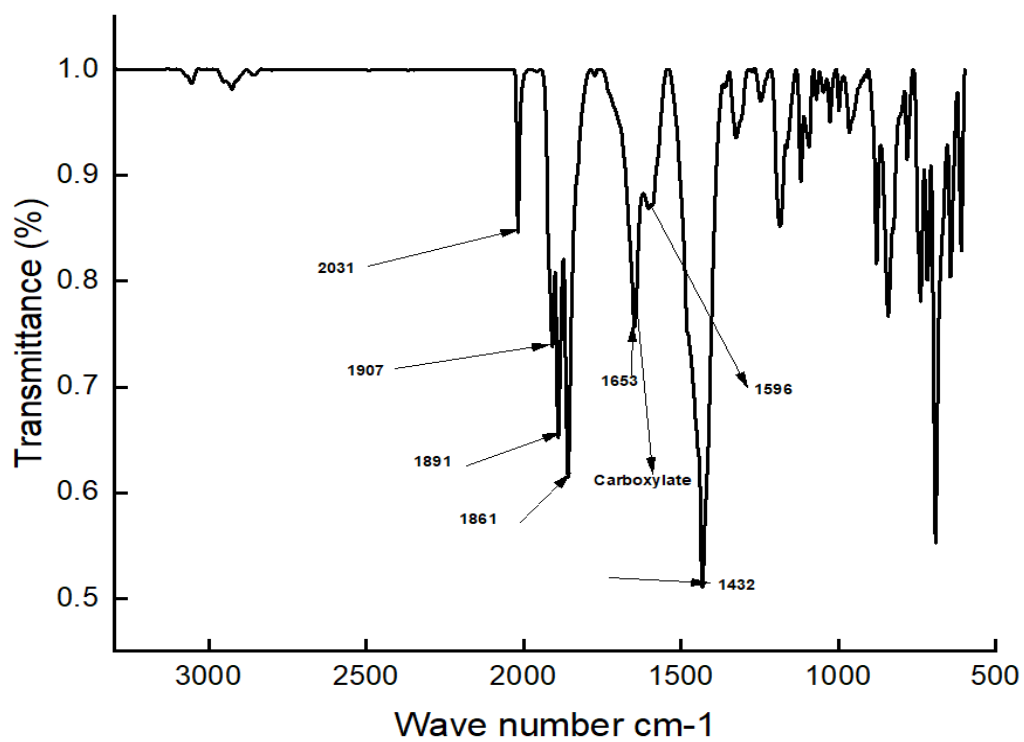

**Figure S43.** HRMS Data for metal formate fragment.

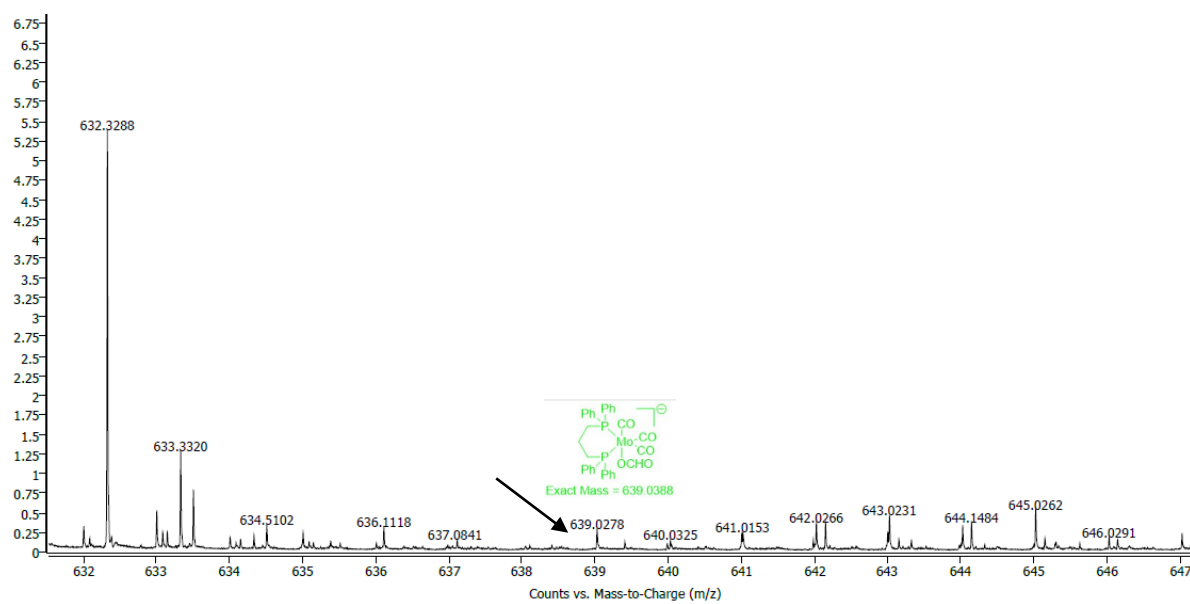

**Figure S44.** Colour before heating the reaction mixture of complex **C-3** and NaOH.

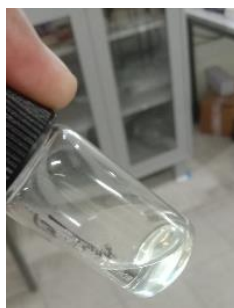

**Figure S45.** Colour after heating the reaction mixture of complex **C-3** and NaOH for 6 h.

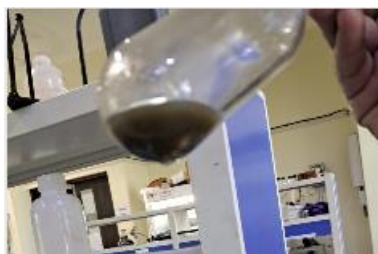

## 6. Characterization data for molybdenum complexes.

### (a) Characterization data of C-1.

Mo(DPPM)(CO)<sub>4</sub> (C-1)

<sup>1</sup>H NMR (500 MHz, CDCl<sub>3</sub>) δ 7.53-7.26 (m, Ar), 4.45(t).

<sup>31</sup>P{<sup>1</sup>H}-NMR (203.0 MHz, CDCl<sub>3</sub>) δ 2.3 (s, 2P).

FT-IR (cm<sup>-1</sup>) ν<sub>CO</sub> = 2016, 1912, 1857.

HRMS of C<sub>29</sub>H<sub>22</sub>MoO<sub>4</sub>P<sub>2</sub>: Calculated 594.0047. Found 594.1570.

**Figure S46.** <sup>1</sup>H NMR for C-1.

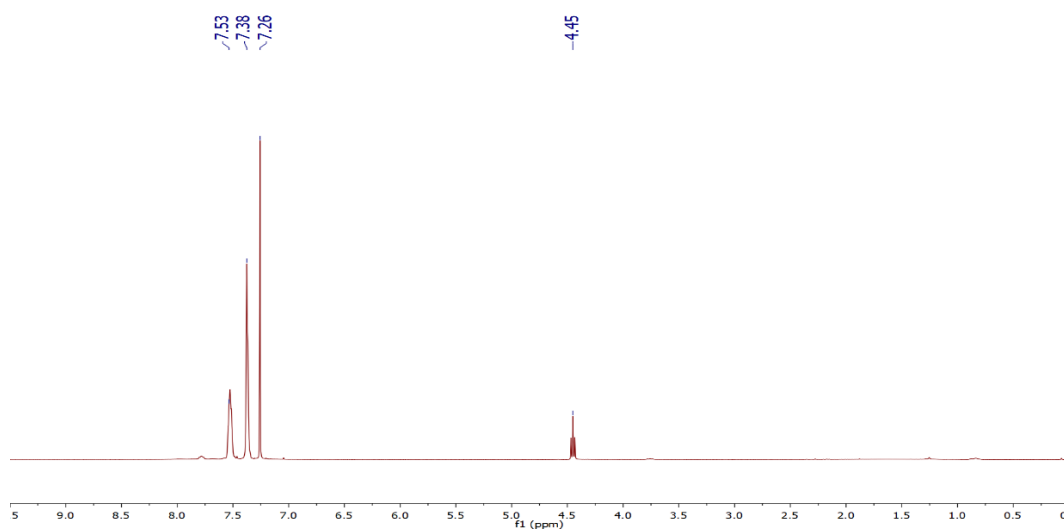

**Figure S47.** <sup>31</sup>P{<sup>1</sup>H} NMR for C-1.

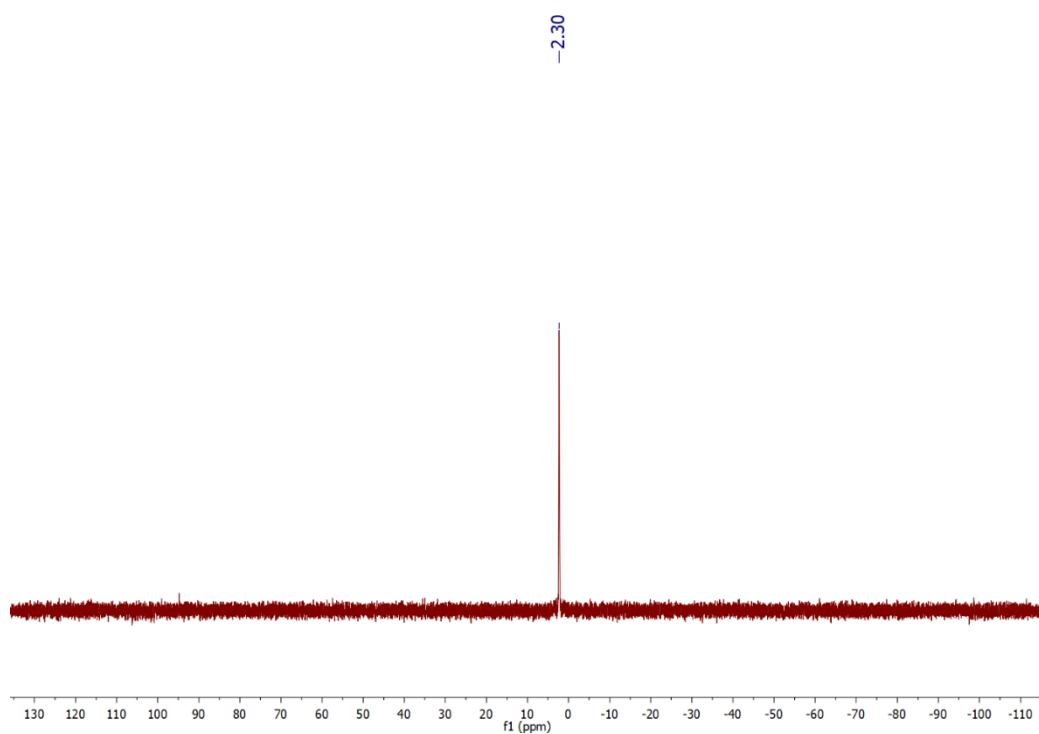



**Figure S48.** IR data for **C-1**.

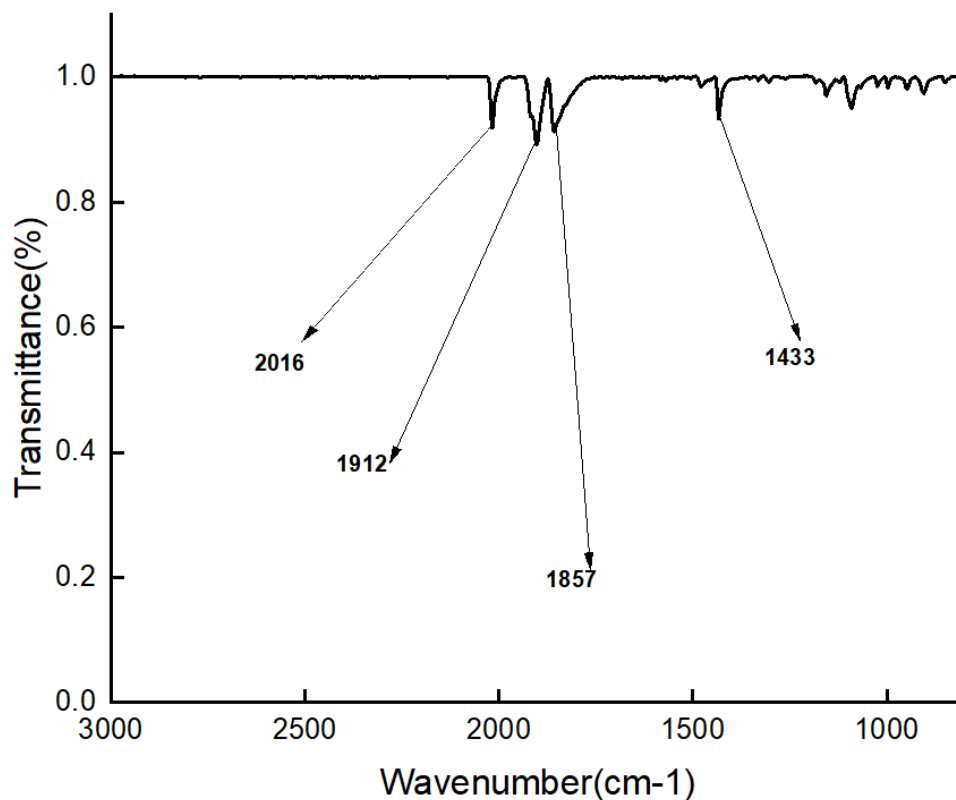

**Figure S49.** HRMS data for **C-1** (Exact mass = 594.0047).

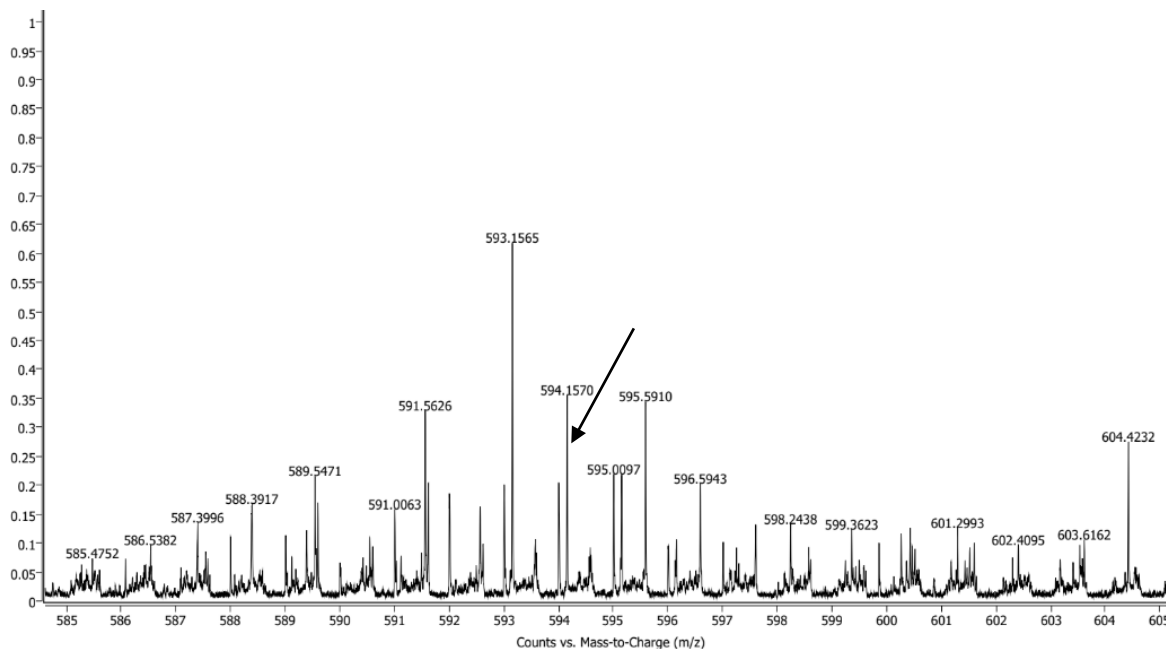

**6(b) Characterization data of C-2.**

**Mo(DPPE)(CO)<sub>4</sub> (C-2)**

<sup>1</sup>H NMR (500 MHz, CDCl<sub>3</sub>) δ 7.64-7.31 (m, Ar), 2.48 (m, 2H), 2.45 (m, 2H).

<sup>31</sup>P{<sup>1</sup>H}-NMR (203.0 MHz, CDCl<sub>3</sub>) δ 55.2 (2P).

FT-IR (cm<sup>-1</sup>) ν(CO) = 2013, 1902, 1869.

HRMS of  $C_{30}H_{24}MoO_4P_2$ : Calculated 608.0204. Found 608.6085.

**Figure S50.**  $^1H$  NMR for **C-2**.

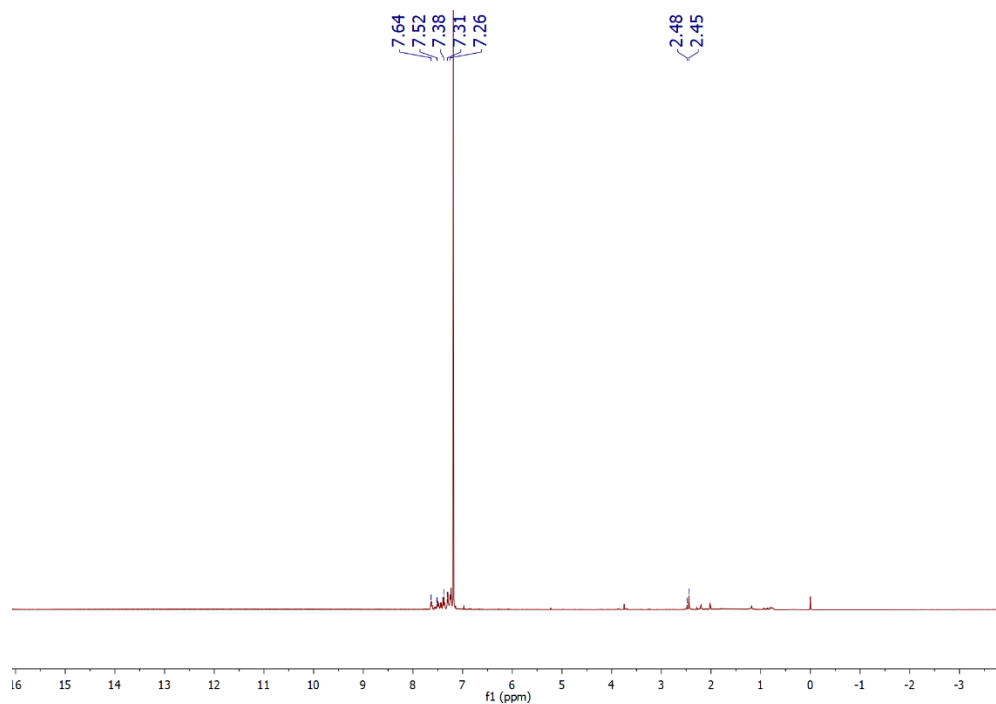

**Figure S51.**  $^{31}P\{^1H\}$  NMR for **C-2**.

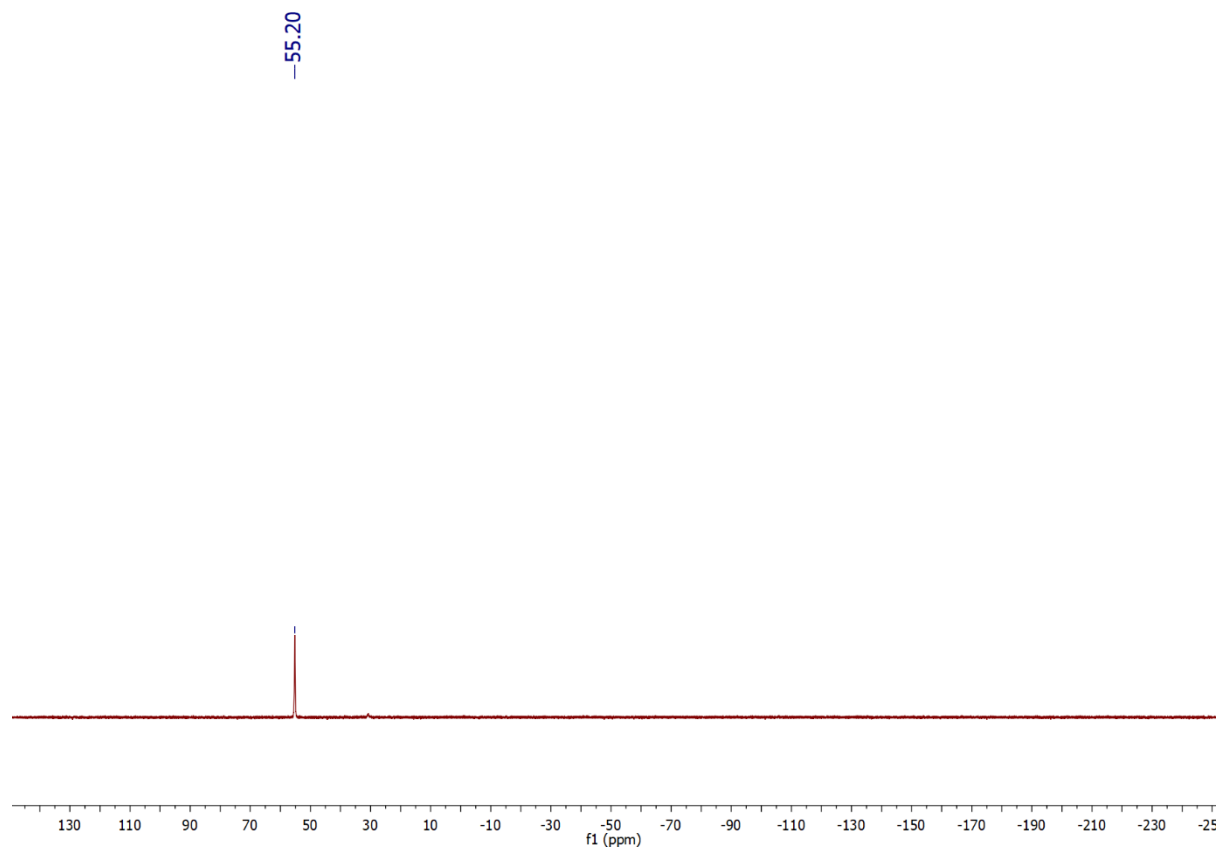

**Figure S52.** IR data for **C-2**.

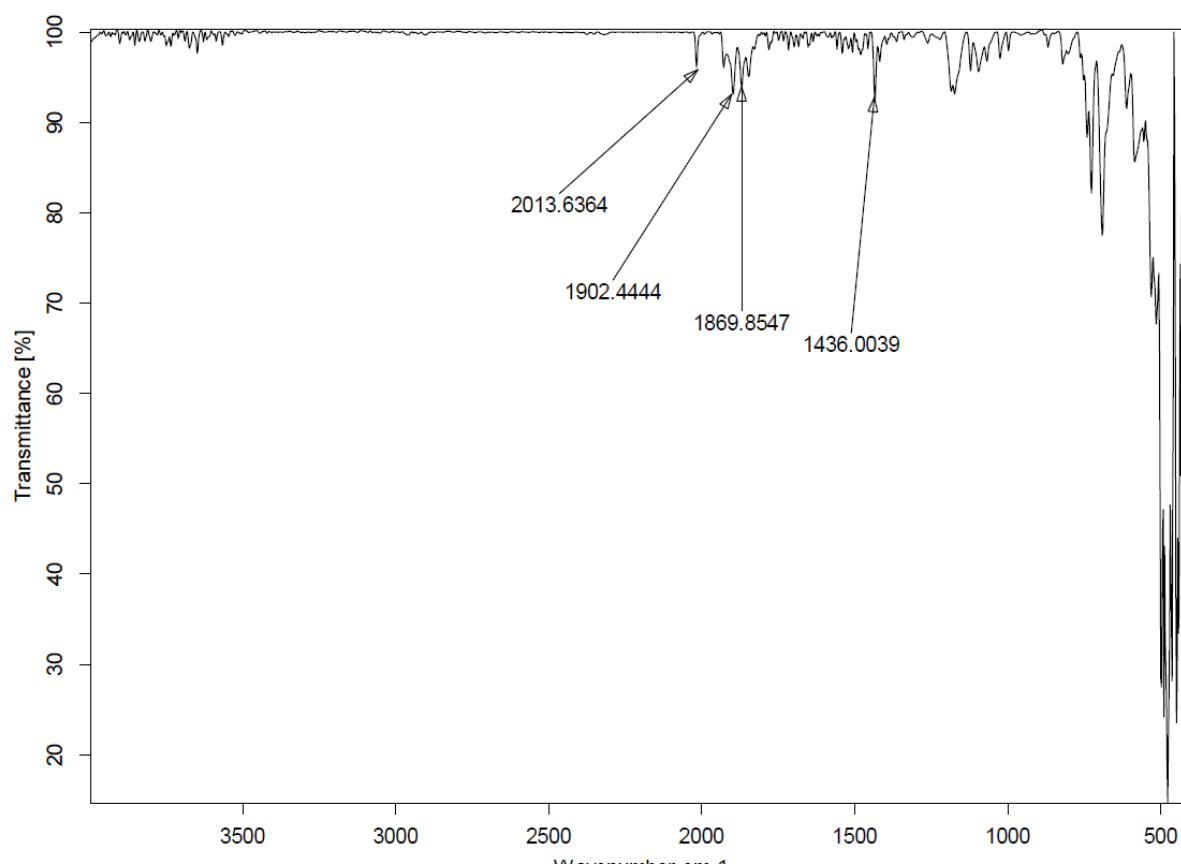

**Figure S53.** HRMS data for **C-2** (Exact mass = 608.0204).

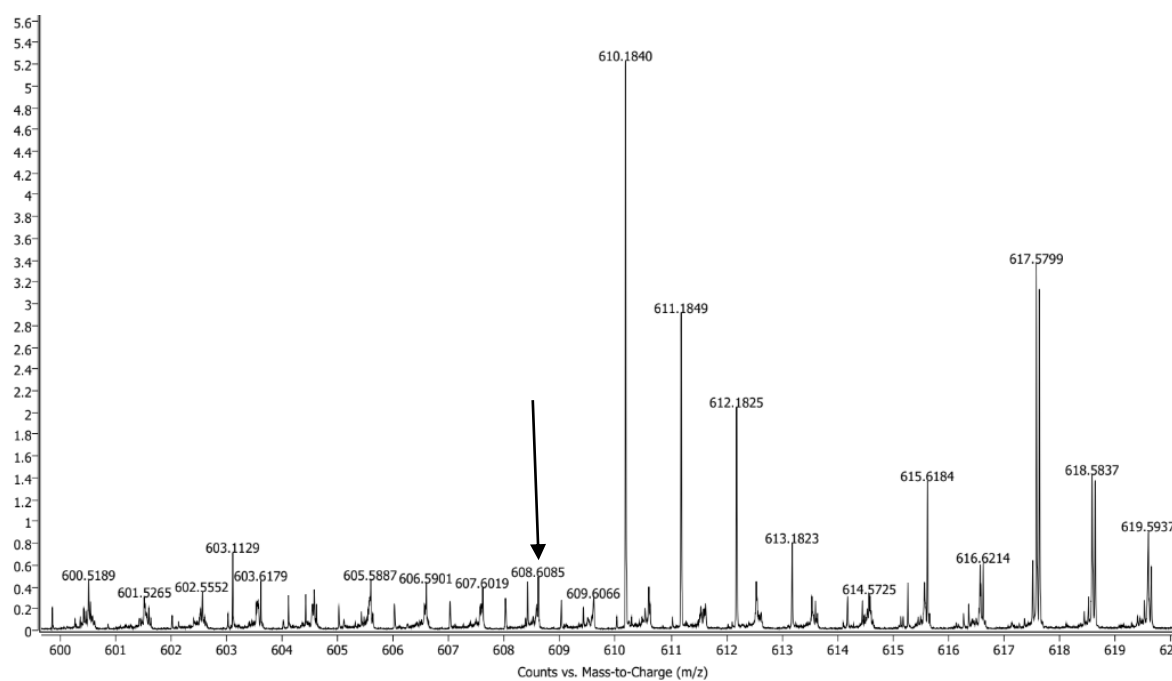

### **6 (c) Characterization data of C-3.**

**Mo(DPPP)(CO)<sub>4</sub> (C-3)**

<sup>1</sup>H NMR (500 MHz, CDCl<sub>3</sub>) δ 7.39-7.19 (m, Ar), 2.38 (m, 4H), 1.90 (2H).

$^{31}\text{P}\{^1\text{H}\}$ -NMR (203.0 MHz,  $\text{CDCl}_3$ )  $\delta$  21.23 (2P).  
FT-IR ( $\text{cm}^{-1}$ )  $\nu(\text{CO}) = 2016, 1905, 1856$ .  
HRMS of  $\text{C}_{31}\text{H}_{26}\text{MoO}_4\text{P}_2$ : Calculated 622.0360. Found 622.0264.

**Figure S54.**  $^1\text{H}$  NMR for C-3.

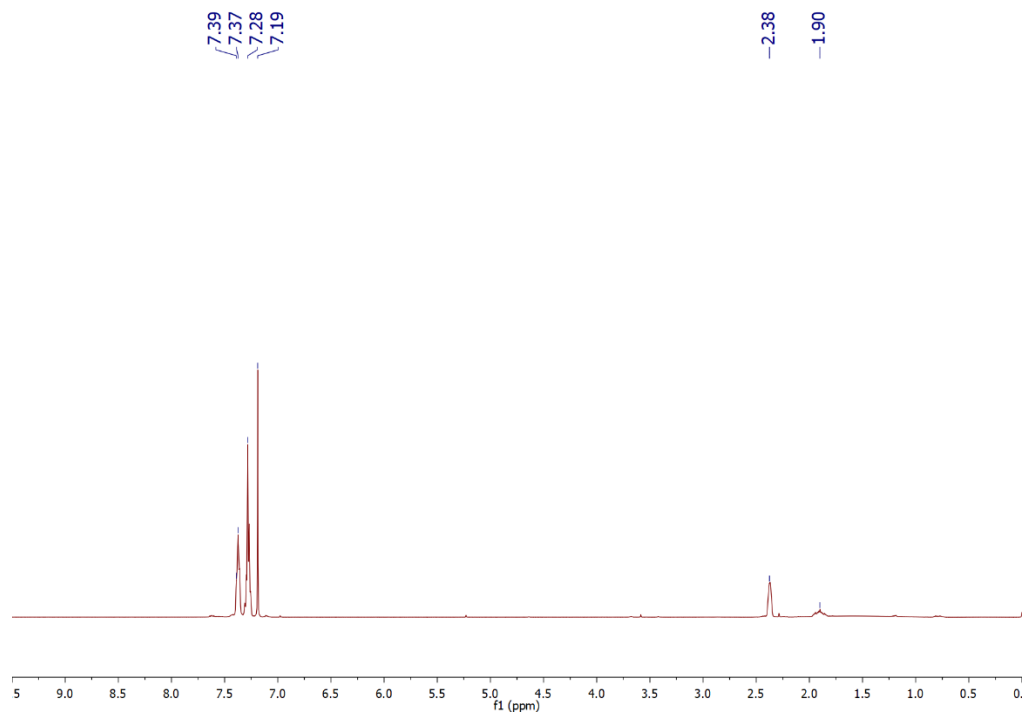

**Figure S55.**  $^{31}\text{P}\{^1\text{H}\}$  NMR for C-3.

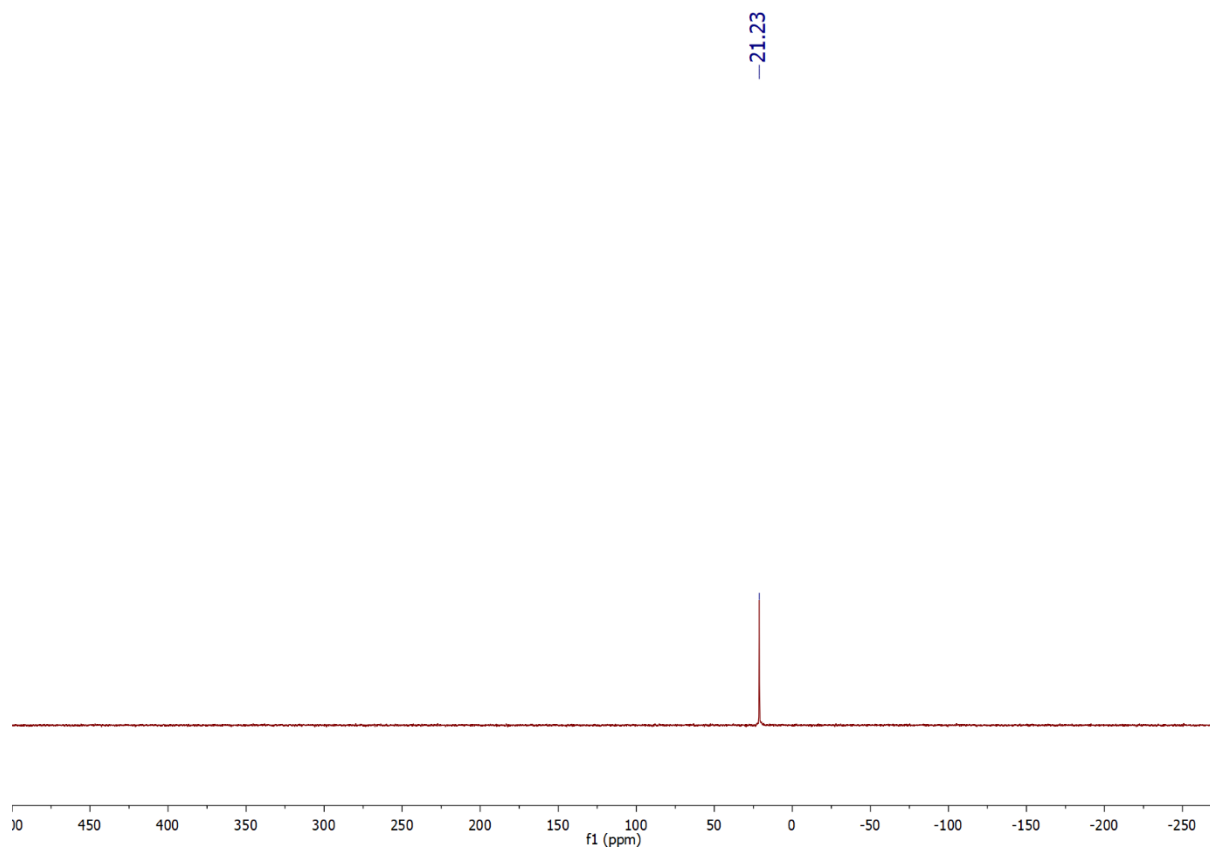

**Figure S56.** IR data for **C-3**.

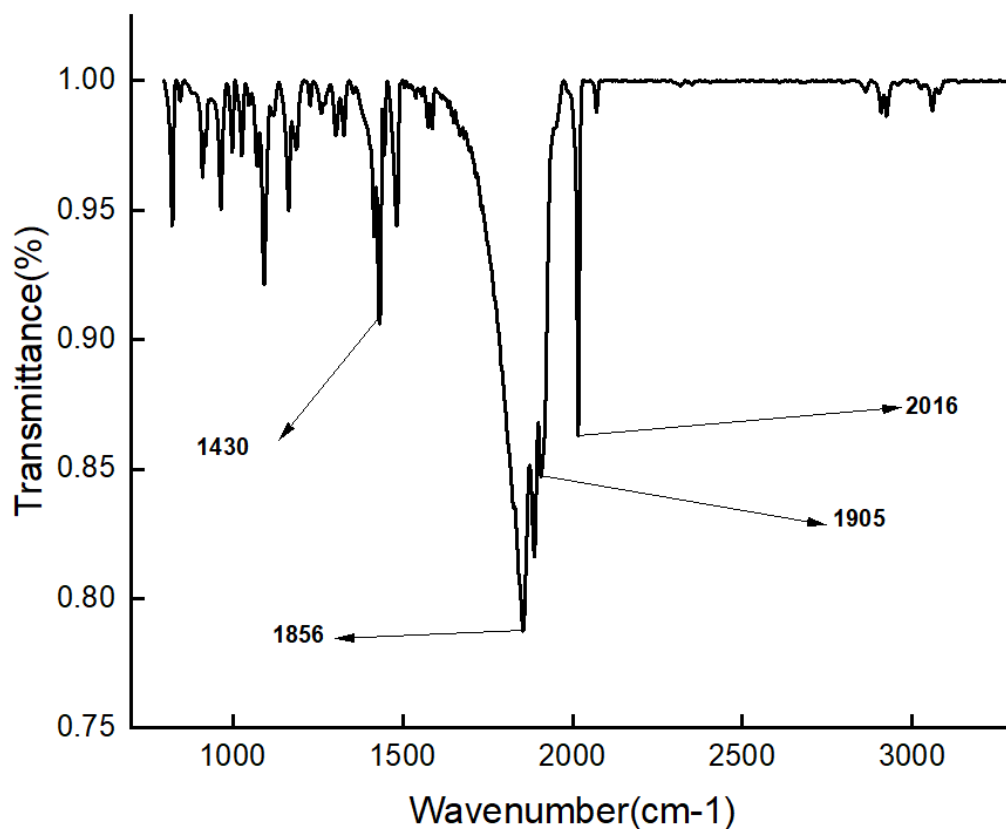

**Figure S57.** HRMS data for **C-3** (Exact mass = 622.0360).

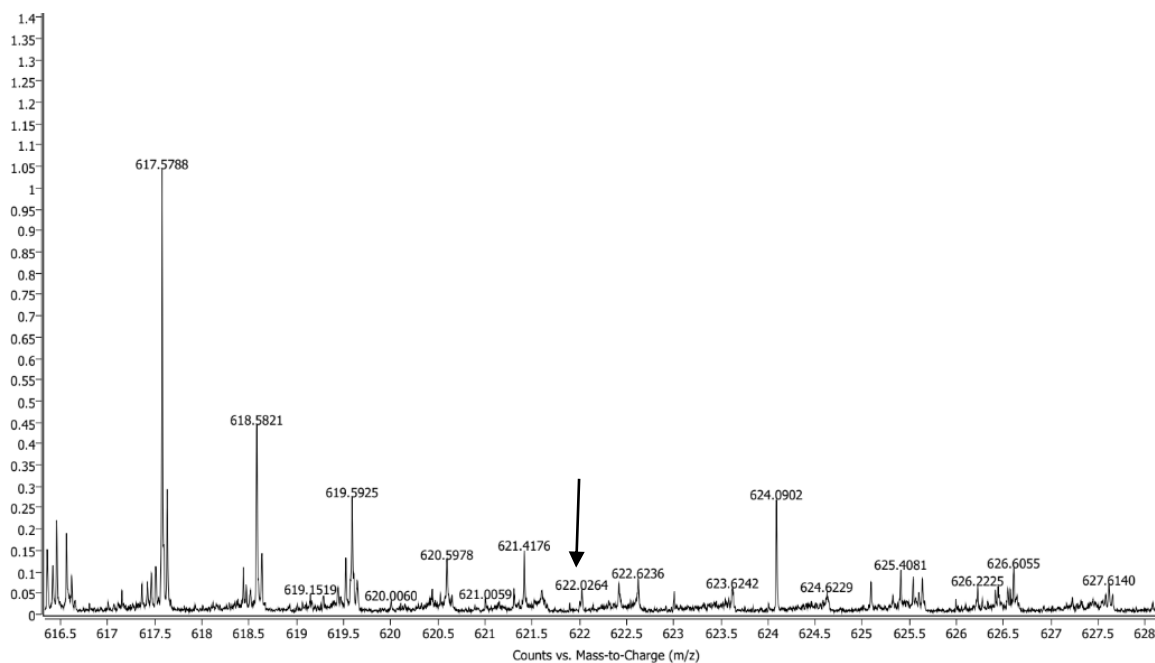

#### 6(d) Characterization data of C-4.

Mo(DPPF)(CO)<sub>4</sub> (C-4)

<sup>1</sup>H NMR (500 MHz, CDCl<sub>3</sub>) δ 7.26-7.60 (m, Ar), 4.25 (m, 8H).

<sup>31</sup>P{<sup>1</sup>H}-NMR (203.0 MHz, CDCl<sub>3</sub>) δ 33.24 (2P).

FT-IR (cm<sup>-1</sup>) ν(CO) = 2020, 1891, 1878.

HRMS of C<sub>40</sub>H<sub>34</sub>FeMoO<sub>4</sub>P<sub>2</sub>: Calculated 794.0330. Found 794.8298.

Figure S58. <sup>1</sup>H NMR for C-4.

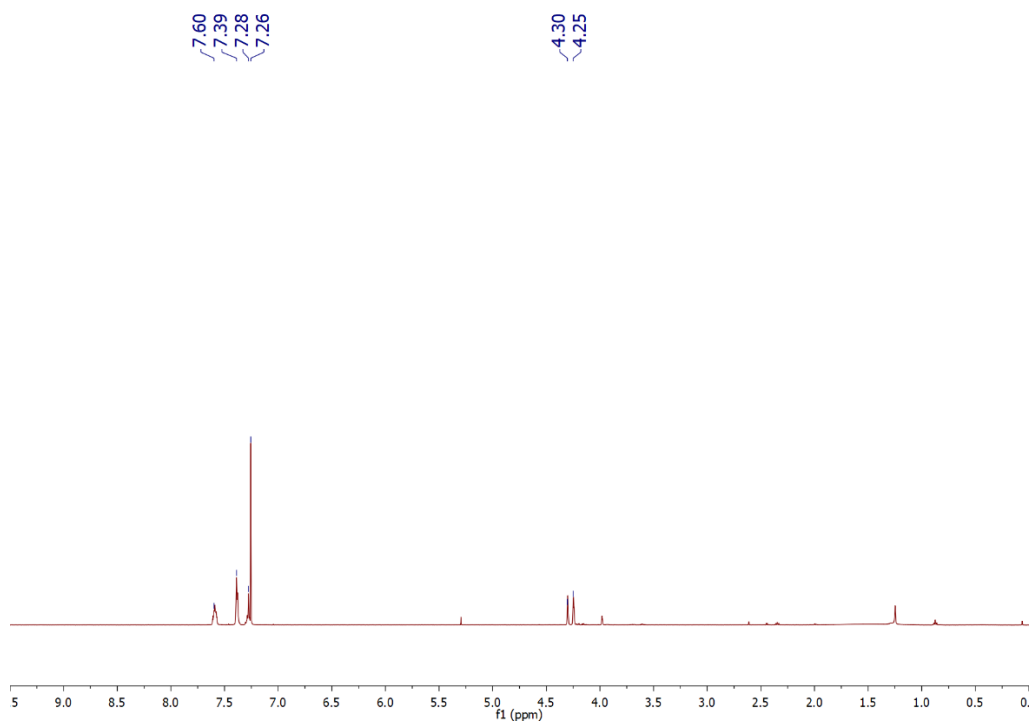

Figure S59. <sup>31</sup>P{<sup>1</sup>H} NMR for C-4.

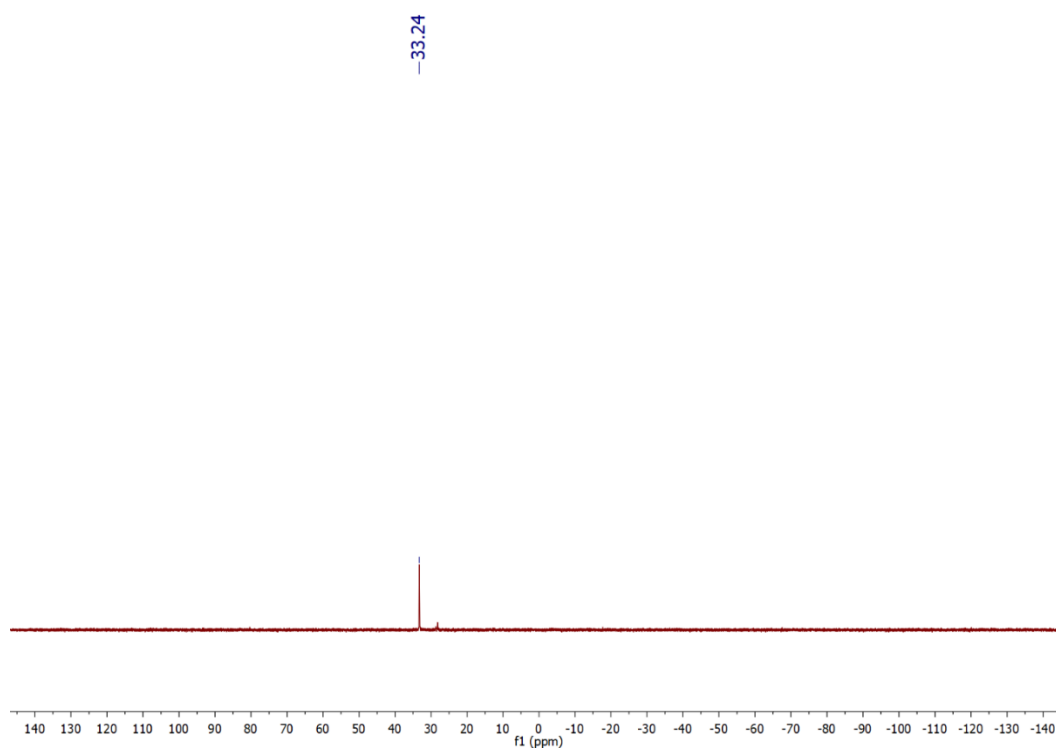

**Figure S60.** IR data for **C-4**.

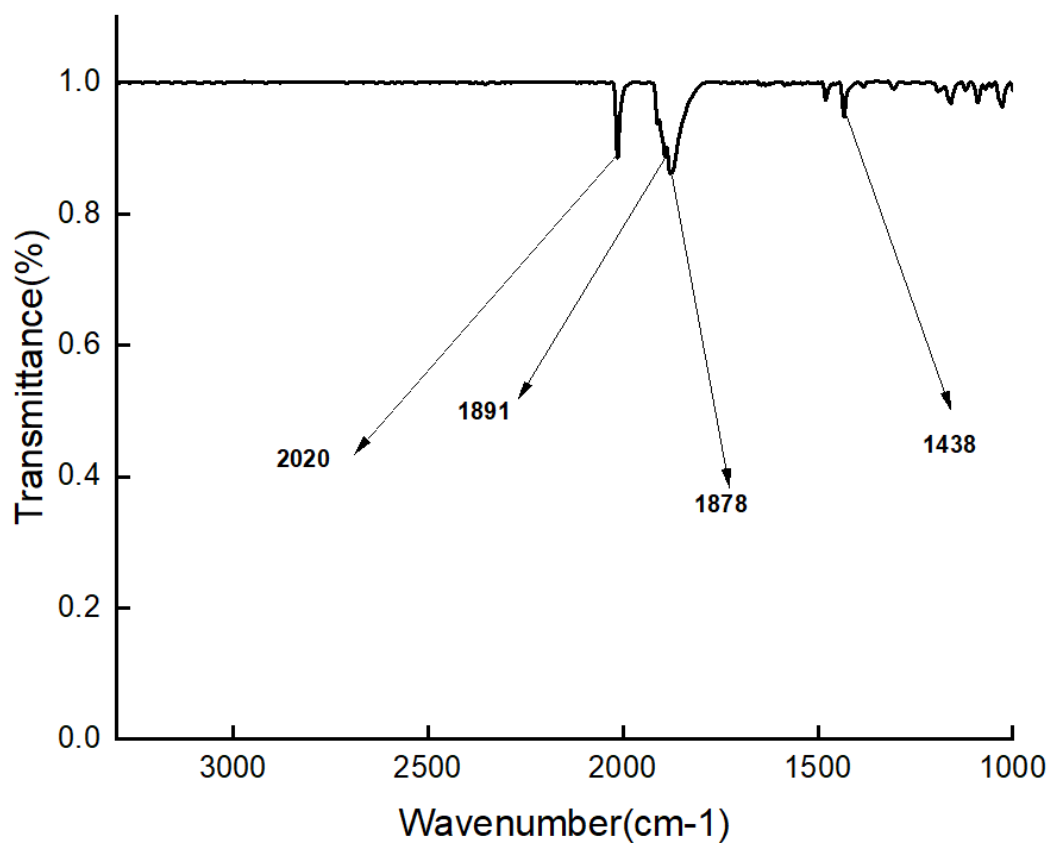

**Figure S61.** HRMS data for **C-4** (Exact mass = 794.0330).

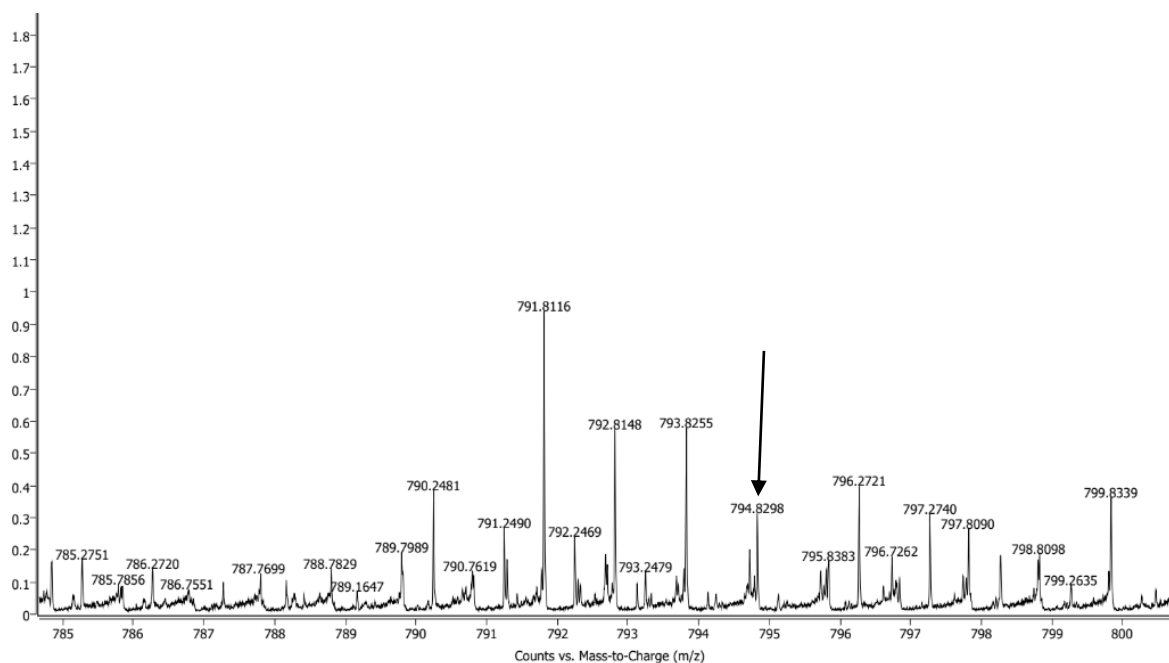

### 6 (e) Characterization data of C-5.

Mo(DpePhos)(CO)<sub>4</sub> (C-5)

<sup>1</sup>H NMR (500 MHz, CDCl<sub>3</sub>) δ 7.40-6.87 m (22H), 6.50 t(2H).

<sup>31</sup>P{<sup>1</sup>H}-NMR (203.0 MHz, CDCl<sub>3</sub>) δ 26.97 (2P).

FT-IR cm<sup>-1</sup> ν(CO) 2024, 1922, 1867.

HRMS C<sub>40</sub>H<sub>28</sub>MoO<sub>5</sub>P<sub>2</sub> Calculated 748.0466. Found 748.5423.

Figure S62. <sup>1</sup>H NMR for C-5.

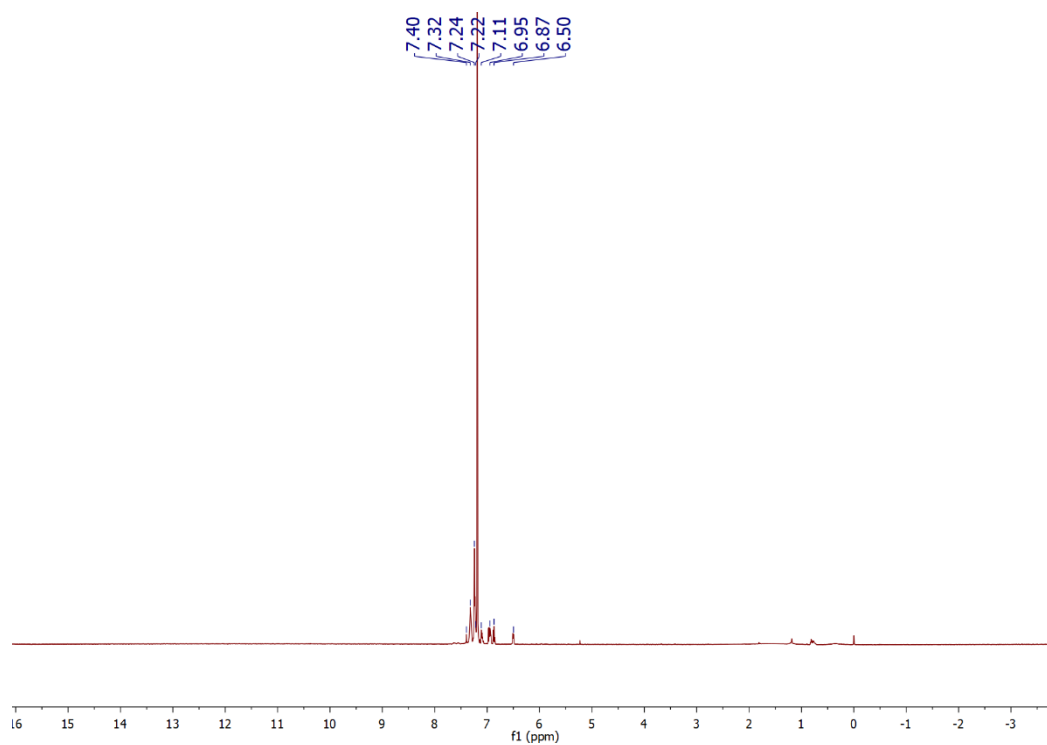

Figure S63. <sup>31</sup>P{<sup>1</sup>H} NMR for C-5.

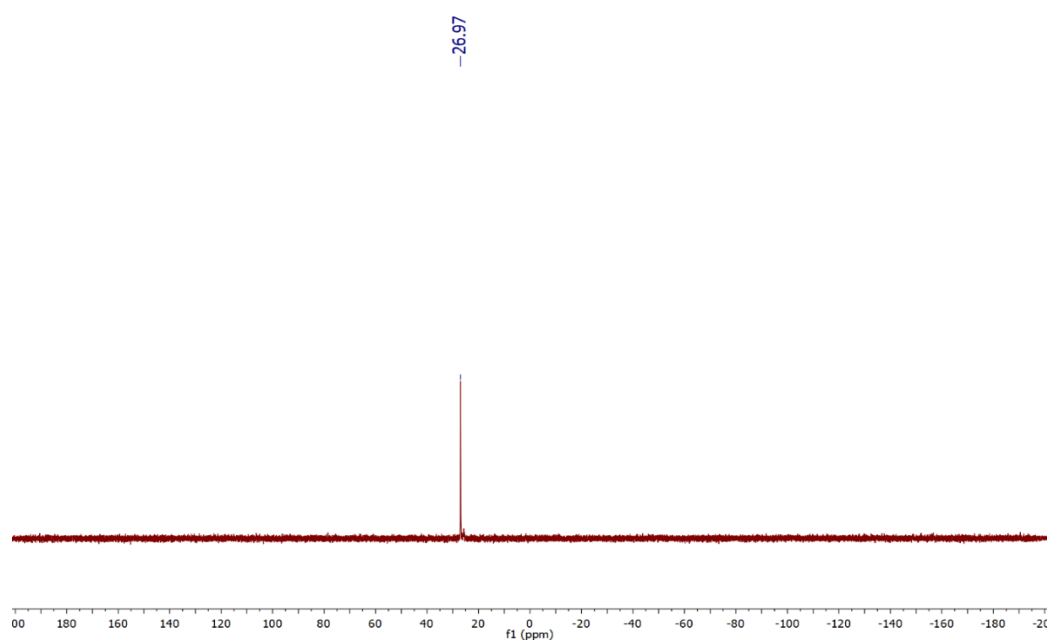



**Figure S64.** IR data for **C-5**.

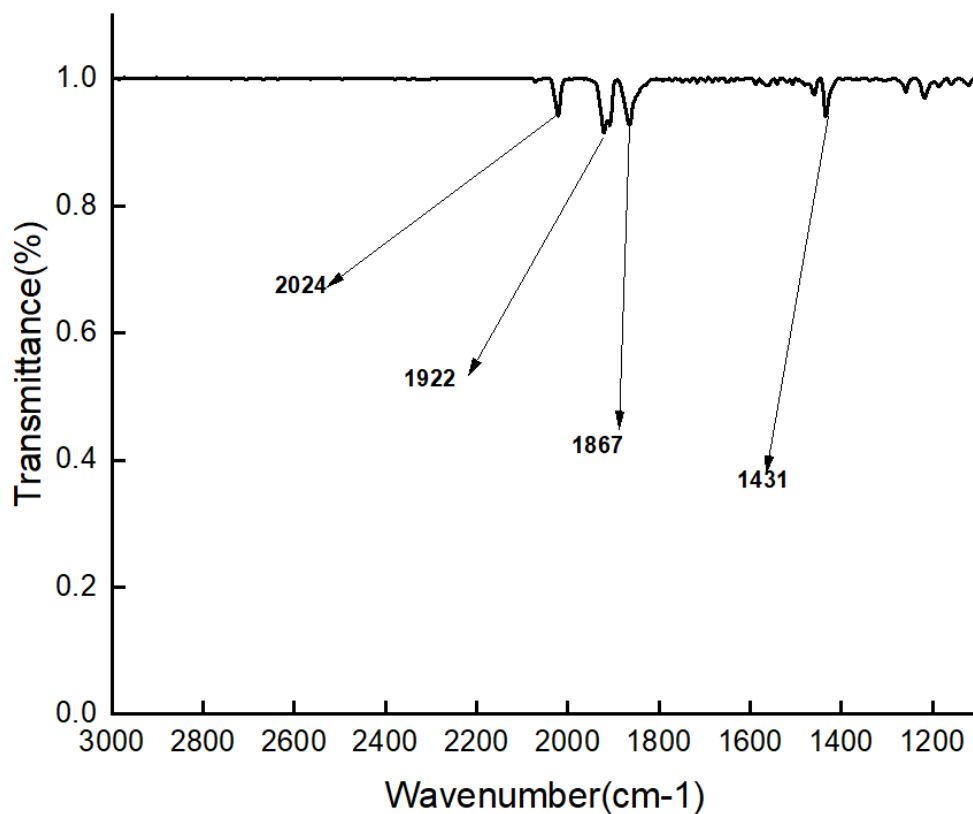

**Figure S65.** HRMS data for **C-5** (Exact mass = 748.0466).

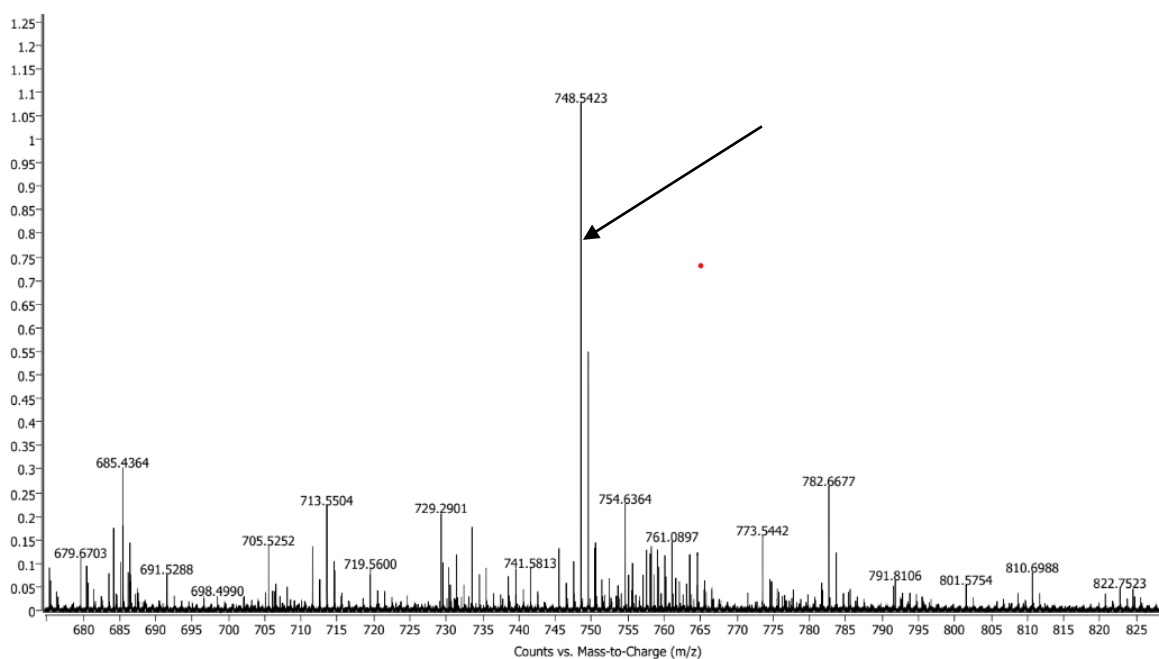

### 6(f) Characterization data of **C-6**.

**Mo(Xanthphos)(CO)<sub>4</sub> (C-6)**

<sup>1</sup>H NMR (500 MHz, CDCl<sub>3</sub>) δ 7.47-6.97 (m, 22H), 6.54 (t, 2H), 1.56 (t, 6H).

<sup>31</sup>P{<sup>1</sup>H}-NMR (203.0 MHz, CDCl<sub>3</sub>) δ 20.71 (2P).

FT-IR ( $\text{cm}^{-1}$ )  $\nu(\text{CO}) = 2013, 1913, 1862$ .

HRMS data of  $\text{C}_{43}\text{H}_{32}\text{MoO}_5\text{P}_2$ : Calculated 788.0779. Found 788.0768.

**Figure S66.**  $^1\text{H}$  NMR for **C-6**.

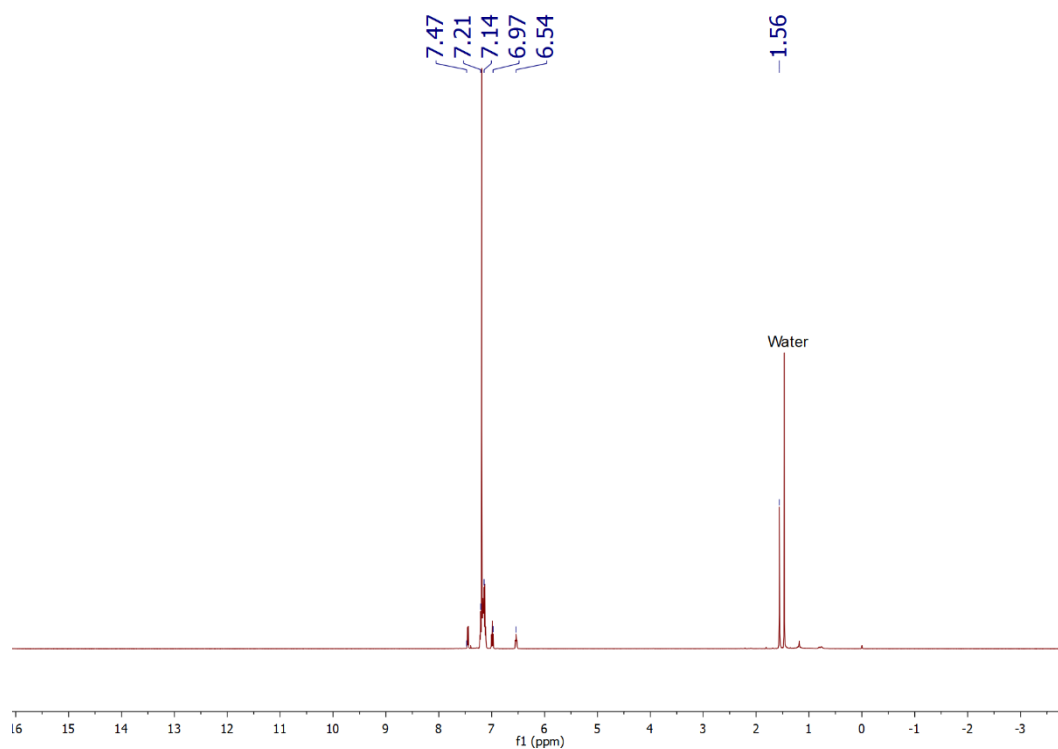

**Figure S67.**  $^{31}\text{P}\{^1\text{H}\}$  NMR for **C-6**.

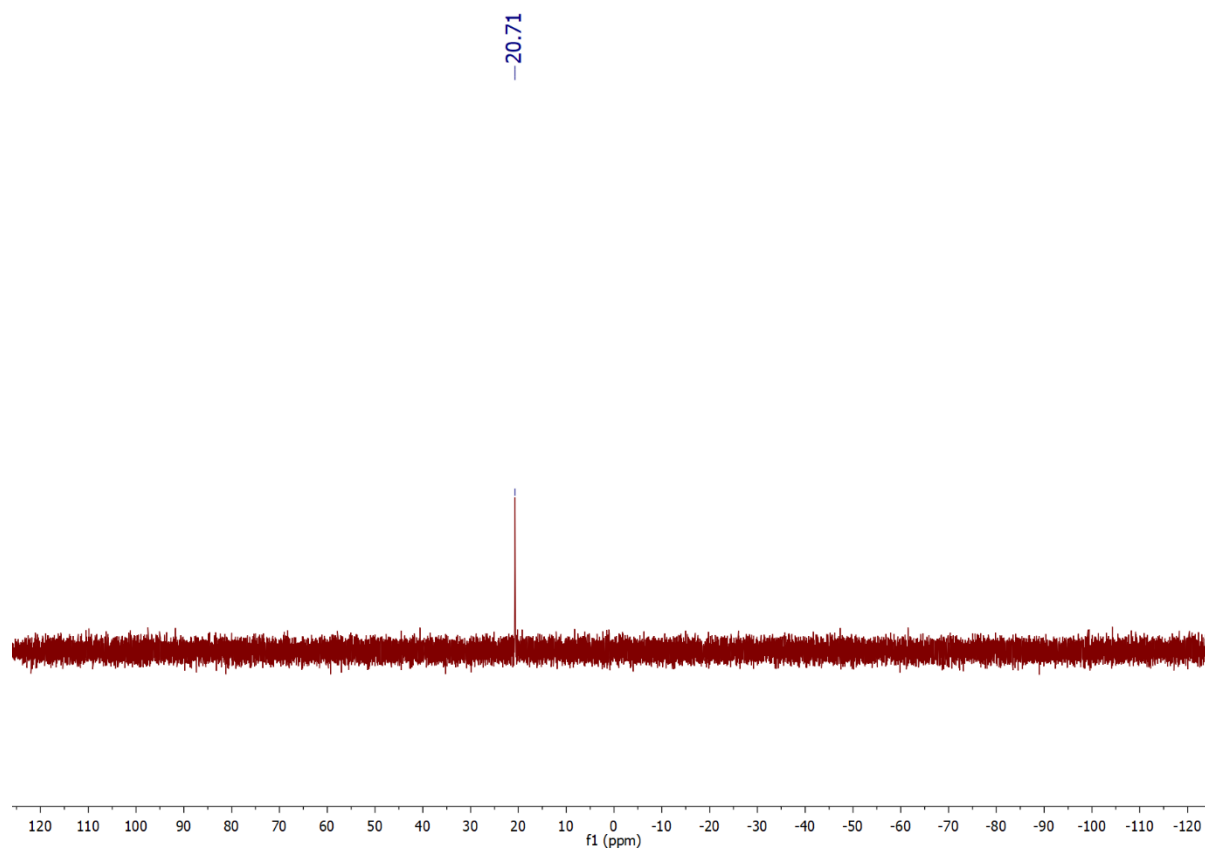

**Figure S68.** IR data for **C-6**.

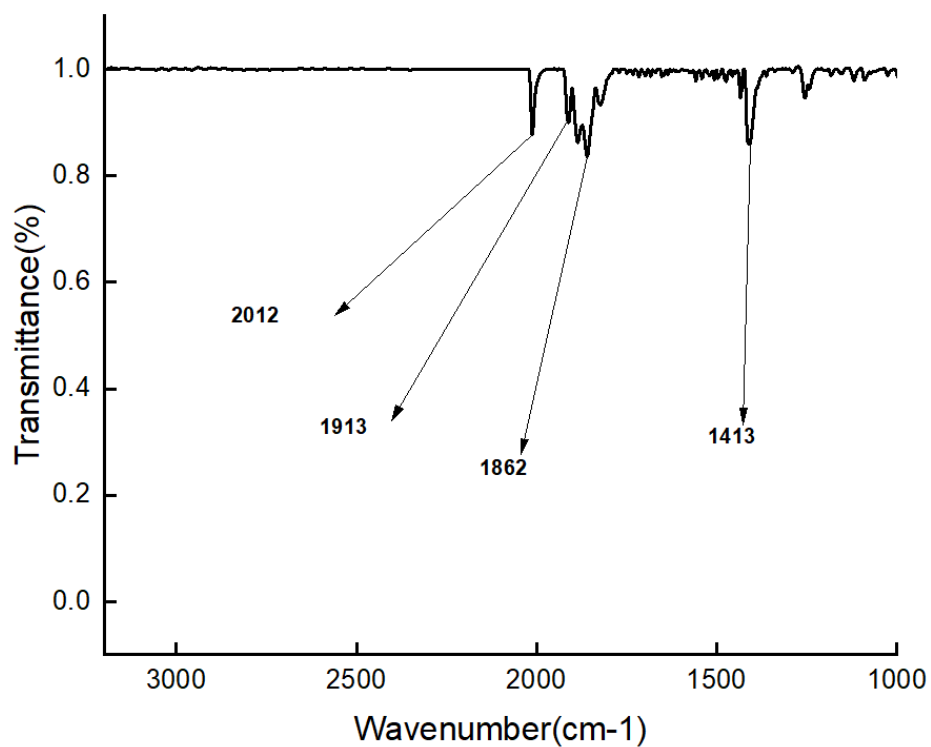

**Figure S69.** HRMS data for **C-6** (Exact mass = 788.0779).

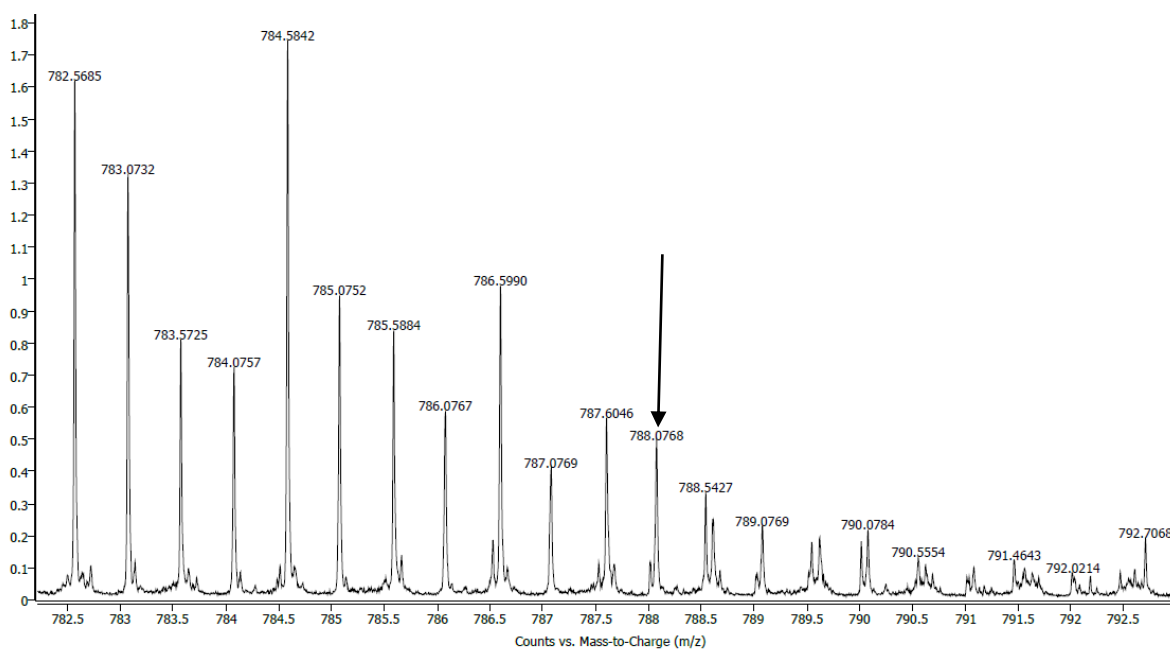

**6(g) Characterization data of C-7.**

Mo(DiPPF)(CO)<sub>4</sub> (**C-7**)

<sup>1</sup>H NMR (500 MHz, CDCl<sub>3</sub>) δ 4.31 (4H), 4.16 (4H), 2.24 (m, 4H), 1.93-1.24 (m, 24H).

<sup>31</sup>P{<sup>1</sup>H}-NMR (203.0 MHz, CDCl<sub>3</sub>) δ 41.25 (2P).

FT-IR ( $\text{cm}^{-1}$ )  $\nu(\text{CO}) = 2010, 1885, 1845$ .

HRMS of  $\text{C}_{26}\text{H}_{36}\text{FeMoO}_4\text{P}_2$ : Calculated 628.0480. Found 628.0483.

**Figure S70.**  $^1\text{H}$  NMR for **C-7**.

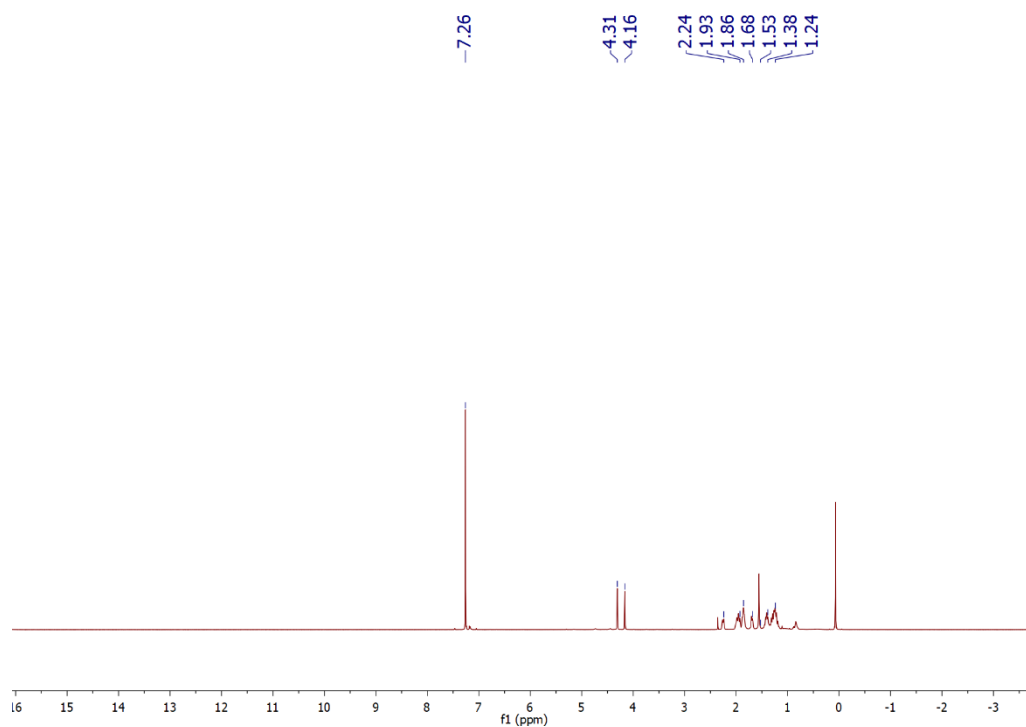

**Figure S71.**  $^{31}\text{P}\{^1\text{H}\}$  NMR for **C-7**.

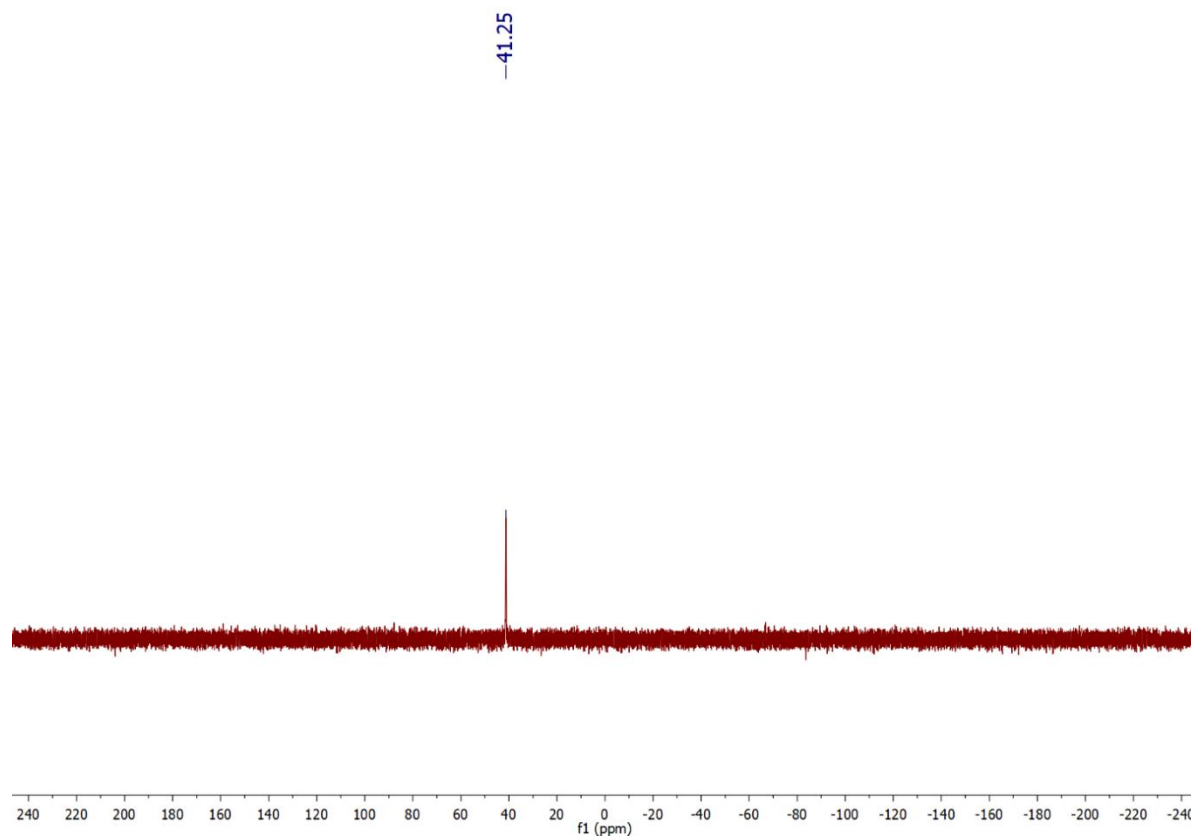

**Figure S72.** IR data for **C-7**.

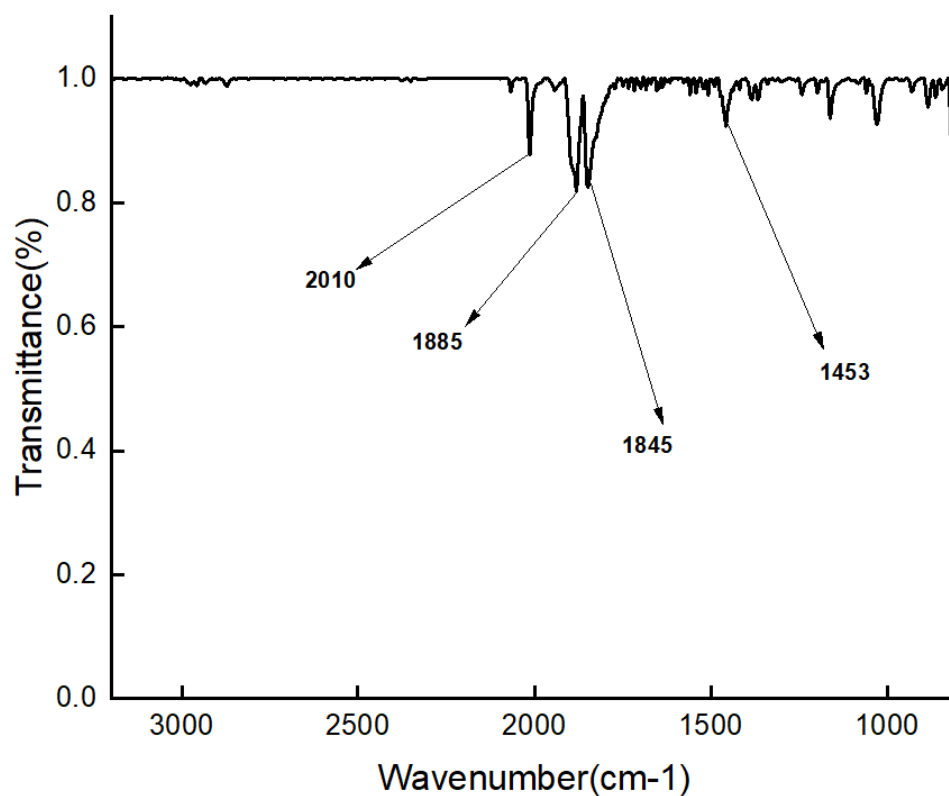

**Figure S73.** HRMS data for **C-7** (Exact mass = 628.0480).

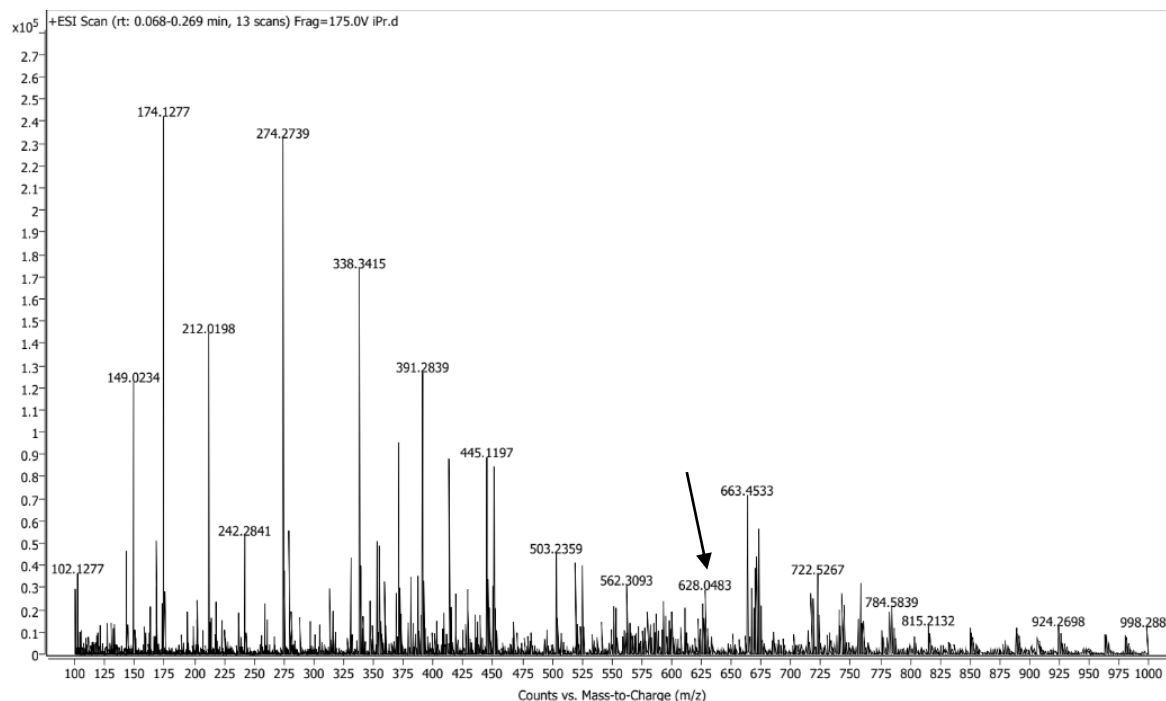

**6(h) Characterization data of C-8. Mo(DCPF)(CO)<sub>4</sub> (C-8)**

<sup>1</sup>H NMR (500 MHz, CDCl<sub>3</sub>) δ 4.34 (4H), 4.24 (4H), 2.31 (4H), 1.55 (4H), 1.30 (m, 20H), 1.20 (m, 16H).

$^{31}\text{P}\{^1\text{H}\}$ -NMR (203.0 MHz,  $\text{CDCl}_3$ )  $\delta$  33.61 (2P).

FT-IR ( $\text{cm}^{-1}$ )  $\nu(\text{CO}) = 2012, 1857$ .

HRMS:  $\text{C}_{38}\text{H}_{52}\text{FeMoO}_4\text{P}_2$  Calculated 788.1738. Found 788.1741.

**Figure S74.**  $^1\text{H}$  NMR for C-8.

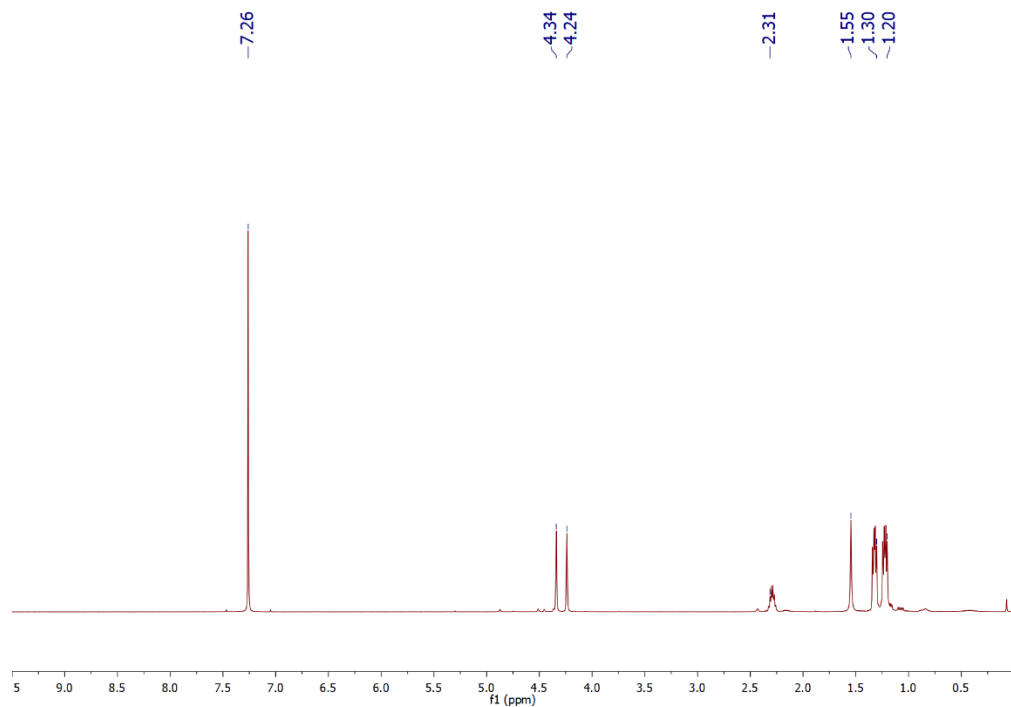

**Figure S75.**  $^{31}\text{P}\{^1\text{H}\}$  NMR for C-8.

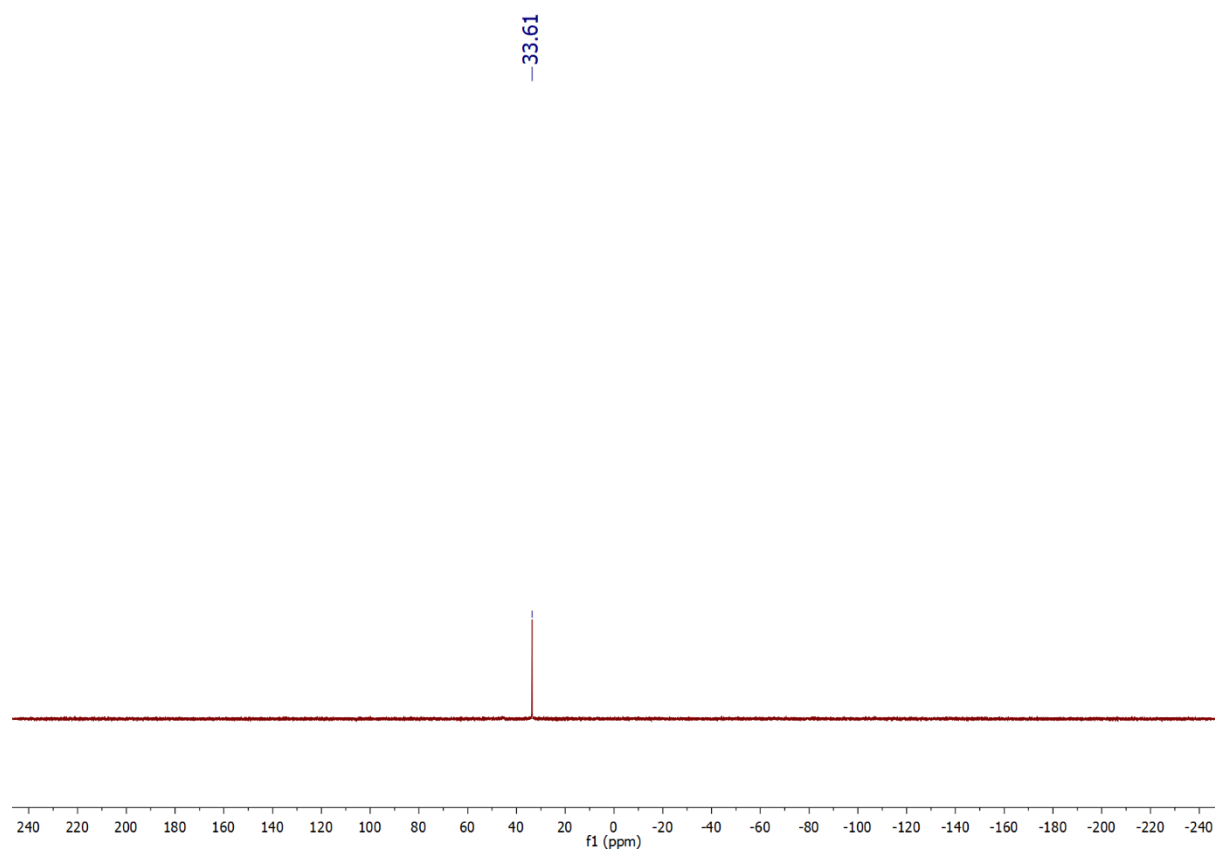

**Figure S76.** IR data for **C-8**.

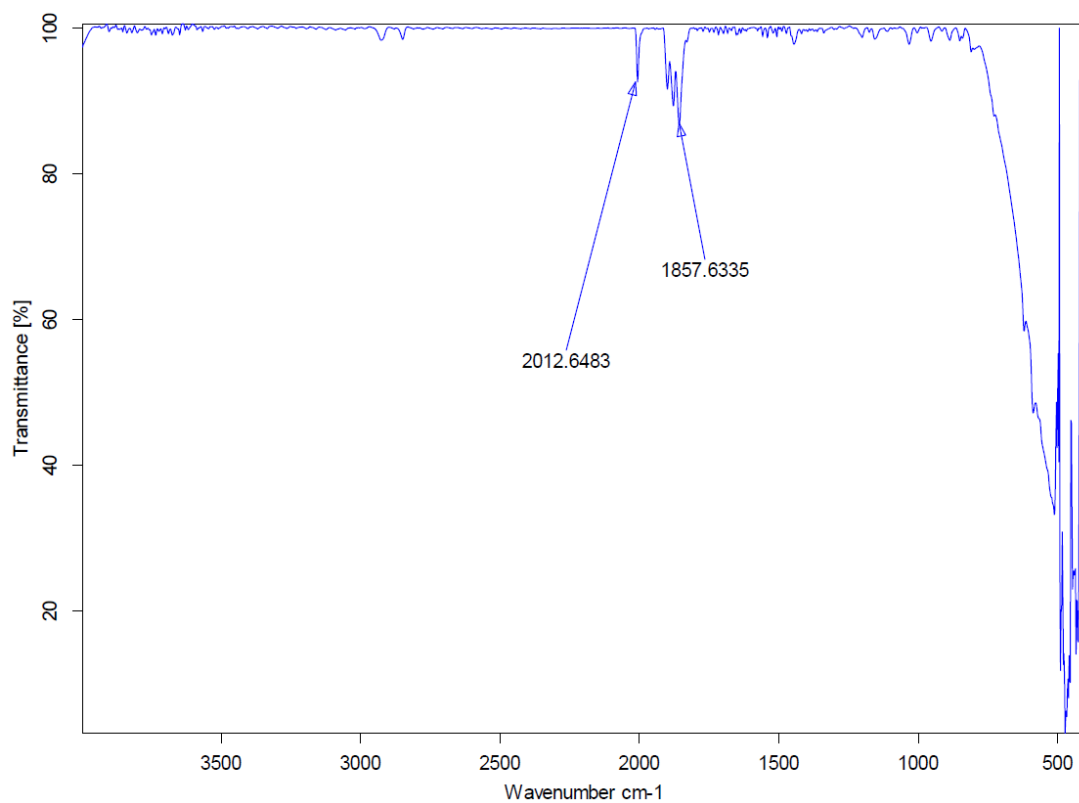

**Figure S77.** HRMS data for **C-8** (Exact mass = 788.1738)

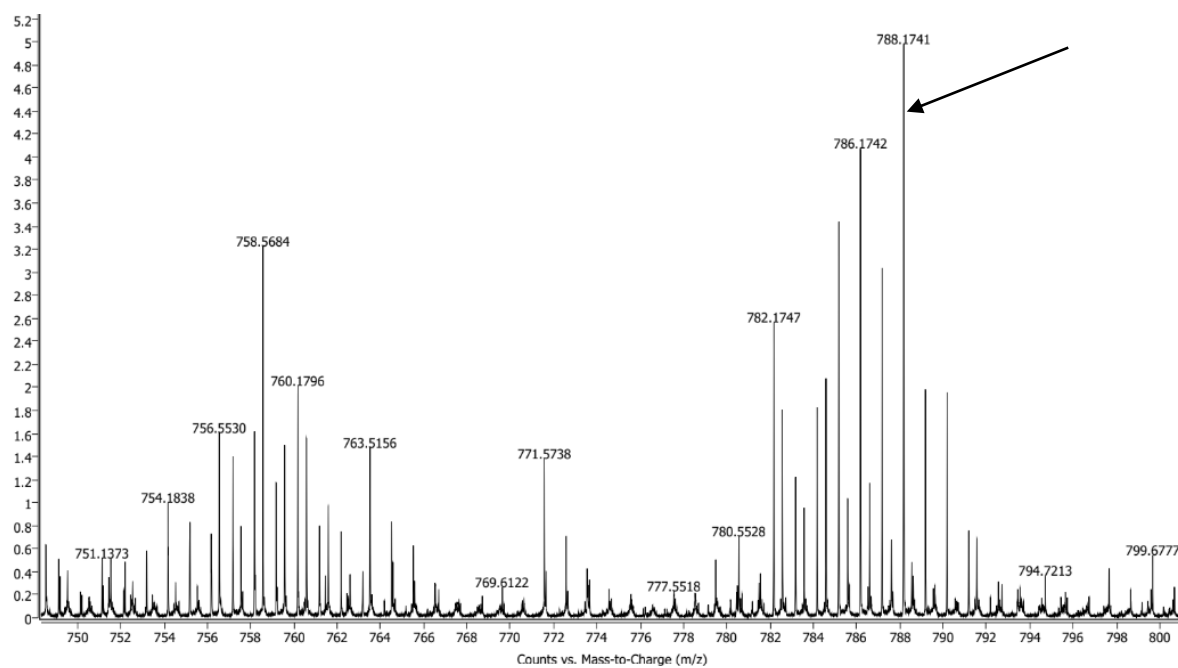

## 7. Crystal Data

**Mo(DPPM)(CO)<sub>4</sub>**

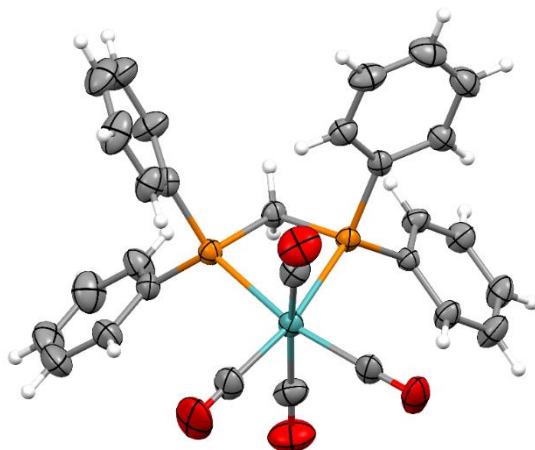

**Figure S78.** ORTEP drawing of C-1.

| <b>Table S1: Crystal data and structure refinement for C-1.</b> |                                                                 |
|-----------------------------------------------------------------|-----------------------------------------------------------------|
| Ccdc no.                                                        | 2241306                                                         |
| Empirical formula                                               | C <sub>29</sub> H <sub>22</sub> MoO <sub>4</sub> P <sub>2</sub> |
| Formula weight                                                  | 592.34                                                          |
| Temperature/K                                                   | 298                                                             |
| Crystal system                                                  | monoclinic                                                      |
| Space group                                                     | P2 <sub>1</sub> /c                                              |
| a/Å                                                             | 16.405(3)                                                       |
| b/Å                                                             | 9.5092(14)                                                      |
| c/Å                                                             | 18.135(3)                                                       |
| α/°                                                             | 90                                                              |
| β/°                                                             | 103.336(6)                                                      |
| γ/°                                                             | 90                                                              |
| Volume/Å <sup>3</sup>                                           | 2752.8(8)                                                       |
| Z                                                               | 4                                                               |
| ρ <sub>calc</sub> /g/cm <sup>3</sup>                            | 1.429                                                           |
| μ/mm <sup>-1</sup>                                              | 0.624                                                           |
| F(000)                                                          | 1200.0                                                          |
| Crystal size/mm <sup>3</sup>                                    | 0.231 × 0.098 × 0.078                                           |
| Radiation                                                       | MoKα (λ = 0.71073)                                              |
| 2θ range for data collection/°                                  | 4.616 to 49.996                                                 |
| Index ranges                                                    | -19 ≤ h ≤ 19, -11 ≤ k ≤ 11, -21 ≤ l ≤ 21                        |
| Reflections collected                                           | 50748                                                           |



|                                                |                                                                  |
|------------------------------------------------|------------------------------------------------------------------|
| Independent reflections                        | 4836 [ $R_{\text{int}} = 0.1448$ , $R_{\text{sigma}} = 0.0658$ ] |
| Data/restraints/parameters                     | 4836/0/325                                                       |
| Goodness-of-fit on $F^2$                       | 1.028                                                            |
| Final R indexes [ $I > 2\sigma(I)$ ]           | $R_1 = 0.0397$ , $wR_2 = 0.0714$                                 |
| Final R indexes [all data]                     | $R_1 = 0.0932$ , $wR_2 = 0.0923$                                 |
| Largest diff. peak/hole / $e \text{ \AA}^{-3}$ | 0.51/-0.58                                                       |

**Mo(DPPE)(CO)<sub>4</sub>**

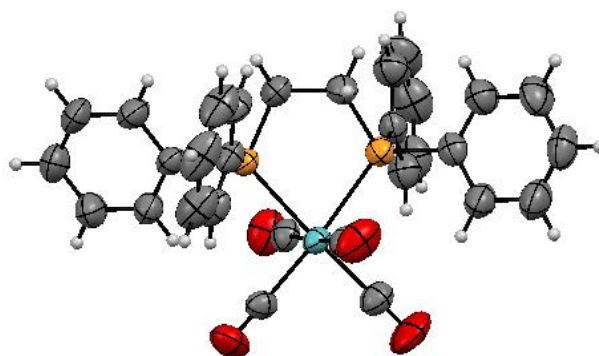

**Figure S79.** ORTEP drawing of **C-2**.

| <b>Table S2: Crystal data and structure refinement for C-2</b> |                        |
|----------------------------------------------------------------|------------------------|
| Ccdc no.                                                       | 2241303                |
| Empirical formula                                              | $C_{30}H_{24}MoO_4P_2$ |
| Formula weight                                                 | 606.37                 |
| Temperature/K                                                  | 298                    |
| Crystal system                                                 | orthorhombic           |
| Space group                                                    | Pbca                   |
| $a/\text{\AA}$                                                 | 16.8125(14)            |
| $b/\text{\AA}$                                                 | 14.6185(12)            |
| $c/\text{\AA}$                                                 | 22.679(2)              |
| $\alpha/^\circ$                                                | 90                     |
| $\beta/^\circ$                                                 | 90                     |
| $\gamma/^\circ$                                                | 90                     |
| Volume/ $\text{\AA}^3$                                         | 5573.9(8)              |
| Z                                                              | 8                      |
| $\rho_{\text{calc}}/\text{g/cm}^3$                             | 1.445                  |

|                                                |                                                               |
|------------------------------------------------|---------------------------------------------------------------|
| $\mu/\text{mm}^{-1}$                           | 0.619                                                         |
| F(000)                                         | 2464.0                                                        |
| Crystal size/ $\text{mm}^3$                    | $0.145 \times 0.125 \times 0.086$                             |
| Radiation                                      | MoK $\alpha$ ( $\lambda = 0.71073$ )                          |
| 2 $\Theta$ range for data collection/ $^\circ$ | 5.152 to 52.824                                               |
| Index ranges                                   | $-21 \leq h \leq 21, -17 \leq k \leq 18, -28 \leq l \leq 28$  |
| Reflections collected                          | 96953                                                         |
| Independent reflections                        | 5714 [ $R_{\text{int}} = 0.1140, R_{\text{sigma}} = 0.0401$ ] |
| Data/restraints/parameters                     | 5714/0/335                                                    |
| Goodness-of-fit on $F^2$                       | 1.066                                                         |
| Final R indexes [ $I \geq 2\sigma(I)$ ]        | $R_1 = 0.0366, wR_2 = 0.0835$                                 |
| Final R indexes [all data]                     | $R_1 = 0.0698, wR_2 = 0.1042$                                 |
| Largest diff. peak/hole / $e \text{ \AA}^{-3}$ | 0.53/-0.56                                                    |

### Mo(DPPF)(CO)<sub>4</sub>

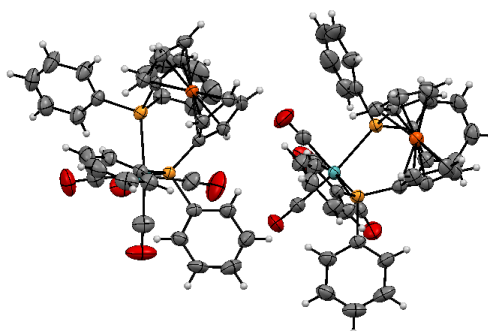

**Figure S80.** ORTEP drawing of C-4.

| <b>Table S3: Crystal data and structure refinement for C-4</b> |                                                                   |
|----------------------------------------------------------------|-------------------------------------------------------------------|
| Ccdc no.                                                       | 2241308                                                           |
| Empirical formula                                              | C <sub>38</sub> H <sub>28</sub> FeMoO <sub>4</sub> P <sub>2</sub> |
| Formula weight                                                 | 762.33                                                            |
| Temperature/K                                                  | 298.0                                                             |
| Crystal system                                                 | monoclinic                                                        |
| Space group                                                    | P2 <sub>1</sub> /n                                                |
| a/ $\text{\AA}$                                                | 9.3770(7)                                                         |
| b/ $\text{\AA}$                                                | 34.898(3)                                                         |
| c/ $\text{\AA}$                                                | 20.4468(16)                                                       |
| $\alpha/^\circ$                                                | 90                                                                |
| $\beta/^\circ$                                                 | 92.627(3)                                                         |
| $\gamma/^\circ$                                                | 90                                                                |
| Volume/ $\text{\AA}^3$                                         | 6684.0(9)                                                         |
| Z                                                              | 8                                                                 |
| $\rho_{\text{calc}}/\text{cm}^3$                               | 1.515                                                             |

|                                                |                                                                |
|------------------------------------------------|----------------------------------------------------------------|
| $\mu/\text{mm}^{-1}$                           | 0.945                                                          |
| F(000)                                         | 3088.0                                                         |
| Crystal size/ $\text{mm}^3$                    | $0.236 \times 0.156 \times 0.123$                              |
| Radiation                                      | MoK $\alpha$ ( $\lambda = 0.71073$ )                           |
| 2 $\Theta$ range for data collection/ $^\circ$ | 4.502 to 50.892                                                |
| Index ranges                                   | $-11 \leq h \leq 11, -42 \leq k \leq 42, -24 \leq l \leq 24$   |
| Reflections collected                          | 87639                                                          |
| Independent reflections                        | 12259 [ $R_{\text{int}} = 0.0926, R_{\text{sigma}} = 0.0515$ ] |
| Data/restraints/parameters                     | 12259/0/829                                                    |
| Goodness-of-fit on $F^2$                       | 1.035                                                          |
| Final R indexes [ $I \geq 2\sigma(I)$ ]        | $R_1 = 0.0338, wR_2 = 0.0689$                                  |
| Final R indexes [all data]                     | $R_1 = 0.0543, wR_2 = 0.0776$                                  |
| Largest diff. peak/hole / $e \text{ \AA}^{-3}$ | 0.34/-0.35                                                     |

### References:

1. J. Becica, O. D. Glaze, D. I. Wozniak and G. E. Dobereiner, *Organometallics*, 2018, **37**, 482–490.
2. J. Berstler, A. Lopez, D. Ménard, W. G. Dougherty, W. S. Kassel, A. Hansen, A. Daryaei, P. Ashitey, M. J. Shaw, N. Fey and C. Nataro, *J. of Organomet Chem.*, 2012, **712**, 37–45.
3. K. R. Birdwhistell, B. E. Schulz and P. M. Dizon, *Inorg. Chem. Commun*, 2012, **26**, 69–71.
